# Supplementary material for: Association of the neutrophil to lymphocyte ratio and clinical outcomes in patients with lung cancer receiving immunotherapy: a meta-analysis
Source: PubMed Central journal article supplement — BMJ Open. 2020 Jun 3;10(6):e035031. doi: 10.1136/bmjopen-2019-035031 (PMC7282333; doi:10.1136/bmjopen-2019-035031), 2020-06-03
Supplement: bmjopen-2019-035031.draft_revisions.pdf [file bmjopen-2019-035031.draft_revisions.pdf]

# BMJ Open

BMJ Open is committed to open peer review. As part of this commitment we make the peer review history of every article we publish publicly available.

When an article is published we post the peer reviewers' comments and the authors' responses online. We also post the versions of the paper that were used during peer review. These are the versions that the peer review comments apply to.

The versions of the paper that follow are the versions that were submitted during the peer review process. They are not the versions of record or the final published versions. They should not be cited or distributed as the published version of this manuscript.

BMJ Open is an open access journal and the full, final, typeset and author-corrected version of record of the manuscript is available on our site with no access controls, subscription charges or pay-per-view fees (<http://bmjopen.bmj.com>).

If you have any questions on BMJ Open's open peer review process please email [info.bmjopen@bmj.com](mailto:info.bmjopen@bmj.com)

# BMJ Open

## Correlation of the neutrophil to lymphocyte ratio and clinical outcomes in lung cancer patients receiving immunotherapy: a meta-analysis

|                               |                                                                                                                                                                                                                   |
|-------------------------------|-------------------------------------------------------------------------------------------------------------------------------------------------------------------------------------------------------------------|
| Journal:                      | <i>BMJ Open</i>                                                                                                                                                                                                   |
| Manuscript ID                 | bmjopen-2019-035031                                                                                                                                                                                               |
| Article Type:                 | Original research                                                                                                                                                                                                 |
| Date Submitted by the Author: | 17-Oct-2019                                                                                                                                                                                                       |
| Complete List of Authors:     | Jin, Jing; Sichuan University West China Hospital<br>Yang, Lan; Sichuan University West China Hospital<br>Liu, Dan; Sichuan University West China Hospital<br>Li, Weimin; Sichuan University West China Hospital, |
| Keywords:                     | Immunology < BASIC SCIENCES, Epidemiology < ONCOLOGY,<br>Respiratory tract tumours < ONCOLOGY                                                                                                                     |
|                               |                                                                                                                                                                                                                   |

SCHOLARONE™  
Manuscripts

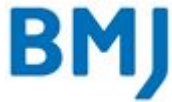

I, the Submitting Author has the right to grant and does grant on behalf of all authors of the Work (as defined in the below author licence), an exclusive licence and/or a non-exclusive licence for contributions from authors who are: i) UK Crown employees; ii) where BMJ has agreed a CC-BY licence shall apply, and/or iii) in accordance with the terms applicable for US Federal Government officers or employees acting as part of their official duties; on a worldwide, perpetual, irrevocable, royalty-free basis to BMJ Publishing Group Ltd ("BMJ") its licensees and where the relevant Journal is co-owned by BMJ to the co-owners of the Journal, to publish the Work in this journal and any other BMJ products and to exploit all rights, as set out in our [licence](#).

The Submitting Author accepts and understands that any supply made under these terms is made by BMJ to the Submitting Author unless you are acting as an employee on behalf of your employer or a postgraduate student of an affiliated institution which is paying any applicable article publishing charge ("APC") for Open Access articles. Where the Submitting Author wishes to make the Work available on an Open Access basis (and intends to pay the relevant APC), the terms of reuse of such Open Access shall be governed by a Creative Commons licence – details of these licences and which [Creative Commons](#) licence will apply to this Work are set out in our licence referred to above.

Other than as permitted in any relevant BMJ Author's Self Archiving Policies, I confirm this Work has not been accepted for publication elsewhere, is not being considered for publication elsewhere and does not duplicate material already published. I confirm all authors consent to publication of this Work and authorise the granting of this licence.

1  
2  
3  
4 **Correlation of the neutrophil to lymphocyte ratio and clinical**  
5  
6 **outcomes in lung cancer patients receiving immunotherapy: a**  
7  
8 **meta-analysis**  
9  
10

11  
12  
13  
14 **Jing Jin<sup>1</sup>, Lan Yang<sup>1</sup>, Dan Liu<sup>1</sup>, Wei-Min Li<sup>1\*</sup>**  
15

16  
17 1. Department of Pulmonary & Critical Care, West China Hospital, Sichuan  
18  
19 University, Chengdu 610041, China.  
20

21  
22 **Running title:** Neutrophil to lymphocyte ratio and lung cancer  
23

24  
25 **Address correspondence to:** Dr. Wei-Min Li, Department of Pulmonary & Critical  
26  
27 Care, West China Hospital, Sichuan University, Chengdu 610041, China. Tel: +86 (028)  
28  
29 85423998; E-mail: [weimin003@yahoo.com](mailto:weimin003@yahoo.com)  
30  
31

32  
33 **Article summary**  
34

35  
36 **Strengths and limitations of this study**  
37

38 **1. Verifying the prognostic value of NLR in a large of lung cancer patients with**  
39  
40 **immunotherapy**  
41

42  
43 **2. Different clinical characteristics could affect the prognostic value**  
44

45  
46 **3. High heterogeneity was present in this analysis**  
47

48 **Patient and Public Involvement: No patient involved**  
49  
50  
51  
52  
53  
54  
55  
56  
57  
58  
59  
60

1  
2  
3  
4 **Abstract:**

5  
6 **Objectives:** We conducted a meta-analysis to explore the relationship between  
7 pretreatment or posttreatment neutrophil to lymphocyte ratio (NLR) and overall  
8 survival (OS)/progress free survival (PFS) in lung cancer patients receiving  
9 immunotherapy.  
10  
11  
12  
13  
14  
15

16  
17 **Setting:** Medical Center in Southwestern of China  
18

19  
20 **Participants:** Studies reporting the prognostic value of NLR in lung cancer patients  
21 receiving immunotherapy were enrolled.  
22  
23

24  
25 **Primary and secondary outcome measures:** We searched PubMed, Cochrane  
26 Library, Embase and Web of Science to collect relevant studies conducted until July  
27 2019. We carefully reviewed the full text of included publications and combined the  
28 hazard ratios (HRs) and 95% confidence intervals (CIs) to assess the correlation  
29 between the NLR and survival time in lung cancer patients receiving immunotherapy.  
30  
31  
32  
33  
34  
35  
36  
37

38 **Results:** Twenty-three studies with 2068 patients were enrolled. Among all patients,  
39 1305 (64.0%) were males, and 643 (31.38%) were diagnosed with squamous  
40 carcinoma. In a pooled analysis of OS and PFS from all studies, an elevated NLR  
41 predicted poorer OS ((HR=1.62; 95% CI: 1.41-1.87; P< 0.001) and PFS (HR=1.47;  
42 95% CI: 1.25-1.72; P< 0.0001). Subgroup analyses stratified showed that the  
43  
44  
45  
46  
47  
48  
49  
50  
51  
52  
53  
54  
55  
56  
57  
58  
59  
60

1  
2  
3  
4 posttreatment NLR was not significantly related to OS and that patients in Asia were  
5  
6 significantly associated with higher HRs than those in Europe and America.  
7  
8

9 Furthermore, the proportion of squamous cell carcinoma and baseline level of NLR  
10  
11 affect the prognosis value of NLR.  
12  
13

14 **Conclusions:** Our study found that an elevated NLR was associated with poorer OS  
15  
16 and PFS in lung cancer patients receiving immunotherapy and that several clinical  
17  
18 factors might have an impact on the predictive value of NLR in the survival of lung  
19  
20 cancer patients. However, further studies are warranted to draw firm conclusions.  
21  
22  
23

24 **Trial registration:** The registration number of PROSPERO: CRD42018104856.  
25  
26  
27

28  
29  
30 **Keywords:** NLR; systemic inflammation; prognostic markers; lung cancer  
31  
32  
33  
34  
35  
36  
37  
38  
39  
40  
41  
42  
43  
44  
45  
46  
47  
48  
49  
50  
51  
52  
53  
54  
55  
56  
57  
58  
59  
60

**Introduction:**

Lung cancer is the most prevalent cancer and life-threatening malignancy worldwide.(1) The pathogenesis of lung cancer is complicated, and the primary treatments for lung cancer patients are surgery and chemotherapy. Unfortunately, most patients with lung cancer are diagnosed at advanced stages, and the benefits achieved from chemotherapy in advanced lung cancer patients are relatively small. Recently, many studies have revealed that tumor cells can evade the antitumor responses of T-cells by controlling the combined responses of programmed cell death protein 1 (PD-1) and programmed cell death ligand-1 (PD-L1).(2) Nivolumab, pembrolizumab, atezolizumab, durvalumab, ipilimumab and tremelimumab have successfully changed clinical experiences in lung cancer treatment.(3) Tumor mutational burden,(4) neoantigens(5) and classical monocytes in the peripheral blood(6) are effective predictive biomarkers for immune checkpoint therapy in lung cancer, especially PD-L1 expression on tumor cells.(7) Systemic inflammation in patients with cancer is considered to influence the growth and migration of tumors by some inflammatory factors.(8) Elevated levels of systemic inflammation, including Glasgow prognostic score (GPS), neutrophil to lymphocyte ratio (NLR), platelet to lymphocyte ratio (PLR), C-reactive protein to albumin ratio (CAR), has been

1  
2  
3  
4 indicated to be associated with worse survival in solid tumors.(9-11) However, the  
5  
6 data of prognosis from pretreatment NLR in lung cancer patients receiving  
7  
8 immunotherapy trials are still scarce and inconsistent. Therefore, we collected the  
9  
10 available publications and conducted a meta-analysis to explore the prognostic value  
11  
12 of pretreatment NLR for OS and PFS in clinical trials of lung cancer patients  
13  
14 receiving immunotherapy.  
15  
16  
17  
18

## 19 **Materials and Methods**

### 20 **Search strategy**

21  
22 PRISMA guidelines for systematic review and meta-analysis were followed strictly in  
23  
24 this article. An online search was conducted to identify relevant publications in  
25  
26 PubMed, Cochrane Library, Web of Science and Embase databases. The following  
27  
28 words were used: “Pulmonary Neoplasms”, “neutrophil lymphocyte ratio”,  
29  
30 “immunotherapy”, “programmed death receptor-1”, and “immune checkpoint  
31  
32 inhibitor” for studies on the associations between pretreatment NLR and survival time  
33  
34 in patients with lung cancer published before July 2019. A full electronic search  
35  
36 strategy is provided in the supplement materials (Supplement Table 1). Additional  
37  
38 studies were selected for the full text to be reviewed by exploring the references cited  
39  
40 in the selected articles and relevant reviews. The articles were limited to the English  
41  
42  
43  
44  
45  
46  
47  
48  
49  
50  
51  
52  
53  
54  
55  
56  
57  
58  
59  
60



1  
2  
3  
4 language but no restrictions were used for the minimum number of patients. Two  
5  
6 authors (J Jin and L Yang) independently reviewed the titles and abstracts of the  
7  
8 retrieved articles to select the potentially relevant articles that to be more carefully  
9  
10 assessed.  
11  
12

### 13 14 **Eligibility criteria**

15  
16 The inclusion criteria were as follows: 1) retrospective or prospective studies  
17  
18 published before July 2019; 2) all patients enrolled in studies were diagnosed with  
19  
20 lung cancer by biopsy and received immunotherapy; 3) the value of NLR was  
21  
22 calculated based on the level of neutrophils and lymphocytes; and 4) HRs and 95%  
23  
24 CIs were provided and data necessary to calculate them were reported.  
25  
26  
27

28  
29 The exclusion criteria: 1) review, meeting abstract, letter, or full text unavailable in  
30  
31 English; 2) nonhuman studies; and 3) research did not present the value of the NLR.  
32  
33  
34

### 35 **Data extraction**

36  
37 From each study, the name of the study, first author, year of publication, study design,  
38  
39 number of patients, sex distribution, age, median follow-up time, histology, NLR  
40  
41 cutoff value, NLR at baseline, line of therapy, drugs and HRs with 95% CIs for  
42  
43 overall survival (OS) and progress free survival (PFS) were extracted by two authors  
44  
45 (D Liu and L Yang). If univariate and multivariate analysis results were  
46  
47  
48  
49  
50  
51  
52  
53  
54  
55  
56  
57  
58  
59  
60

1  
2  
3  
4 simultaneously reported, only multivariate analysis results were extracted. Any  
5  
6 disagreements between the authors were resolved by discussion and consensus. The  
7  
8 most recent study was chosen when duplicate studies occurred.  
9

### 10 11 **Quality assessment**

12  
13  
14 The primary studies were assessed by the NOS (Newcastle-Ottawa quality assessment  
15  
16 Scale). The quality assessment was conducted by two independent researchers (J Jin  
17  
18 and D Liu). The studies in which the mark was between 6 and 9 points were regarded  
19  
20 as high-quality studies.  
21  
22

23  
24  
25 ([http://www.ohri.ca/programs/clinical\\_epidemiology/oxford.asp](http://www.ohri.ca/programs/clinical_epidemiology/oxford.asp))  
26

### 27 **Statistical analysis**

28  
29  
30 The primary endpoints were OS and PFS of lung cancer patients receiving  
31  
32 immunotherapy. PFS was defined as the time from the initial date of immunotherapy  
33  
34 to the date of progression or death. OS was calculated from the date of inclusion to  
35  
36 the time of death from any cause. HRs with 95% CIs were directly obtained from the  
37  
38 articles or estimated from the Kaplan-Meier curves according to the methods reported  
39  
40 by Tierney et al.(12) We calculated the pooled HRs of OS and PFS using random  
41  
42 effects or fixed effects model. We performed the Q-test to assess between-study  
43  
44 heterogeneity and calculated the  $I^2$  statistic, which expresses the percentage of the  
45  
46  
47  
48  
49  
50  
51  
52  
53  
54  
55  
56  
57  
58  
59  
60

1  
2  
3  
4 total observed variability due to study heterogeneity. The heterogeneity between  
5  
6 studies was considered small if the  $I^2$  statistic was less than 50% and the P value for  
7  
8 Q-test was less than 0.05. We performed a subgroup analysis to detect the source of  
9  
10 heterogeneity. In addition, we only considered subgroups that included more than two  
11  
12 studies. Publication bias was assessed by Egger's and Begg's test, and a significant  
13  
14 publication bias was defined as a  $P < 0.10$ .(13) Trim and fill method was applied when  
15  
16 significant publication bias was found to confirm the pooled results. Sensitivity  
17  
18 analyses were carried out by excluding each study individually from the meta-  
19  
20 analysis.(14) All statistical analyses were performed with R (Version: 3.5.2).

## 27 **Result**

### 30 **The characteristics of the included studies**

31  
32 A total of 1102 studies were retrieved in this meta-analysis, and 26 of these studies  
33  
34 were selected for full-text review. In total, 23 studies with 2068 patients fulfilled the  
35  
36 inclusion criteria, with publication dates ranging from 2017 to 2018.(15-37) The flow  
37  
38 diagram of this study is shown in Fig 1. The sample size was between 19 and 201  
39  
40 patients. Of these studies, 9 were conducted in Europe, (16, 17, 21, 24, 27, 30, 35, 36)  
41  
42 5 were conducted in America, (22, 28, 31, 33, 37) and the remaining studies were  
43  
44 conducted in Asia. Among all patients included, 1305 (64.0%) were males, and 643  
45  
46  
47  
48  
49  
50  
51  
52  
53  
54  
55  
56  
57  
58  
59  
60

1  
2  
3  
4 (31.38%) were diagnosed with squamous carcinoma. Twenty studies explored the  
5  
6 association between NLR and OS; fifteen studies investigated the relationship  
7  
8 between PFS and NLR. Additionally, 7 of 23 studies provided data about  
9  
10 posttreatment NLR. (21, 23, 25, 28, 29, 32, 33) If the study provided data about  
11  
12 posttreatment NLR and OS, we treated it as an independent research in the subsequent  
13  
14 analysis. Six trials were performed as first-line therapy, (16, 19, 25, 28, 31, 36) and  
15  
16 the other studies were second or additional lines of therapy. Almost all patients  
17  
18 received nivolumab as an immunotherapy for PD-1 inhibitor. The cutoff value of  
19  
20 NLR was not the same in all studies; the value of 5 was mostly used among all  
21  
22 publications, and the median cutoff value for all enrolled publications was also 5. The  
23  
24 NOS scores of the enrolled studies ranged from 6-9. Detailed information about these  
25  
26 studies is presented in Table 1.  
27  
28  
29  
30  
31  
32  
33

### 34 35 **Relationship between NLR and OS in lung cancer patients receiving** 36 37 **immunotherapy** 38 39

40 A total of 1629 patients treated with immunotherapy from 20 studies provided the  
41  
42 NLR value or the data to calculate the NLR and OS values. Five of these studies  
43  
44 provided data about posttreatment NLR and OS. A total of 23 researches to combine  
45  
46 the HR and 95% CI. In the pooled analysis of NLR and OS, we found that a higher  
47  
48  
49  
50  
51  
52  
53  
54  
55  
56  
57  
58  
59  
60

1  
2  
3  
4 level of NLR was associated with a poorer OS with a high heterogeneity (HR=1.62;  
5  
6 95% CI: 1.41-1.87; P< 0.001) ( $I^2=81.7\%$ , P< 0.0001) (Fig 2). To detect the source of  
7  
8 heterogeneity, we conducted a subgroup analysis on some clinical factors that may  
9  
10 influence the final results, such as study design, the time of detecting NLR, ethnicity,  
11  
12 sex ratio, the proportion of squamous cell carcinoma (SCC%), the level of NLR at  
13  
14 baseline, the treatment line, median follow-up time, sample size and the drug for  
15  
16 immunotherapy (Fig 3). Interestingly, the association between the pretreatment NLR  
17  
18 and OS showed a similar trend to the pooled result (HR=1.87; 95% CI: 1.46-2.39; P<  
19  
20 0.0001). However, the posttreatment NLR seemed to not be significantly related to  
21  
22 the OS in lung cancer patients (HR=1.80; 95% CI: 0.81-4.00; P= 0.11). However,  
23  
24 these results were still highly heterogeneous (pretreatment:  $I^2=79.80\%$ , P< 0.0001;  
25  
26 posttreatment:  $I^2=83.5\%$ , P< 0.0001). Furthermore, the NLR was significantly  
27  
28 unrelated to the OS in the studies in which the proportion of patients with squamous  
29  
30 cell carcinoma or the proportion of patients whose NLR baseline levels exceeded the  
31  
32 cutoff value was greater than 50% (Fig 3). The subgroup analysis stratified by  
33  
34 ethnicity found that patients in Asia were significantly associated with a higher HR  
35  
36 (HR=2.76; 95% CI: 1.88- 4.06) and smaller heterogeneity ( $I^2=45.7\%$ , P=0.09) than  
37  
38 those in Europe and America ( $P_{\text{interaction}}=0.030$ ).  
39  
40  
41  
42  
43  
44  
45  
46  
47  
48  
49  
50  
51  
52  
53  
54  
55  
56  
57  
58  
59  
60

## **Relationship between NLR and PFS in lung cancer patients receiving immunotherapy**

The data for NLR and PFS of 1612 patients treated with immunotherapy in 15 studies (20 researches) were extracted to obtain a pooled HR and 95% CI. Four of these studies provided the posttreatment NLR and its relationship with PFS. The random effects model revealed a significant association between an elevated NLR and PFS in lung cancer patients receiving immunotherapy (HR=1.47; 95% CI: 1.25-1.72;  $P < 0.0001$ ) with high heterogeneity ( $I^2=72.5\%$ ,  $P < 0.0001$ ) (Fig 4). To detect the potential source of heterogeneity in studies reporting PFS data, subgroup analysis stratified by the factors that affect the HR were proposed, as previously mentioned (Fig 5). Similar to the relationship between the NLR and OS, the NLR was significantly unrelated to the PFS in studies in which the proportion of patients with squamous cell carcinoma was greater than 50% ( $P_{\text{interaction}}=0.005$ ). However, the pooled results for subgroups by other factors were not markedly changed with low-level heterogeneity.

### **Sensitivity analysis and Publication bias**

We found high heterogeneity among studies enrolled in the analysis of the relationship among pretreatment NLR, OS and PFS. Therefore, we performed a

1  
2  
3  
4 sensitivity analysis on all enrolled studies. The effect of each single study set on the  
5  
6 combined HRs was evaluated by excluding each study individually from the meta-  
7  
8 analysis. The results of the sensitivity analysis showed that the pooled HRs for OS  
9  
10 and PFS were robust in our meta-analysis (Fig 6A and 6B). We conducted a subgroup  
11  
12 analysis stratified by various factors to detect the source of heterogeneity. The Begg's  
13  
14 test presented no evidence of obvious publication bias in both studies reporting the  
15  
16 association between NLR and OS ( $P=0.673$ ) and those reporting the association  
17  
18 between NLR and PFS ( $P=0.074$ ), but the Egger's test showed significant publication  
19  
20 bias in both ( $P<0.001$  for both). Therefore, we performed a trim and fill analysis on  
21  
22 studies reporting the relationship between NLR and OS/PFS. However, the result was  
23  
24 unchanged after eliminating the influence of publication bias (OS: HR=1.40; 95%  
25  
26 CI:1.22-1.60;  $P<0.0001$ , PFS: HR=1.33; 95% CI:1.14-1.56;  $P=0.0004$ , supplement  
27  
28 fig 1).  
29  
30  
31  
32  
33  
34  
35  
36  
37

### 38 **Discussion:**

39  
40 The results of our meta-analysis revealed the prognostic effect of both pretreatment  
41  
42 and posttreatment NLR on OS and PFS in lung cancer patients receiving  
43  
44 immunotherapy. Twenty-three studies involving a total of 2049 lung cancer patients  
45  
46 showed that an increased NLR was significantly associated with a poorer OS  
47  
48  
49  
50  
51  
52  
53  
54  
55  
56  
57  
58  
59  
60

1  
2  
3  
4 (HR=1.62; 95% CI: 1.41-1.87; P< 0.001) and PFS (HR=1.47; 95% CI: 1.25-1.72; P<  
5  
6 0.0001). Interestingly, the posttreatment NLR did not seem to be significantly related  
7  
8 to OS, and patients in Asia were significantly associated with higher HRs than those  
9  
10 in Europe and America.  
11  
12

13  
14 The immune checkpoint is a kind of mechanism that plays a protective role in the  
15  
16 human immune system and acts like a brake to prevent inflammatory damage caused  
17  
18 by excessive activation of T cells.(38) Human anti-PD-1 IgG4 mAb is now widely  
19  
20 used and shows higher efficacy than standard therapies in lung cancer. (39) Despite a  
21  
22 wide consensus on testing tumor tissues for PD-L1 expression, it is limited by its  
23  
24 “unperfected dichotomy” across studies and molecules; patients with low levels of  
25  
26 PD-L1 expression have responded at rates of up to 17%, and roughly half of patients  
27  
28 are “not-responders” despite high tumor PD-L1 levels. Several factors could affect the  
29  
30 response and survival of patients receiving immunotherapy.(39) In addition to tumor  
31  
32 mutation loads and the expression of tumor antigens, the status of systemic  
33  
34 inflammation also occupies an important position in lung cancer patients receiving  
35  
36 immunotherapy. The tumor-associated cytokine and relevant signaling pathway could  
37  
38 be reflected by the level of systemic inflammation, which has been proven to be  
39  
40 associated with a worse survival in patients with solid tumors.(8) Biomarkers such as  
41  
42  
43  
44  
45  
46  
47  
48  
49  
50  
51  
52  
53  
54  
55  
56  
57  
58  
59  
60



1  
2  
3  
4 NLR, PLR, GPS and mGPS have been used as prognostic factors in lung cancer.(9-  
5  
6  
7 11) In addition, the role of systemic inflammation in patients receiving  
8  
9 immunotherapy is particularly important for their survival. Several studies have  
10  
11 explored the effect of pretreatment NLR on lung cancer patients receiving  
12  
13 immunotherapy.(31, 40-45) There are also two meta-analyses concerning  
14  
15 pretreatment NLR and survival in patients with advanced cancer. (46) (47) In  
16  
17 summary, NLR is a reliable prognostic factor for patients with various cancer types.  
18  
19  
20  
21  
22 Sacdalan, D. B. reported that an increased NLR resulted in a worse PFS among several  
23  
24 kinds of cancers, such as melanoma, non-small-cell lung cancer and genitourinary  
25  
26 cancer,(46) which was consistent with our results. However, only three publications  
27  
28 about lung cancer were enrolled in that meta-analysis, and a nonsignificant association  
29  
30 was discovered between pretreatment NLR and OS. In addition, two of the three studies  
31  
32 included in the meta-analysis previously mentioned only provided abstracts, and we  
33  
34 cannot obtain more details about those cohorts or study designs. Another meta-analysis  
35  
36 conducted by Jiang, T also revealed a trend similar to our results, but the results of the  
37  
38 subgroup analysis showed that posttreatment NLR was also significantly related to a  
39  
40 poorer OS and PFS, and this result was different from ours. We enrolled more research  
41  
42 articles in our study. In addition, we performed subgroup analyses stratified by more  
43  
44  
45  
46  
47  
48  
49  
50  
51  
52  
53  
54  
55  
56  
57  
58  
59  
60

1  
2  
3  
4 clinical factors. Furthermore, our results showed that the ethnicity, NLR level at  
5  
6 baseline and proportion of squamous cell carcinoma may affect the prognosis value of  
7  
8 the NLR. However, due to the high heterogeneity, the results must be interpreted with  
9  
10 caution. Neutrophils were the most abundant immune cell type identified in NSCLC  
11  
12 patients and accounted for nearly 20% of all CD45+ cells in patients from America.(48)  
13  
14 However, this result was not found in Asia or Europe. The systemic inflammatory  
15  
16 response might be different among different ethnicities. Furthermore, we collected  
17  
18 baseline patient information, including the proportion of squamous cell carcinoma,  
19  
20 from all studies, and our results showed that the histology of lung cancer might have an  
21  
22 impact on the prognosis value of NLR. However, the mechanism needs further  
23  
24 exploration, and many confounding factors could affect the systemic inflammatory  
25  
26 response.  
27  
28  
29  
30  
31  
32  
33

34  
35 The current research had several limitations. First, high heterogeneity was present in  
36  
37 this analysis although we conducted sensitivity analyses on all studies. The results  
38  
39 were robust after eliminating every study from a combination of HRs. In addition, we  
40  
41 performed subgroup analyses on some possible impact factors to detect the source of  
42  
43 heterogeneity. Second, the Egger's test showed that obvious publication bias was  
44  
45 present in this current study. The pooled results should be treated with caution  
46  
47  
48  
49  
50  
51  
52  
53  
54  
55  
56  
57  
58  
59  
60

1  
2  
3  
4 although a trim and fill analysis testing indicated credibility for this study.  
5

6 Additionally, considering the high heterogeneity after subgroup analysis, other factors  
7  
8 might be responsible for the high heterogeneity in this meta-analysis.  
9  
10

### 11 **Conclusion:**

12  
13  
14 Generally, our meta-analysis focused on the clinical prognostic agreement of NLR for  
15  
16 OS and PFS in lung cancer patients. Importantly, given the limitations mentioned  
17  
18 above, these findings should be treated with caution in clinical practice. More  
19  
20 prospective cohort studies are needed to test our results.  
21  
22  
23

### 24 **Contributorship statement:**

25  
26  
27 (I) Conception and design: W Li, J Jin, Lan Y; (II) Administrative support: J Jin, W Li;  
28  
29 (III) Provision of study materials or patients: D Liu; (IV) Collection and assembly of  
30  
31 data: J Jin, D Liu; (V) Data analysis and interpretation: D Liu, Lan Y; (VI)  
32  
33 Manuscript writing: All authors; (VII) Final approval of manuscript: All authors.  
34  
35  
36

### 37 **Competing interests**

38  
39  
40 The authors have no conflicts of interest to declare  
41  
42

### 43 **Funding**

44  
45  
46 None  
47

### 48 **Data sharing statement:**

1  
2  
3  
4 All data in the current study were available in published articles  
5

#### 6 **Acknowledgments:**

7  
8  
9 This work was supported by the Transformation Projects of Sci-Tech Achievements  
10  
11 of Sichuan Province (2016CZYD0001), the Sci-Tech Support Program of Science and  
12  
13 Technology Department of Sichuan Province (2016SZ0073), the National Major Sci-  
14  
15 Tech Project (2017ZX10103004-012) and the National Key Development Plan for  
16  
17 Precision Medicine Research (2017YFC0910004).  
18  
19  
20  
21

#### 22 **Compliance with Ethical Standards**

23  
24  
25 **Ethical approval:** All procedures performed in the studies involving human  
26  
27 participants were in accordance with the ethical standards of the institutional and/or  
28  
29 national research committee and with the 1964 Helsinki declaration and its later  
30  
31 amendment.  
32  
33

#### 34 **Reference:**

- 35  
36  
37 1. Siegel RL, Miller KD, Jemal A. Cancer statistics, 2015. *CA Cancer J Clin.* 2015;65(1):5-29.  
38  
39 2. Callahan MK, Postow MA, Wolchok JD. Targeting T Cell Co-receptors for Cancer Therapy. *Immunity.*  
40  
41 2016;44(5):1069-78.  
42  
43 3. Chen YM. Immune checkpoint inhibitors for nonsmall cell lung cancer treatment. *Journal of the*  
44  
45 *Chinese Medical Association Jcma.* 2016;80(1):7.  
46  
47 4. Yarchoan M, Hopkins A, Jaffee EM. Tumor Mutational Burden and Response Rate to PD-1  
48  
49 Inhibition. *The New England journal of medicine.* 2017;377(25):2500-1.  
50  
51 5. Anagnostou V, Smith KN, Forde PM, Niknafs N, Bhattacharya R, White J, et al. Evolution of  
52  
53 Neoantigen Landscape during Immune Checkpoint Blockade in Non-Small Cell Lung Cancer. *Cancer*  
54  
55 *discovery.* 2017;7(3):264-76.  
56  
57  
58  
59  
60

- 1
  - 2
  - 3
  - 4
  - 5
  - 6
  - 7
  - 8
  - 9
  - 10
  - 11
  - 12
  - 13
  - 14
  - 15
  - 16
  - 17
  - 18
  - 19
  - 20
  - 21
  - 22
  - 23
  - 24
  - 25
  - 26
  - 27
  - 28
  - 29
  - 30
  - 31
  - 32
  - 33
  - 34
  - 35
  - 36
  - 37
  - 38
  - 39
  - 40
  - 41
  - 42
  - 43
  - 44
  - 45
  - 46
  - 47
  - 48
  - 49
  - 50
  - 51
  - 52
  - 53
  - 54
  - 55
  - 56
  - 57
  - 58
  - 59
  - 60
6. Goswami S, Basu S, Sharma P. A potential biomarker for anti-PD-1 immunotherapy. *Nature medicine*. 2018;24(2):123-4.
7. Marchetti A, Barberis M, Franco R, De Luca G, Pace MV, Staibano S, et al. Multicenter Comparison of 22C3 PharmDx (Agilent) and SP263 (Ventana) Assays to Test PD-L1 Expression for NSCLC Patients to Be Treated with Immune Checkpoint Inhibitors. *Journal of thoracic oncology : official publication of the International Association for the Study of Lung Cancer*. 2017;12(11):1654-63.
8. Hooper CE, Lyburn ID, Searle J, Darby M, Hall T, Hall D, et al. The South West Area Mesothelioma and Pemetrexed trial: a multicentre prospective observational study evaluating novel markers of chemotherapy response and prognostication. *British journal of cancer*. 2015;112(7):1175-82.
9. Wang X, Teng F, Kong L, Yu J. Pretreatment neutrophil-to-lymphocyte ratio as a survival predictor for small-cell lung cancer. *OncoTargets and therapy*. 2016;9:5761-70.
10. Sanchez-Salcedo P, de-Torres JP, Martinez-Urbistondo D, Gonzalez-Gutierrez J, Berto J, Campo A, et al. The neutrophil to lymphocyte and platelet to lymphocyte ratios as biomarkers for lung cancer development. *Lung cancer (Amsterdam, Netherlands)*. 2016;97:28-34.
11. Kos M, Hoczade C, Kos FT, Uncu D, Karakas E, Dogan M, et al. Prognostic role of pretreatment platelet/lymphocyte ratio in patients with non-small cell lung cancer. *Wien Klin Wochenschr*. 2016;128(17-18):635-40.
12. Tierney JF, Stewart LA, Ghersi D, Burdett S, Sydes MR. Practical methods for incorporating summary time-to-event data into meta-analysis. *Trials*. 2007;8(1):16.
13. Begg CB, Mazumdar M. Operating characteristics of a rank correlation test for publication bias. *Biometrics*. 1994;50(4):1088.
14. O'Rourke K, Shea B, Wells GA. *Meta-Analysis of Clinical Trials*: Springer New York; 2001. 397-424 p.
15. Ren F, Zhao T, Liu B, Pan L. Neutrophil-lymphocyte ratio (NLR) predicted prognosis for advanced non-small-cell lung cancer (NSCLC) patients who received immune checkpoint blockade (ICB). *OncoTargets and therapy*. 2019;12:4235-44.
16. Pavan A, Calvetti L, Dal Maso A, Attili I, Del Bianco P, Pasello G, et al. Peripheral Blood Markers Identify Risk of Immune-Related Toxicity in Advanced Non-Small Cell Lung Cancer Treated with Immune-Checkpoint Inhibitors. *The oncologist*. 2019.
17. Passiglia F, Galvano A, Castiglia M, Incorvaia L, Calo V, Listi A, et al. Monitoring blood biomarkers to predict nivolumab effectiveness in NSCLC patients. *Therapeutic advances in medical oncology*. 2019;11:1758835919839928.
18. Minami S, Ihara S, Ikuta S, Komuta K. Gustave Roussy Immune Score and Royal Marsden Hospital Prognostic Score Are Biomarkers of Immune-Checkpoint Inhibitor for Non-Small Cell Lung Cancer. *World journal of oncology*. 2019;10(2):90-100.
19. Ichiki Y, Taira A, Chikaishi Y, Matsumiya H, Mori M, Kanayama M, et al. Prognostic factors of

1  
2  
3 advanced or postoperative recurrent non-small cell lung cancer targeted with immune check point  
4 inhibitors. *Journal of thoracic disease*. 2019;11(4):1117-23.

5  
6 20. Fukui T, Okuma Y, Nakahara Y, Otani S, Igawa S, Katagiri M, et al. Activity of Nivolumab and Utility  
7 of Neutrophil-to-Lymphocyte Ratio as a Predictive Biomarker for Advanced Non-Small-Cell Lung Cancer:  
8 A Prospective Observational Study. *Clinical lung cancer*. 2019;20(3):208-14.e2.

9  
10 21. Dusselier M, Deluche E, Delacourt N, Ballouhey J, Egenod T, Melloni B, et al. Neutrophil-to-  
11 lymphocyte ratio evolution is an independent predictor of early progression of second-line nivolumab-  
12 treated patients with advanced non-small-cell lung cancers. *PloS one*. 2019;14(7):e0219060.

13  
14 22. Zer A, Sung MR, Walia P, Khoja L, Maganti M, Labbe C, et al. Correlation of Neutrophil to  
15 Lymphocyte Ratio and Absolute Neutrophil Count With Outcomes With PD-1 Axis Inhibitors in Patients  
16 With Advanced Non-Small-Cell Lung Cancer. *Clinical lung cancer*. 2018;19(5):426-+.

17  
18 23. Takeda T, Takeuchi M, Saitoh M, Takeda S. Neutrophil-to-lymphocyte ratio after four weeks of  
19 nivolumab administration as a predictive marker in patients with pretreated non-small-cell lung cancer.  
20 *Thoracic cancer*. 2018;9(10):1291-9.

21  
22 24. Svaton M, Zemanova M, Skrickova J, Jakubikova L, Kolek V, Kultan J, et al. Chronic Inflammation  
23 as a Potential Predictive Factor of Nivolumab Therapy in Non-small Cell Lung Cancer. *Anticancer*  
24 *research*. 2018;38(12):6771-82.

25  
26 25. Suh KJ, Kim SH, Kim YJ, Kim M, Keam B, Kim TM, et al. Post-treatment neutrophil-to-lymphocyte  
27 ratio at week 6 is prognostic in patients with advanced non-small cell lung cancers treated with anti-  
28 PD-1 antibody. *Cancer Immunology Immunotherapy*. 2018;67(3):459-70.

29  
30 26. Shiroyama T, Suzuki H, Tamiya M, Tamiya A, Tanaka A, Okamoto N, et al. Pretreatment advanced  
31 lung cancer inflammation index (ALI) for predicting early progression in nivolumab-treated patients  
32 with advanced non-small cell lung cancer. *Cancer medicine*. 2018;7(1):13-20.

33  
34 27. Russo A, Franchina T, Ricciardi GRR, Battaglia A, Scimone A, Berenato R, et al. Baseline neutrophilia,  
35 derived neutrophil-to-lymphocyte ratio (dNLR), platelet-to-lymphocyte ratio (PLR), and outcome in non  
36 small cell lung cancer (NSCLC) treated with Nivolumab or Docetaxel. *Journal of cellular physiology*.  
37 2018;233(10):6337-43.

38  
39 28. Park W, Kwon D, Saravia D, Desai A, Vargas F, El Dinali M, et al. Developing a Predictive Model for  
40 Clinical Outcomes of Advanced Non-Small Cell Lung Cancer Patients Treated With Nivolumab. *Clinical*  
41 *lung cancer*. 2018;19(3):280-8.e4.

42  
43 29. Nakaya A, Kurata T, Yoshioka H, Takeyasu Y, Niki M, Kibata K, et al. Neutrophil-to-lymphocyte ratio  
44 as an early marker of outcomes in patients with advanced non-small-cell lung cancer treated with  
45 nivolumab. *International journal of clinical oncology*. 2018;23(4):634-40.

46  
47 30. Mezquita L, Auclin E, Ferrara R, Charrier M, Remon J, Planchard D, et al. Association of the Lung  
48 Immune Prognostic Index With Immune Checkpoint Inhibitor Outcomes in Patients With Advanced  
49 Non-Small Cell Lung Cancer. *JAMA oncology*. 2018;4(3):351-7.

- 1
  - 2
  - 3
  - 4
  - 5
  - 6
  - 7
  - 8
  - 9
  - 10
  - 11
  - 12
  - 13
  - 14
  - 15
  - 16
  - 17
  - 18
  - 19
  - 20
  - 21
  - 22
  - 23
  - 24
  - 25
  - 26
  - 27
  - 28
  - 29
  - 30
  - 31
  - 32
  - 33
  - 34
  - 35
  - 36
  - 37
  - 38
  - 39
  - 40
  - 41
  - 42
  - 43
  - 44
  - 45
  - 46
  - 47
  - 48
  - 49
  - 50
  - 51
  - 52
  - 53
  - 54
  - 55
  - 56
  - 57
  - 58
  - 59
  - 60
31. Maymani H, Hess K, Groisberg R, Hong DS, Naing A, Piha-Paul S, et al. Predicting outcomes in patients with advanced non-small cell lung cancer enrolled in early phase immunotherapy trials. *Lung cancer (Amsterdam, Netherlands)*. 2018;120:137-41.
32. Kiri T, Yamamoto M, Nagano T, Hazama D, Sekiya R, Katsurada M, et al. The time-series behavior of neutrophil-to-lymphocyte ratio is useful as a predictive marker in non-small cell lung cancer. *PLoS one*. 2018;13(2):e0193018.
33. Khunger M, Patil PD, Khunger A, Li M, Hu B, Rakshit S, et al. Post-treatment changes in hematological parameters predict response to nivolumab monotherapy in non-small cell lung cancer patients. *PLoS one*. 2018;13(10):e0197743.
34. Inomata M, Hirai T, Seto Z, Tokui K, Taka C, Okazawa S, et al. Clinical Parameters for Predicting the Survival in Patients with Squamous and Non-squamous-cell NSCLC Receiving PD-1 Inhibitor Therapy. *Pathology oncology research : POR*. 2018.
35. Facchinetti F, Veneziani M, Buti S, Gelsomino F, Squadrilli A, Bordi P, et al. Clinical and hematologic parameters address the outcomes of non-small-cell lung cancer patients treated with nivolumab. *Immunotherapy*. 2018;10(8):681-94.
36. Diem S, Schmid S, Krapf M, Flatz L, Born D, Jochum W, et al. Neutrophil-to-Lymphocyte ratio (NLR) and Platelet-to-Lymphocyte ratio (PLR) as prognostic markers in patients with non-small cell lung cancer (NSCLC) treated with nivolumab. *Lung cancer (Amsterdam, Netherlands)*. 2017;111:176-81.
37. Bagley SJ, Kothari S, Aggarwal C, Bauml JM, Alley EW, Evans TL, et al. Pretreatment neutrophil-to-lymphocyte ratio as a marker of outcomes in nivolumab-treated patients with advanced non-small-cell lung cancer. *Lung cancer (Amsterdam, Netherlands)*. 2017;106:1-7.
38. Ito A, Kondo S, Tada K, Kitano S. Clinical Development of Immune Checkpoint Inhibitors. *Biomed Res Int*. 2015;2015:605478.
39. Carbone DP, Reck M, Paz-Ares L, Creelan B, Horn L, Steins M, et al. First-Line Nivolumab in Stage IV or Recurrent Non-Small-Cell Lung Cancer. *The New England journal of medicine*. 2017;376(25):2415-26.
40. Mezquita L, Auclin E, Ferrara R, Charrier M, Remon J, Planchard D, et al. Association of the Lung Immune Prognostic Index With Immune Checkpoint Inhibitor Outcomes in Patients With Advanced Non-Small Cell Lung Cancer. *JAMA Oncol*. 2018;4(3):351-7.
41. Nakaya A, Kurata T, Yoshioka H, Takeyasu Y, Niki M, Kibata K, et al. Neutrophil-to-lymphocyte ratio as an early marker of outcomes in patients with advanced non-small-cell lung cancer treated with nivolumab. *Int J Clin Oncol*. 2018.
42. Zer A, Sung MR, Walia P, Khoja L, Maganti M, Labbe C, et al. Correlation of Neutrophil to Lymphocyte Ratio and Absolute Neutrophil Count With Outcomes With PD-1 Axis Inhibitors in Patients With Advanced Non-Small-Cell Lung Cancer. *Clin Lung Cancer*. 2018.
43. Park W, Kwon D, Saravia D, Desai A, Vargas F, El Dinali M, et al. Developing a Predictive Model for

1  
2  
3 Clinical Outcomes of Advanced Non-Small Cell Lung Cancer Patients Treated With Nivolumab. *Clinical*  
4 *Lung Cancer*. 2018;19(3):280-8.e4.

5  
6 44. Fukui T, Okuma Y, Nakahara Y, Otani S, Igawa S, Katagiri M, et al. Activity of Nivolumab and Utility  
7 of Neutrophil-to-Lymphocyte Ratio as a Predictive Biomarker for Advanced Non-Small-Cell Lung Cancer:  
8 A Prospective Observational Study. *Clinical Lung Cancer*. 2018.

9  
10 45. Russo A, Franchina T, Ricciardi GRR, Battaglia A, Scimone A, Berenato R, et al. Baseline neutrophilia,  
11 derived neutrophil-to-lymphocyte ratio (dNLR), platelet-to-lymphocyte ratio (PLR), and outcome in non  
12 small cell lung cancer (NSCLC) treated with Nivolumab or Docetaxel. *J Cell Physiol*. 2018.

13  
14 46. Sacdalan DB, Lucero JA, Sacdalan DL. Prognostic utility of baseline neutrophil-to-lymphocyte ratio  
15 in patients receiving immune checkpoint inhibitors: a review and meta-analysis. *OncoTargets and*  
16 *therapy*. 2018;11:955-65.

17  
18 47. Jiang T, Bai Y, Zhou F, Li W, Gao G, Su C, et al. Clinical value of neutrophil-to-lymphocyte ratio in  
19 patients with non-small-cell lung cancer treated with PD-1/PD-L1 inhibitors. *Lung cancer (Amsterdam,*  
20 *Netherlands)*. 2019;130:76-83.

21  
22 48. Kargl J, Busch SE, Yang GH, Kim KH, Hanke ML, Metz HE, et al. Neutrophils dominate the immune  
23 cell composition in non-small cell lung cancer. *Nature communications*. 2017;8:14381.

## 24 25 26 27 **Figure Legends**

28  
29  
30 Figure 1 Flow chart of study selection

31  
32  
33 Figure 2 Forest plot of the association between NLR and OS in patients with lung  
34  
35 cancer receiving immunotherapy

36  
37  
38 Figure 3 Subgroup analysis of the relationship NLR and OS in patients with lung  
39  
40 cancer receiving immunotherapy

41  
42  
43 Abbreviation: ICI: Immune-Checkpoint Inhibitor; M/F: male/female; SCC%:

44  
45 Proportion of Squamous cell carcinoma;※: the data here shows the proportion of  
46  
47 patients whose NLR baseline levels exceeded the cutoff value; N: Nivolumab; P:



Pembrolizumab; D: Durvalumab; E: Embrolizumab; A: Atezolizumab

Figure 4 Forest plot of the association between NLR and PFS in patients with lung cancer receiving immunotherapy

Figure 5 Subgroup analysis of the relationship NLR and PFS in patients with lung cancer receiving immunotherapy

Abbreviation: ICI: Immune-Checkpoint Inhibitor; M/F: male/female; SCC%:

Proportion of Squamous cell carcinoma;※: 15 studies (20 researches) provided the data for pretreatment NLR and PFS, and 5 of them also provided posttreatment NLR and PFS; N: Nivolumab; P: Pembrolizumab; D: Durvalumab; E: Embrolizumab; A: Atezolizumab

Figure 6 Sensitivity analysis on OS (A) and PFS (B)

## Table

Table 1 The basic characteristic of enrolled studies

| Study      | Year | Country | Ethnicity | Sample size | MFP  | M/F    | NLR at baseline |
|------------|------|---------|-----------|-------------|------|--------|-----------------|
| Russo A    | 2018 | Italy   | European  | 28          | 17   | 25/3   | NM              |
| Zer A      | 2018 | America | American  | 88          | 5.3  | 43/45  | NLR > 4:56.8%   |
| Nakaya A   | 2018 | Japan   | Asian     | 101         | 8.9  | 77/24  | NLR ≥ 3:46.5%   |
| Maymani H  | 2018 | America | American  | 74          | 12.3 | 36/38  | NLR > 6:20.3%   |
| Mezquita L | 2018 | Europe  | European  | 161         | 12   | 100/61 | NLR > 3:39%     |
| Diem S     | 2017 | Europe  | European  | 52          | NM   | 29/23  | 5.0(2.7-8.3) *  |
| Bagley SJ  | 2017 | America | American  | 175         | NM   | 80/95  | NLR ≥ 5:58%     |
| Fukui T    | 2018 | Japan   | Asian     | 52          | 10.9 | 37/15  | NLR ≥ 5:34.6%   |
| Park W     | 2018 | America | American  | 159         | 11.5 | 82/77  | 4.3(0.5-24.1) * |
| Ren, F     | 2019 | China   | Asian     | 147         | 2.6  | 94/53  | NLR > 2.5:59.9% |

1  
2  
3  
4  
5  
6  
7  
8  
9  
10  
11  
12  
13  
14  
15  
16  
17  
18  
19  
20  
21  
22  
23  
24  
25  
26  
27  
28  
29  
30  
31  
32  
33  
34  
35  
36  
37  
38  
39  
40  
41  
42  
43  
44  
45  
46  
47  
48  
49  
50  
51  
52  
53  
54  
55  
56  
57  
58  
59  
60

|                            |      |                |          |       |      |        |                    |
|----------------------------|------|----------------|----------|-------|------|--------|--------------------|
| <b>Pavan, A</b>            | 2019 | Italy          | European | 184   | 56.3 | 125/59 | NLR $\geq$ 3:57.5% |
| <b>Passiglia, F</b>        | 2019 | Italy          | European | 45    | 9.1  | 32/13  | NLR $>$ 3.3:51.1%  |
| <b>Minami, S</b>           | 2019 | Japan          | Asian    | 76    | NM   | 49/27  | NLR $\geq$ 6:14.5% |
| <b>Ichiki, Y.</b>          | 2019 | Japan          | Asian    | 44    | 4.83 | 38/6   | NM                 |
| <b>Dusselier, M.</b>       | 2019 | France         | European | 59    | NM   | 44/15  | NLR $>$ 5:62.7%    |
| <b>Takeda, T.</b>          | 2018 | Japan          | Asian    | 30    | NM   | 19/11  | NLR $>$ 5:30%      |
| <b>Svaton, M</b>           | 2018 | Czech Republic | European | 120   | NM   | 71/49  | NLR $>$ 3.8:50%    |
| <b>Suh, Koung Jin</b>      | 2018 | Korea          | Asian    | 54    | 26.2 | 42/12  | NLR $>$ 5:14.8%    |
| <b>Shiroyama, Takayuki</b> | 2018 | Japan          | Asian    | 201   | 12.4 | 135/66 | NLR $>$ 4:39.3%    |
| <b>Kiriu, T</b>            | 2018 | Japan          | Asian    | 19.00 | NM   | 19     | NLR $>$ 5:31.6%    |
| <b>Khunger, M</b>          | 2018 | America        | American | 109   | 30   | 56/53  | NLR $\geq$ 5:50.5% |
| <b>Inomata, M</b>          | 2018 | Japan          | Asian    | 36    | NM   | 27/9   | NLR $\geq$ 5:44.4% |
| <b>Facchinetti, F</b>      | 2018 | Italy          | European | 54    | 12.6 | 45/9   | NM                 |

| <b>Study</b>               | <b>SCC%</b> | <b>Treatment lines</b>       | <b>Outcome</b> | <b>Study design</b> | <b>Cut-off</b> | <b>IO</b> |
|----------------------------|-------------|------------------------------|----------------|---------------------|----------------|-----------|
| <b>Russo A</b>             | 60.71%      | at least second line therapy | OS/PFS         | RO                  | 3              | N         |
| <b>Zer A</b>               | 17.05%      | at least second line therapy | OS/PFS/DCR     | RO                  | 4              | NM        |
| <b>Nakaya A</b>            | 36.63%      | at least second line therapy | PFS/irAEs      | RO                  | 3              | N         |
| <b>Maymani H</b>           | 16.22%      | including first line therapy | OS/PFS         | RO                  | 6              | N/P/D     |
| <b>Mezquita L</b>          | 28.57%      | at least second line therapy | OS/PFS         | RO                  | 3              | N/E/A/D   |
| <b>Diem S</b>              | 34.62%      | including first line therapy | OS/PFS         | RO                  | 5              | N         |
| <b>Bagley SJ</b>           | 24.00%      | at least second line therapy | OS/PFS         | RO                  | 5              | N         |
| <b>Fukui T</b>             | 30.77%      | at least second line therapy | OS/PFS/irAEs   | PO                  | 5              | N         |
| <b>Park W</b>              | 24.53%      | including first line therapy | OS/PFS         | RO                  | 5              | N         |
| <b>Ren, F</b>              | 42.18%      | at least second line therapy | OS/PFS         | RO                  | 2.5            | N/P       |
| <b>Pavan, A</b>            | 32.07%      | including first line therapy | OS/PFS/irAEs   | RO                  | 3              | N/P/A     |
| <b>Passiglia, F</b>        | 44.44%      | at least second line therapy | OS/TTP         | RO                  | 3.3            | N         |
| <b>Minami, S</b>           | 23.68%      | at least second line therapy | OS/PFS         | RO                  | 6              | N/P/A     |
| <b>Ichiki, Y.</b>          | 65.91%      | including first line therapy | OS/PFS/irAEs   | RO                  | NM             | N/P       |
| <b>Dusselier, M.</b>       | 20.34%      | at least second line therapy | OS             | RO                  | 5              | N         |
| <b>Takeda, T.</b>          | 30.00%      | at least second line therapy | PFS            | RO                  | 5              | N         |
| <b>Svaton, M</b>           | 33.33%      | at least second line therapy | OS/PFS         | RO                  | 3.8            | N         |
| <b>Suh, Koung Jin</b>      | 31.48%      | including first line therapy | OS/PFS/irAEs   | RO                  | 5              | N/P       |
| <b>Shiroyama, Takayuki</b> | 30.35%      | at least second line therapy | PFS/RR         | RO                  | 4              | N         |

1  
2  
3  
4  
5  
6  
7  
8  
9  
10  
11  
12  
13  
14  
15  
16  
17  
18  
19  
20  
21  
22  
23  
24  
25  
26  
27  
28  
29  
30  
31  
32  
33  
34  
35  
36  
37  
38  
39  
40  
41  
42  
43  
44  
45  
46  
47  
48  
49  
50  
51  
52  
53  
54  
55  
56  
57  
58  
59  
60

|                       |        |                              |               |    |   |     |
|-----------------------|--------|------------------------------|---------------|----|---|-----|
| <b>Kiri, T</b>        | 31.58% | at least second line therapy | OS/PFS/TTF    | RO | 5 | N   |
| <b>Khunger, M</b>     | 23.85% | at least second line therapy | OS            | RO | 5 | N   |
| <b>Inomata, M</b>     | 44.44% | at least second line therapy | PFS           | RO | 5 | N/P |
| <b>Facchinetti, F</b> | 48.15% | at least second line therapy | OS/PFS/TTF/DP | PO | 4 | N   |

Abbreviation: NLR: neutrophil to lymphocyte ratio; NM: not mentioned; M/F: male/female; MFP: Median follow-up (month); SCC%: Proportion of Squamous cell carcinoma; IO: immunotherapy; N: Nivolumab; P: Pembrolizumab; D: Durvalumab; E: Embrolizumab; A: Atezolizumab; OS: overall survival; PFS: progress free survival; DCR: disease control rate; irAEs: immune-related adverse events; RR: response rate; TTF: treatment failure; RO: retrospective studies; PO: prospective studies; NOS: Ottawa quality assessment Scale; \*: the study just provided the median number and the range of NLR at baseline.

### Supporting information

S1File. PRISMA 2009 checklist.

S2 Search strategy. This file provides a full electronic search strategy for PubMed

S3 Figure1 Trim and fill analysis on the data of OS and PFS

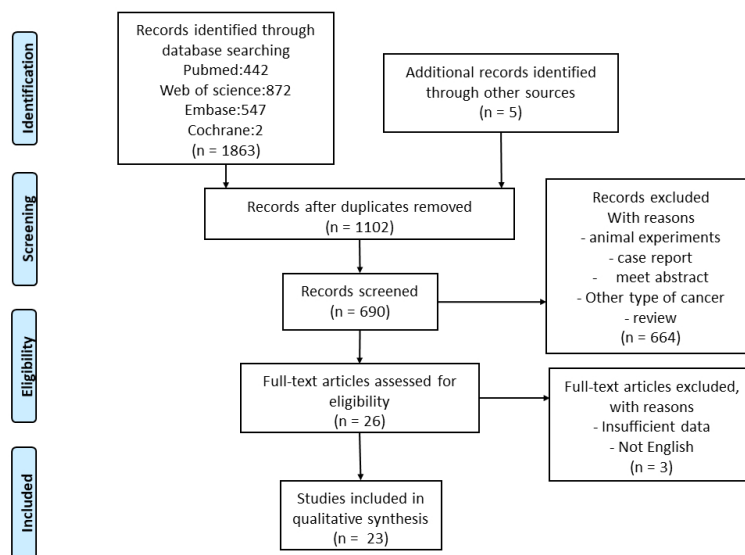

Figure 1 Flow chart of study selection

338x190mm (96 x 96 DPI)

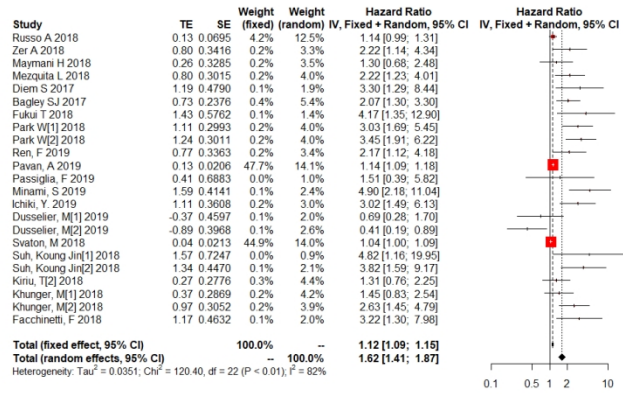

Figure 2 Forest plot of the association between NLR and OS in patients with lung cancer receiving immunotherapy

396x246mm (96 x 96 DPI)

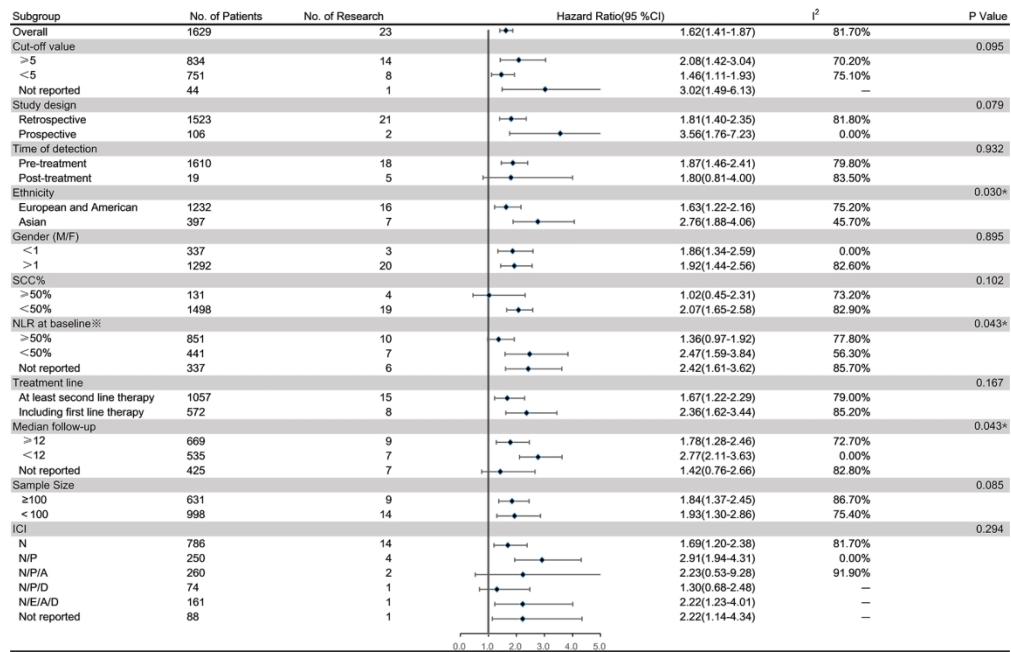

Subgroup analysis of the relationship NLR and OS in patients with lung cancer receiving immunotherapy  
 Abbreviation: ICI: Immune-Checkpoint Inhibitor; M/F: male/female; SCC%: Proportion of Squamous cell carcinoma; \*\*: the data here shows the proportion of patients whose NLR baseline levels exceeded the cutoff value; N: Nivolumab; P: Pembrolizumab; D: Durvalumab; E: Embrolizumab; A: Atezolizumab

154x99mm (300 x 300 DPI)

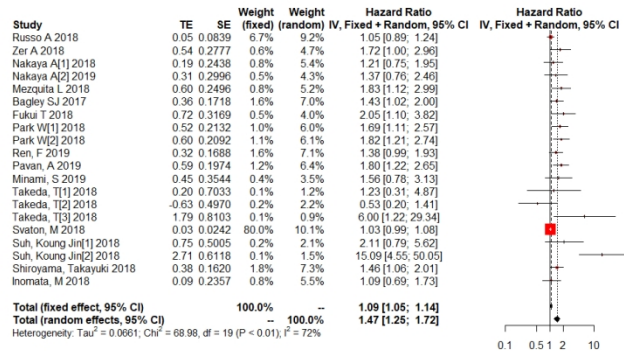

Figure 4 Forest plot of the association between NLR and PFS in patients with lung cancer receiving immunotherapy

396x246mm (96 x 96 DPI)

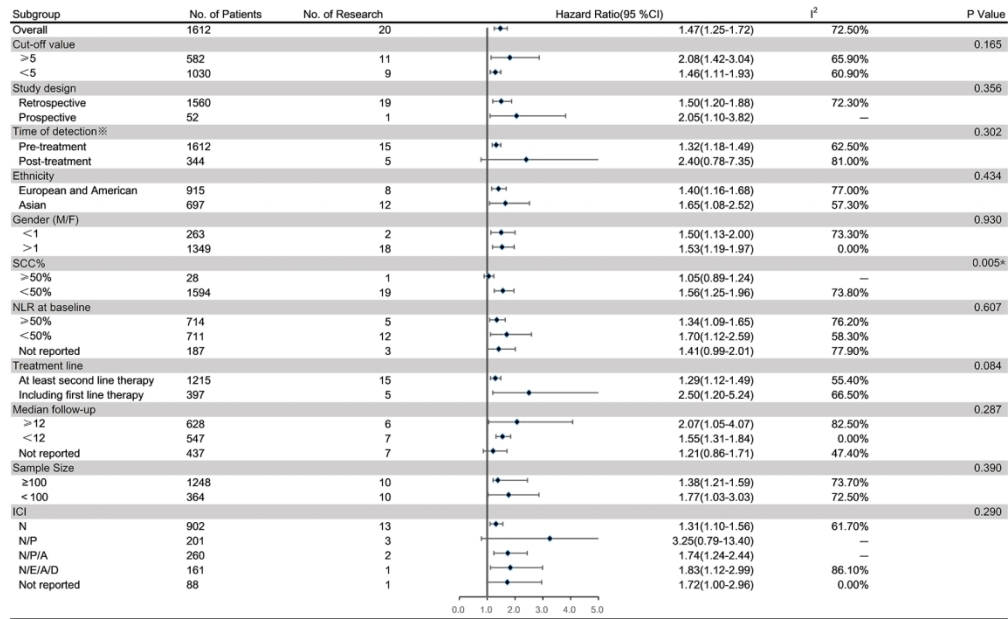

Subgroup analysis of the relationship NLR and PFS in patients with lung cancer receiving immunotherapy  
 Abbreviation: ICI: Immune-Checkpoint Inhibitor; M/F: male/female; SCC%: Proportion of Squamous cell carcinoma;※: 15 studies (20 researches) provided the data for pretreatment NLR and PFS, and 5 of them also provided posttreatment NLR and PFS; N: Nivolumab; P: Pembrolizumab; D: Durvalumab; E: Embrolizumab; A: Atezolizumab

162x99mm (300 x 300 DPI)



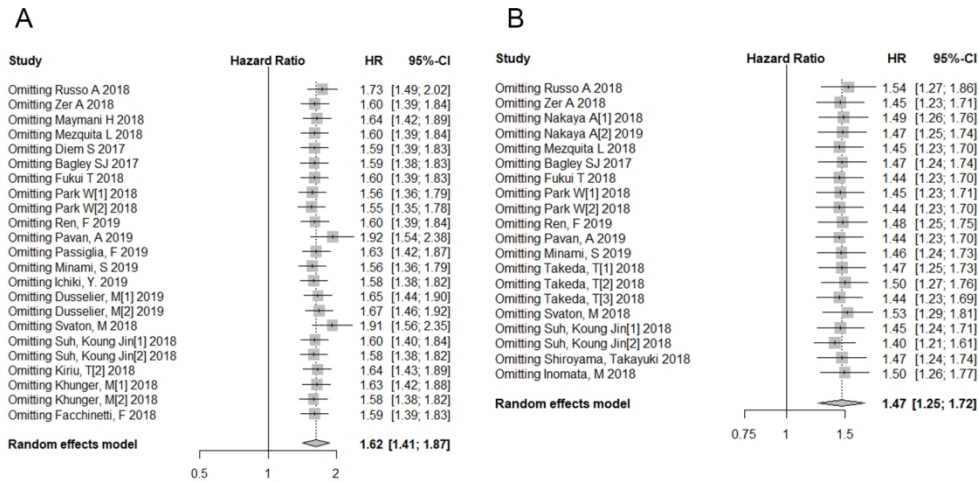

Figure 6 Sensitivity analysis on OS (A) and PFS (B)

143x74mm (300 x 300 DPI)

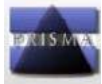

# PRISMA 2009 Checklist

| Section/topic                      | #  | Checklist item                                                                                                                                                                                                                                                                                              | Reported on page #  |
|------------------------------------|----|-------------------------------------------------------------------------------------------------------------------------------------------------------------------------------------------------------------------------------------------------------------------------------------------------------------|---------------------|
| <b>TITLE</b>                       |    |                                                                                                                                                                                                                                                                                                             |                     |
| Title                              | 1  | Identify the report as a systematic review, meta-analysis, or both.                                                                                                                                                                                                                                         | 1                   |
| <b>ABSTRACT</b>                    |    |                                                                                                                                                                                                                                                                                                             |                     |
| Structured summary                 | 2  | Provide a structured summary including, as applicable: background; objectives; data sources; study eligibility criteria, participants, and interventions; study appraisal and synthesis methods; results; limitations; conclusions and implications of key findings; systematic review registration number. | 2-3                 |
| <b>INTRODUCTION</b>                |    |                                                                                                                                                                                                                                                                                                             |                     |
| Rationale                          | 3  | Describe the rationale for the review in the context of what is already known.                                                                                                                                                                                                                              | 4                   |
| Objectives                         | 4  | Provide an explicit statement of questions being addressed with reference to participants, interventions, comparisons, outcomes, and study design (PICOS).                                                                                                                                                  | 5                   |
| <b>METHODS</b>                     |    |                                                                                                                                                                                                                                                                                                             |                     |
| Protocol and registration          | 5  | Indicate if a review protocol exists, if and where it can be accessed (e.g., Web address), and, if available, provide registration information including registration number.                                                                                                                               | 5-6                 |
| Eligibility criteria               | 6  | Specify study characteristics (e.g., PICOS, length of follow-up) and report characteristics (e.g., years considered, language, publication status) used as criteria for eligibility, giving rationale.                                                                                                      | 6                   |
| Information sources                | 7  | Describe all information sources (e.g., databases with dates of coverage, contact with study authors to identify additional studies) in the search and date last searched.                                                                                                                                  | 5                   |
| Search                             | 8  | Present full electronic search strategy for at least one database, including any limits used, such that it could be repeated.                                                                                                                                                                               | 5-6 and supplements |
| Study selection                    | 9  | State the process for selecting studies (i.e., screening, eligibility, included in systematic review, and, if applicable, included in the meta-analysis).                                                                                                                                                   | 5-8                 |
| Data collection process            | 10 | Describe method of data extraction from reports (e.g., piloted forms, independently, in duplicate) and any processes for obtaining and confirming data from investigators.                                                                                                                                  | 6-7                 |
| Data items                         | 11 | List and define all variables for which data were sought (e.g., PICOS, funding sources) and any assumptions and simplifications made.                                                                                                                                                                       | 6                   |
| Risk of bias in individual studies | 12 | Describe methods used for assessing risk of bias of individual studies (including specification of whether this was done at the study or outcome level), and how this information is to be used in any data synthesis.                                                                                      | 8                   |
| Summary measures                   | 13 | State the principal summary measures (e.g., risk ratio, difference in means).                                                                                                                                                                                                                               | 7-8                 |
| Synthesis of results               | 14 | Describe the methods of handling data and combining results of studies, if done, including measures of consistency (e.g., $I^2$ ) for each meta-analysis.                                                                                                                                                   | 7-8                 |

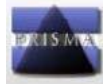

# PRISMA 2009 Checklist

1  
2  
3  
4  
5  
6  
7  
8  
9  
10  
11  
12  
13  
14  
15  
16  
17  
18  
19  
20  
21  
22  
23  
24  
25  
26  
27  
28  
29  
30  
31  
32  
33  
34  
35  
36  
37  
38  
39  
40  
41  
42  
43  
44  
45  
46  
47

| Section/topic                 | #  | Checklist item                                                                                                                                                                                           | Reported on page # |
|-------------------------------|----|----------------------------------------------------------------------------------------------------------------------------------------------------------------------------------------------------------|--------------------|
| Risk of bias across studies   | 15 | Specify any assessment of risk of bias that may affect the cumulative evidence (e.g., publication bias, selective reporting within studies).                                                             | 8                  |
| Additional analyses           | 16 | Describe methods of additional analyses (e.g., sensitivity or subgroup analyses, meta-regression), if done, indicating which were pre-specified.                                                         | 8                  |
| <b>RESULTS</b>                |    |                                                                                                                                                                                                          |                    |
| Study selection               | 17 | Give numbers of studies screened, assessed for eligibility, and included in the review, with reasons for exclusions at each stage, ideally with a flow diagram.                                          | 8-9                |
| Study characteristics         | 18 | For each study, present characteristics for which data were extracted (e.g., study size, PICOS, follow-up period) and provide the citations.                                                             | 9-10               |
| Risk of bias within studies   | 19 | Present data on risk of bias of each study and, if available, any outcome level assessment (see item 12).                                                                                                | 11-12              |
| Results of individual studies | 20 | For all outcomes considered (benefits or harms), present, for each study: (a) simple summary data for each intervention group (b) effect estimates and confidence intervals, ideally with a forest plot. | 8-11               |
| Synthesis of results          | 21 | Present results of each meta-analysis done, including confidence intervals and measures of consistency.                                                                                                  | 8-11               |
| Risk of bias across studies   | 22 | Present results of any assessment of risk of bias across studies (see Item 15).                                                                                                                          | 11-12              |
| Additional analysis           | 23 | Give results of additional analyses, if done (e.g., sensitivity or subgroup analyses, meta-regression [see Item 16]).                                                                                    | 12                 |
| <b>DISCUSSION</b>             |    |                                                                                                                                                                                                          |                    |
| Summary of evidence           | 24 | Summarize the main findings including the strength of evidence for each main outcome; consider their relevance to key groups (e.g., healthcare providers, users, and policy makers).                     | 12-13              |
| Limitations                   | 25 | Discuss limitations at study and outcome level (e.g., risk of bias), and at review-level (e.g., incomplete retrieval of identified research, reporting bias).                                            | 15-16              |
| Conclusions                   | 26 | Provide a general interpretation of the results in the context of other evidence, and implications for future research.                                                                                  | 16                 |
| <b>FUNDING</b>                |    |                                                                                                                                                                                                          |                    |
| Funding                       | 27 | Describe sources of funding for the systematic review and other support (e.g., supply of data); role of funders for the systematic review.                                                               | 17                 |

From: Moher D, Liberati A, Tetzlaff J, Altman DG, The PRISMA Group (2009). Preferred Reporting Items for Systematic Reviews and Meta-Analyses: The PRISMA Statement. PLoS Med 6(7): e1000097. doi:10.1371/journal.pmed1000097

For more information, visit: [www.prisma-statement.org](http://www.prisma-statement.org).

**Supplement Table1 Search strategy for meta-analysis of Correlation of the neutrophil to lymphocyte ratio and clinical outcomes in lung cancer patients receiving immunotherapy: a meta-analysis (PubMed via NLM)**

|   |                                                                                                                                                                                                                                                                                                                                                                                                                                                 |
|---|-------------------------------------------------------------------------------------------------------------------------------------------------------------------------------------------------------------------------------------------------------------------------------------------------------------------------------------------------------------------------------------------------------------------------------------------------|
|   | <b>Search terms: <i>neutrophil to lymphocyte ratio and lung cancer patients with immunotherapy</i></b>                                                                                                                                                                                                                                                                                                                                          |
|   | <b><i>Population: persons with lung cancer receiving immunotherapy</i></b>                                                                                                                                                                                                                                                                                                                                                                      |
| 1 | (((((Cancer of Lung) OR Pulmonary Neoplasms) OR Neoplasms, Lung) OR Lung Neoplasm) OR Neoplasm, Lung) OR Neoplasms, Pulmonary) OR Neoplasm, Pulmonary) OR Pulmonary Neoplasm) OR Lung Cancer) OR Cancer, Lung) OR Cancers, Lung) OR Lung Cancers) OR Pulmonary Cancer) OR Cancer, Pulmonary) OR Cancers, Pulmonary) OR Pulmonary Cancers) OR Cancer of the Lung) OR "Lung Neoplasms"[Mesh]))) AND (("Immunotherapy"[Mesh]) AND Immunotherapies) |
|   | <b><i>Intervention (Expose): neutrophil to lymphocyte ratio</i></b>                                                                                                                                                                                                                                                                                                                                                                             |
| 2 | ((NLR) OR (neutrophil to lymphocyte ratio) OR neutrophil lymphocyte ratio))                                                                                                                                                                                                                                                                                                                                                                     |
|   | <b><i>Combined sets</i></b>                                                                                                                                                                                                                                                                                                                                                                                                                     |
| 3 | 1 and 2                                                                                                                                                                                                                                                                                                                                                                                                                                         |
|   | <b><i>Limits</i></b>                                                                                                                                                                                                                                                                                                                                                                                                                            |
| 4 | 3 AND English [Language]                                                                                                                                                                                                                                                                                                                                                                                                                        |

[Mesh] = Term from the Medline controlled vocabulary, including terms found below this term in the Mesh hierarchy

# BMJ Open

## Association of the neutrophil to lymphocyte ratio and clinical outcomes in lung cancer patients receiving immunotherapy: a meta-analysis

|                                 |                                                                                                                                                                                                                   |
|---------------------------------|-------------------------------------------------------------------------------------------------------------------------------------------------------------------------------------------------------------------|
| Journal:                        | <i>BMJ Open</i>                                                                                                                                                                                                   |
| Manuscript ID                   | bmjopen-2019-035031.R1                                                                                                                                                                                            |
| Article Type:                   | Original research                                                                                                                                                                                                 |
| Date Submitted by the Author:   | 14-Feb-2020                                                                                                                                                                                                       |
| Complete List of Authors:       | Jin, Jing; Sichuan University West China Hospital<br>Yang, Lan; Sichuan University West China Hospital<br>Liu, Dan; Sichuan University West China Hospital<br>Li, Weimin; Sichuan University West China Hospital, |
| <b>Primary Subject Heading</b>: | Oncology                                                                                                                                                                                                          |
| Secondary Subject Heading:      | Respiratory medicine                                                                                                                                                                                              |
| Keywords:                       | Immunology < BASIC SCIENCES, Epidemiology < ONCOLOGY, Respiratory tract tumours < ONCOLOGY                                                                                                                        |
|                                 |                                                                                                                                                                                                                   |

SCHOLARONE™  
Manuscripts

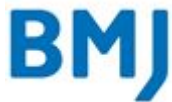

I, the Submitting Author has the right to grant and does grant on behalf of all authors of the Work (as defined in the below author licence), an exclusive licence and/or a non-exclusive licence for contributions from authors who are: i) UK Crown employees; ii) where BMJ has agreed a CC-BY licence shall apply, and/or iii) in accordance with the terms applicable for US Federal Government officers or employees acting as part of their official duties; on a worldwide, perpetual, irrevocable, royalty-free basis to BMJ Publishing Group Ltd ("BMJ") its licensees and where the relevant Journal is co-owned by BMJ to the co-owners of the Journal, to publish the Work in this journal and any other BMJ products and to exploit all rights, as set out in our [licence](#).

The Submitting Author accepts and understands that any supply made under these terms is made by BMJ to the Submitting Author unless you are acting as an employee on behalf of your employer or a postgraduate student of an affiliated institution which is paying any applicable article publishing charge ("APC") for Open Access articles. Where the Submitting Author wishes to make the Work available on an Open Access basis (and intends to pay the relevant APC), the terms of reuse of such Open Access shall be governed by a Creative Commons licence – details of these licences and which [Creative Commons](#) licence will apply to this Work are set out in our licence referred to above.

Other than as permitted in any relevant BMJ Author's Self Archiving Policies, I confirm this Work has not been accepted for publication elsewhere, is not being considered for publication elsewhere and does not duplicate material already published. I confirm all authors consent to publication of this Work and authorise the granting of this licence.

1  
2  
3  
4 1 **Association of the neutrophil to lymphocyte ratio and clinical**  
5  
6 2 **outcomes in lung cancer patients receiving immunotherapy: a**  
7  
8  
9 3 **meta-analysis**  
10  
11  
12 4

13  
14 5 **Jing Jin<sup>1</sup>, Lan Yang<sup>1</sup>, Dan Liu<sup>1</sup>, Wei-Min Li<sup>1\*</sup>**  
15

16  
17 6 1. Department of Pulmonary & Critical Care, West China Hospital, Sichuan  
18  
19 7 University, Chengdu 610041, China.  
20  
21

22 8 **Running title:** Neutrophil to lymphocyte ratio and lung cancer  
23

24  
25 9 **Address correspondence to:** Dr. Wei-Min Li, Department of Pulmonary & Critical  
26  
27 10 Care, West China Hospital, Sichuan University, Chengdu 610041, China. Tel: +86 (028)  
28  
29 11 85423998; E-mail: [weimin003@yahoo.com](mailto:weimin003@yahoo.com)  
30  
31

32 12

33  
34  
35 13

36  
37  
38 14

39  
40 15

41  
42  
43 16

44  
45  
46 17

47  
48 18  
49  
50  
51  
52  
53  
54  
55  
56  
57  
58  
59  
60

1  
2  
3  
4 **Abstract:**

5  
6 **Objectives:** To explore the relationship between the pretreatment or posttreatment  
7  
8  
9  
10  
11  
12  
13  
14  
15  
16  
17  
18  
19  
20  
21  
22  
23  
24  
25  
26  
27  
28  
29  
30  
31  
32  
33  
34  
35  
36  
37  
38  
39  
40  
41  
42  
43  
44  
45  
46  
47  
48  
49  
50  
51  
52  
53  
54  
55  
56  
57  
58  
59  
60  
neutrophil to lymphocyte ratio (NLR) and overall survival (OS)/ progression-free  
survival (PFS) in lung cancer patients receiving immunotherapy.

**Design:** We searched several databases to collect relevant studies conducted until July  
2019. We carefully reviewed the full text of the included publications and combined  
the hazard ratios (HRs) and 95% confidence intervals (CIs) to assess the association  
between the NLR and survival time in lung cancer patients receiving immunotherapy.

**Data Sources:** PubMed, the Cochrane Library, Embase and Web of Science

**Eligibility Criteria:** Studies reporting the prognostic value of the NLR in lung cancer  
patients receiving immunotherapy were enrolled.

**Data extraction and synthesis:** Basic information on the articles and patients(NLR  
cutoff value, NLR at baseline, and HRs with 95% CIs for OS and PFS) was extracted  
by two authors independently. The pooled HRs of OS and PFS were synthesized  
using the random effects or fixed effects model.

**Results:** Twenty-three studies with 2068 patients were enrolled. Among all patients,  
1305 (64.0%) were males, and 643 (31.4%) were diagnosed with squamous cell  
carcinoma. In a pooled analysis of OS and PFS from all studies, an elevated NLR



1 predicted poor OS (HR=1.62; 95% CI: 1.41-1.87; P< 0.001) and PFS (HR=1.47; 95%  
2 CI: 1.25-1.72; P< 0.0001). Subgroup analyses stratified showed that the posttreatment  
3 NLR was not significantly related to OS and that patients in Asia had significantly  
4 higher HRs than those in Europe and America. Furthermore, the proportion of  
5 squamous cell carcinoma and baseline NLR could affect the prognostic value of the  
6 NLR.

7 **Conclusions:** Our study found that an elevated NLR was associated with poor OS and  
8 PFS in lung cancer patients receiving immunotherapy and that several clinical factors  
9 might have an impact on the predictive value of the NLR in the survival of lung  
10 cancer patients.

### 11 **Strengths and limitations of this study**

12 **1. Verification of the prognostic value of the NLR in a large number of lung**  
13 **cancer patients who received immunotherapy**

14 **2. Different clinical characteristics could affect the prognostic value of the NLR**

15 **3. High heterogeneity was present in this analysis**

16 **Keywords:** NLR; systemic inflammation; prognostic markers; lung cancer

17

18

## 1 **Introduction:**

2 Lung cancer is the most prevalent cancer and life-threatening malignancy  
3 worldwide.(1) The pathogenesis of lung cancer is complicated, and the primary  
4 treatments for lung cancer patients are surgery and chemotherapy. Unfortunately,  
5 most patients with lung cancer are diagnosed at advanced stages, and the benefits  
6 achieved from chemotherapy in advanced lung cancer patients are relatively small.  
7 Recently, many studies have revealed that tumor cells can evade the antitumor  
8 responses of T cells by controlling the combined responses of programmed cell death  
9 protein 1 (PD-1) and programmed cell death ligand-1 (PD-L1).(2) Nivolumab,  
10 pembrolizumab, atezolizumab, durvalumab, ipilimumab and tremelimumab have  
11 successfully changed clinical experiences in lung cancer treatment.(3) Tumor  
12 mutational burden,(4) neoantigens(5) and classical monocytes in the peripheral  
13 blood(6) and PD-L1 expression on tumor cells in particular, (7) are effective  
14 predictive biomarkers for immune checkpoint therapy in lung cancer. Systemic  
15 inflammation in cancer patients is believed to influence the growth and migration of  
16 tumors via certain inflammatory factors.(8) An elevated level of systemic  
17 inflammation, including Glasgow prognostic score (GPS), neutrophil to lymphocyte  
18 ratio (NLR), platelet to lymphocyte ratio (PLR), and C-reactive protein to albumin

1 ratio (CAR), have been indicated to be associated with poor survival in patients with  
2 solid tumors.(9-11) However, data on the prognostic value of the pretreatment NLR in  
3 lung cancer patients receiving immunotherapy remain scarce and inconsistent.  
4 Therefore, we reviewed available publications and conducted a meta-analysis to  
5 explore the prognostic value of the pretreatment NLR for overall survival (OS) and  
6 progression-free survival (PFS) in clinical trials on lung cancer patients receiving  
7 immunotherapy.

## 8 **Materials and Methods**

### 9 **Patient and Public Involvement: No patient was involved**

#### 10 **Search strategy**

11 The PRISMA guidelines for a systematic review and meta-analysis were strictly  
12 followed in this article (registration number PROSPERO: CRD42018104856). An  
13 online search was conducted to identify relevant publications in the PubMed,  
14 Cochrane Library, Web of Science and Embase databases. The following words were  
15 used to search for studies on the associations between the pretreatment NLR and  
16 survival time in patients with lung cancer published before July 2019: “pulmonary  
17 neoplasms”, “neutrophil lymphocyte ratio”, “immunotherapy”, “programmed death  
18 receptor-1”, and “immune checkpoint inhibitor”. A full electronic search strategy is

1 provided in the supplementary information (Supplementary Table 1). Additional  
2 studies were selected for a full-text review were selected by exploring the references  
3 cited in the selected articles and relevant reviews. The articles were limited to the  
4 English language, but there were no restrictions on the minimum number of patients.  
5 Two authors (J Jin and L Yang) independently reviewed the titles and abstracts of the  
6 retrieved articles to select the potentially relevant articles for a careful assessment.

### 7 **Eligibility criteria**

8 The inclusion criteria were as follows: 1) retrospective or prospective studies  
9 published before July 2019; 2) all patients enrolled in the studies were diagnosed with  
10 lung cancer by biopsy and received immunotherapy; 3) the value of the NLR was  
11 calculated based on the level of neutrophils and lymphocytes; and 4) HRs and 95%  
12 CIs were provided and data necessary to calculate them were reported.

13 The exclusion criteria were as follows: 1) review, meeting abstract, letter, or full text  
14 unavailable in English; 2) nonhuman studies; and 3) research that did not provide the  
15 value of the NLR.

### 16 **Data extraction**

17 From each study, the name of the study, first author, year of publication, study design,  
18 number of patients, sex distribution, age, median follow-up time, histology, NLR

1 cutoff value, NLR at baseline, line of therapy, drugs and HRs with 95% CIs for OS  
2 and PFS were extracted by two authors (D Liu and L Yang). If univariate and  
3 multivariate analysis results were simultaneously reported, only the multivariate  
4 analysis results were extracted. Any disagreements between the authors were resolved  
5 by a discussion and consensus. The most recent study was chosen when duplicate  
6 studies occurred.

### 7 **Quality assessment**

8 The primary studies were assessed by the Newcastle-Ottawa quality assessment Scale  
9 (NOS). The quality assessment was conducted by two independent researchers (J Jin  
10 and D Liu). The studies in which the mark was between 6 and 9 points were regarded  
11 as high-quality studies.

12 ([http://www.ohri.ca/programs/clinical\\_epidemiology/oxford.asp](http://www.ohri.ca/programs/clinical_epidemiology/oxford.asp))

### 13 **Statistical analysis**

14 The primary endpoints were the OS and PFS of lung cancer patients receiving  
15 immunotherapy. PFS was defined as the time from the initial date of immunotherapy  
16 to the date of progression or death. OS was calculated from the date of inclusion to  
17 the time of death from any cause. HRs with 95% CIs were directly obtained from the  
18 articles or estimated from the Kaplan-Meier curves according to the methods reported

1  
2  
3  
4 1 by Tierney et al.(12) We calculated the pooled HRs of OS and PFS using random  
5  
6 2 effects or fixed effects model. We performed the Q-test to assess between-study  
7  
8  
9 3 heterogeneity and calculated the  $I^2$  statistic, which expresses the percentage of the  
10  
11 4 total observed variability due to study heterogeneity. The heterogeneity between  
12  
13  
14 5 studies was considered small if the  $I^2$  statistic was less than 50% and the P value for  
15  
16  
17 6 the Q-test was less than 0.05. We performed a subgroup analysis to detect the source  
18  
19  
20 7 of heterogeneity. In addition, we considered only subgroups that included more than  
21  
22 8 two studies. Publication bias was assessed by Egger's and Begg's test, and  
23  
24  
25 9 significant publication bias was defined as a  $P < 0.10$ .(13) The trim and fill method was  
26  
27  
28 10 applied when significant publication bias was found to confirm the pooled results.  
29  
30 11 Sensitivity analyses were carried out by excluding each study individually from the  
31  
32  
33 12 meta-analysis.(14) All statistical analyses were performed with R (Version: 3.5.2).

## 34 35 13 **Result**

### 36 37 38 14 **The characteristics of the included studies**

39  
40 15 A total of 1102 studies were retrieved in this meta-analysis, and 279 studies were  
41  
42  
43 16 selected for full-text review. In total, 23 studies with 2068 patients fulfilled the  
44  
45  
46 17 inclusion and exclusion criteria, with publication dates ranging from 2017 to  
47  
48  
49 18 2018.(15-37) The flow diagram of this study is shown in Figure 1. The sample size  
50  
51  
52  
53  
54  
55  
56  
57  
58  
59  
60

1 was between 19 and 201. Of these studies, 9 were conducted in Europe, (16, 17, 21,  
2 24, 27, 30, 35, 36) 5 were conducted in America, (22, 28, 31, 33, 37) and the  
3 remaining studies were conducted in Asia. Among all patients included, 1305 (64.0%)  
4 were males, and 643 (31.4%) were diagnosed with squamous cell carcinoma. Twenty  
5 studies explored the association between the NLR and OS; fifteen studies investigated  
6 the relationship between the NLR and PFS. Additionally, 7 of 23 studies provided  
7 data on the posttreatment NLR. (21, 23, 25, 28, 29, 32, 33) If the study provided data  
8 about posttreatment NLR and OS, we treated it as an independent study in the  
9 subsequent analysis. Six trials performed first-line therapy, (16, 19, 25, 28, 31, 36)  
10 and the other trails performed second or additional-lines of therapy. Most patients  
11 received nivolumab, a PD-1 inhibitor, as immunotherapy. The cutoff value of the  
12 NLR was not the same in all studies; a value of 5 was used frequently, and the median  
13 cutoff value for all enrolled publications was also 5. The NOS scores of the enrolled  
14 studies ranged from 6-9. Detailed information on these studies is presented in Table 1.

#### 15 **Relationship between the NLR and OS in lung cancer patients receiving** 16 **immunotherapy**

17 Twenty studies on a total of 1629 patients treated with immunotherapy provided the  
18 NLR value or data that could be used to calculate the NLR and OS. Five of these

1 studies provided data on the posttreatment NLR and OS. Data from a total of 23  
2 studies were used to combine HRs and 95% CIs. In the pooled analysis of the NLR  
3 and OS, we found that a higher NLR was associated with poorer OS, with high  
4 heterogeneity (HR=1.62; 95% CI: 1.41-1.87; P< 0.001) ( $I^2=81.7\%$ , P< 0.001) (Figure  
5 2). To detect the source of heterogeneity, we conducted a subgroup analysis on certain  
6 clinical factors that may influence the final results, such as study design, the time at  
7 which the NLR was determined, ethnicity, sex ratio, the proportion of patients with  
8 squamous cell carcinoma (SCC%), the NLR at baseline, the treatment line, the  
9 median follow-up time, sample size and the drug given for immunotherapy (Figure 3).  
10 Interestingly, the association between the pretreatment NLR and OS showed a similar  
11 trend to the pooled result (HR=1.87; 95% CI: 1.46-2.39; P < 0.001). However, the  
12 posttreatment NLR was not significantly related to the OS in lung cancer patients  
13 (HR=1.80; 95% CI: 0.81-4.00; P= 0.111). However, these results were still highly  
14 heterogeneous (pretreatment:  $I^2=79.80\%$ , P< 0.001; posttreatment:  $I^2=83.5\%$ , P<  
15 0.001). Furthermore, the NLR was significantly unrelated to the OS in studies in  
16 which the proportion of patients with squamous cell carcinoma or whose baseline  
17 NLR exceeded the cutoff value was greater than 50% (Figure 3). The subgroup  
18 analysis stratified by ethnicity found that patients in Asia had significantly higher HR



1 (HR=2.76; 95% CI: 1.88- 4.06) and less heterogeneity ( $I^2=45.7\%$ ,  $P=0.091$ ) than  
2 those in Europe and America ( $P_{\text{interaction}}=0.030$ ) (Figure 3).

### 3 **Relationship between the NLR and PFS in lung cancer patients receiving** 4 **immunotherapy**

5 Data on the NLR and PFS of 1612 patients treated with immunotherapy in 20 studies  
6 were extracted to obtain the pooled HR and 95% CI. Four of these studies provided  
7 the posttreatment NLR and its relationship with PFS. The random effects model  
8 revealed a significant association between an elevated NLR and PFS in lung cancer  
9 patients receiving immunotherapy (HR=1.47; 95% CI: 1.25-1.72;  $P<0.001$ ) with high  
10 heterogeneity ( $I^2=72.5\%$ ,  $P<0.001$ ) (Figure 4). To detect the potential source of  
11 heterogeneity in studies reporting PFS data, a subgroup analysis stratified by the  
12 factors that affect the NLR was performed as previously described (Figure 5). Similar  
13 to the relationship between the NLR and OS, the NLR was significantly unrelated to  
14 the PFS in studies in which the proportion of patients with squamous cell carcinoma  
15 was greater than 50% ( $P_{\text{interaction}}=0.005$ ). However, the pooled results for subgroups  
16 based on other factors were not markedly changed with a low level of heterogeneity.

### 17 **Sensitivity analysis and Publication bias**

18 We found high heterogeneity among studies in which the relationship between the

1 pretreatment NLR, OS and PFS was analyzed. Therefore, we performed a sensitivity  
2 analysis on all enrolled studies. The effect of each study set on the combined HRs was  
3 evaluated by excluding each study individually from the meta-analysis. The results of  
4 the sensitivity analysis showed that the pooled HRs for OS and PFS were robust in  
5 our meta-analysis (Figure 6A and 6B). We also conducted a subgroup analysis  
6 stratified by various factors to detect the source of heterogeneity. Begg's test  
7 presented no evidence of obvious publication bias in studies reporting the association  
8 between the NLR and OS ( $P=0.673$ ) or in those reporting the association between the  
9 NLR and PFS ( $P=0.074$ ), but Egger's test showed significant publication bias in  
10 which both were reported ( $P<0.001$  for both). Therefore, we performed a trim and fill  
11 analysis on studies reporting the relationship between the NLR and OS/PFS.  
12 However, the result was unchanged after eliminating the influence of publication bias  
13 (OS: HR=1.40; 95% CI:1.22-1.60;  $P<0.001$ , PFS: HR=1.33; 95% CI:1.14-1.56;  $P<$   
14  $0.001$ , Supplementary Figure 1).

#### 15 **Discussion:**

16 The results of our meta-analysis revealed the prognostic effect of both the  
17 pretreatment and posttreatment NLR on OS and PFS in lung cancer patients receiving  
18 immunotherapy. Twenty-three studies involving a total of 2049 lung cancer patients

1 showed that an increased NLR was significantly associated with poor OS (HR=1.62;  
2 95% CI: 1.41-1.87; P< 0.001) and PFS (HR=1.47; 95% CI: 1.25-1.72; P< 0.001).

3 Interestingly, the posttreatment NLR was not significantly associated with OS, and  
4 patients in Asia had significantly higher HRs than those in Europe and America.

5 The immune checkpoint is a kind of mechanism that plays a protective role in the  
6 human immune system and acts as a brake to prevent inflammatory damage caused by  
7 the excessive activation of T cells.(38) Human anti-PD-1 IgG4 mAb is now widely  
8 used and shows higher efficacy than standard therapies in lung cancer therapies. (39)

9 Despite a wide consensus on testing tumor tissues for PD-L1 expression, the human  
10 anti-PD-1 IgG4 mAb is limited by its “unperfected dichotomy” across studies and  
11 molecules; patients with low levels of PD-L1 expression have response rates of up to  
12 17%, and roughly half of patients are “not-responders” despite having high tumor  
13 levels of PD-L1. Several factors could affect the response and survival of patients  
14 receiving immunotherapy.(39) In addition to tumor mutation loads and the expression  
15 of tumor antigens, the status of systemic inflammation also plays an important role in  
16 lung cancer patients receiving immunotherapy. Tumor-associated cytokines and the  
17 relevant signaling pathways could be reflected by the level of systemic inflammation,  
18 which has been proven to be associated with poor survival in patients with solid

1  
2  
3  
4 1 tumors.(8) Biomarkers such as NLR, PLR, GPS and modified GPS(mGPS) have been  
5  
6 2 used as prognostic factors in lung cancer.(9-11) In addition, the role of systemic  
7  
8  
9 3 inflammation in patients receiving immunotherapy is particularly important for their  
10  
11 4 survival. Several studies have explored the effect of the pretreatment NLR on lung  
12  
13  
14 5 cancer patients receiving immunotherapy.(31, 40-45) There are also two meta-  
15  
16  
17 6 analyses concerning the pretreatment NLR and survival in patients with advanced  
18  
19  
20 7 cancer. (46) (47) In summary, the NLR is a reliable prognostic factor for patients with  
21  
22 8 various cancer types.  
23  
24  
25 9 Sacdalan D. B reported that a high NLR resulted in poor PFS in patients with several  
26  
27 10 kinds of cancers, such as melanoma, non-small-cell lung cancer (NSCLC) and  
28  
29  
30 11 genitourinary cancer,(46) which was consistent with our results. However, only three  
31  
32  
33 12 publications on lung cancer were enrolled in the previous meta-analysis, and a  
34  
35  
36 13 nonsignificant association was discovered between the pretreatment NLR and OS was  
37  
38  
39 14 discovered. In addition, two of the three studies included in the meta-analysis  
40  
41  
42 15 previously mentioned only provided only abstracts, and we cloud not obtain more  
43  
44  
45 16 details about those cohorts or study designs. Another meta-analysis conducted by Jiang  
46  
47  
48 17 T also revealed a trend similar to ours, but the results of the subgroup analysis showed  
49  
50  
51 18 that posttreatment NLR was significantly associated with poor OS and PFS, which is  
52  
53  
54  
55  
56  
57  
58  
59  
60

1 inconsistent with our result. We enrolled more research articles in our study. In addition,  
2 we performed subgroup analyses stratified by additional clinical factors. Furthermore,  
3 our results showed that the ethnicity, the NLR at baseline and the proportion of patients  
4 with squamous cell carcinoma may affect the prognostic value of the NLR. However,  
5 due to the high heterogeneity, the results must be interpreted with caution. We found  
6 that patients in Asia had a significant higher HR than those in Europe and America in  
7 the subgroup analysis of the relationship between the NLR and OS. Some studies  
8 showed that neutrophils were the most abundant immune cell type identified in NSCLC  
9 patients and accounted for nearly 20% of all CD45+ cells in patients from America.(48)  
10 However, this result was not found in patients from Asia or Europe. The systemic  
11 inflammatory response in different ethnicities might differ. Furthermore, we collected  
12 baseline patient information, including the proportion of patients with squamous cell  
13 carcinoma, from all studies, and our results showed that the histology of lung cancer  
14 might have an impact on the prognostic value of the NLR. Many factors including  
15 tumor mutation load and the expression of tumor antigens, affect patient response and  
16 survival. (39) Patients with lung adenocarcinoma have a high EGFR mutation rate and  
17 some studies revealed that patients with targetable oncogenes were associated with a  
18 poor response to immunotherapy. (49) This may account for the results of our article.

1  
2  
3  
4 1 The current study had several limitations. First, high heterogeneity was present in this  
5  
6 2 analysis although we conducted sensitivity analyses on all studies. The results were  
7  
8  
9 3 robust after eliminating each study from the analysis. In addition, we performed  
10  
11 4 subgroup analyses on certain possible impact factors to detect the source of  
12  
13  
14 5 heterogeneity. Second, Egger's test showed that obvious publication bias in the  
15  
16  
17 6 current study. The pooled results should be treated with caution, although trim and fill  
18  
19  
20 7 analysis testing indicated credibility for this study. Additionally, considering the high  
21  
22 8 heterogeneity after subgroup analysis, other factors might be responsible for the high  
23  
24  
25 9 heterogeneity in this meta-analysis.

#### 10 **Conclusion:**

11 Generally, our meta-analysis focused on the clinical prognostic agreement of the NLR  
12 and OS and PFS in lung cancer patients. Importantly, given the limitations mentioned  
13 above, these findings should be treated with caution in clinical practice. More  
14 prospective cohort studies are needed to confirm our results.

#### 15 **Contributorship statement:**

16 (I) Conception and design: W Li, J Jin and Lan Y; (II) Administrative support: J Jin, W  
17 Li; (III) Provision of study materials or patients: D Liu; (IV) Collection and assembly  
18 of data: J Jin, D Liu; (V) Data analysis and interpretation: D Liu, Lan Y; (VI)

1 Manuscript writing: All authors; (VII) Final approval of manuscript: All authors.

## 2 **Competing interests**

3 The authors have no conflicts of interest to declare

## 4 **Funding**

5 None

## 6 **Data sharing statement:**

7 All data in the current study are available in the published articles

## 8 **Acknowledgments:**

9 This work was supported by the Transformation Projects of Sci-Tech Achievements  
10 of Sichuan Province (2016CZYD0001), the Sci-Tech Support Program of Science and  
11 Technology Department of Sichuan Province (2016SZ0073), the National Major Sci-  
12 Tech Project (2017ZX10103004-012) and the National Key Development Plan for  
13 Precision Medicine Research (2017YFC0910004).

## 14 **Compliance with Ethical Standards**

15 **Ethical approval:** All procedures performed in the studies involving human  
16 participants were in accordance with the ethical standards of the institutional and/or  
17 national research committee and with the 1964 Helsinki Declaration and its later  
18 amendment.

**Reference:**

1. Siegel RL, Miller KD, Jemal A. Cancer statistics, 2015. *CA Cancer J Clin.* 2015;65(1):5-29.
2. Callahan MK, Postow MA, Wolchok JD. Targeting T Cell Co-receptors for Cancer Therapy. *Immunity.* 2016;44(5):1069-78.
3. Chen YM. Immune checkpoint inhibitors for nonsmall cell lung cancer treatment. *Journal of the Chinese Medical Association Jcma.* 2016;80(1):7.
4. Yarchoan M, Hopkins A, Jaffee EM. Tumor Mutational Burden and Response Rate to PD-1 Inhibition. *The New England journal of medicine.* 2017;377(25):2500-1.
5. Anagnostou V, Smith KN, Forde PM, Niknafs N, Bhattacharya R, White J, et al. Evolution of Neoantigen Landscape during Immune Checkpoint Blockade in Non-Small Cell Lung Cancer. *Cancer discovery.* 2017;7(3):264-76.
6. Goswami S, Basu S, Sharma P. A potential biomarker for anti-PD-1 immunotherapy. *Nature medicine.* 2018;24(2):123-4.
7. Marchetti A, Barberis M, Franco R, De Luca G, Pace MV, Staibano S, et al. Multicenter Comparison of 22C3 PharmDx (Agilent) and SP263 (Ventana) Assays to Test PD-L1 Expression for NSCLC Patients to Be Treated with Immune Checkpoint Inhibitors. *Journal of thoracic oncology : official publication of the International Association for the Study of Lung Cancer.* 2017;12(11):1654-63.
8. Hooper CE, Lyburn ID, Searle J, Darby M, Hall T, Hall D, et al. The South West Area Mesothelioma and Pemetrexed trial: a multicentre prospective observational study evaluating novel markers of chemotherapy response and prognostication. *British journal of cancer.* 2015;112(7):1175-82.
9. Wang X, Teng F, Kong L, Yu J. Pretreatment neutrophil-to-lymphocyte ratio as a survival predictor for small-cell lung cancer. *OncoTargets and therapy.* 2016;9:5761-70.
10. Sanchez-Salcedo P, de-Torres JP, Martinez-Urbistondo D, Gonzalez-Gutierrez J, Berto J, Campo A, et al. The neutrophil to lymphocyte and platelet to lymphocyte ratios as biomarkers for lung cancer development. *Lung cancer (Amsterdam, Netherlands).* 2016;97:28-34.
11. Kos M, Hoczade C, Kos FT, Uncu D, Karakas E, Dogan M, et al. Prognostic role of pretreatment platelet/lymphocyte ratio in patients with non-small cell lung cancer. *Wien Klin Wochenschr.* 2016;128(17-18):635-40.
12. Tierney JF, Stewart LA, Ghersi D, Burdett S, Sydes MR. Practical methods for incorporating summary time-to-event data into meta-analysis. *Trials.* 2007;8(1):16.
13. Begg CB, Mazumdar M. Operating characteristics of a rank correlation test for publication bias. *Biometrics.* 1994;50(4):1088.
14. O'Rourke K, Shea B, Wells GA. *Meta-Analysis of Clinical Trials: Springer New York; 2001.* 397-424 p.
15. Ren F, Zhao T, Liu B, Pan L. Neutrophil-lymphocyte ratio (NLR) predicted prognosis for advanced



- 1 non-small-cell lung cancer (NSCLC) patients who received immune checkpoint blockade (ICB).  
2 OncoTargets and therapy. 2019;12:4235-44.
- 3 16. Pavan A, Calvetti L, Dal Maso A, Attili I, Del Bianco P, Pasello G, et al. Peripheral Blood Markers  
4 Identify Risk of Immune-Related Toxicity in Advanced Non-Small Cell Lung Cancer Treated with  
5 Immune-Checkpoint Inhibitors. *The oncologist*. 2019.
- 6 17. Passiglia F, Galvano A, Castiglia M, Incorvaia L, Calo V, Listi A, et al. Monitoring blood biomarkers  
7 to predict nivolumab effectiveness in NSCLC patients. *Therapeutic advances in medical oncology*.  
8 2019;11:1758835919839928.
- 9 18. Minami S, Ihara S, Ikuta S, Komuta K. Gustave Roussy Immune Score and Royal Marsden Hospital  
10 Prognostic Score Are Biomarkers of Immune-Checkpoint Inhibitor for Non-Small Cell Lung Cancer.  
11 *World journal of oncology*. 2019;10(2):90-100.
- 12 19. Ichiki Y, Taira A, Chikaishi Y, Matsumiya H, Mori M, Kanayama M, et al. Prognostic factors of  
13 advanced or postoperative recurrent non-small cell lung cancer targeted with immune check point  
14 inhibitors. *Journal of thoracic disease*. 2019;11(4):1117-23.
- 15 20. Fukui T, Okuma Y, Nakahara Y, Otani S, Igawa S, Katagiri M, et al. Activity of Nivolumab and Utility  
16 of Neutrophil-to-Lymphocyte Ratio as a Predictive Biomarker for Advanced Non-Small-Cell Lung Cancer:  
17 A Prospective Observational Study. *Clinical lung cancer*. 2019;20(3):208-14.e2.
- 18 21. Dusselier M, Deluche E, Delacourt N, Ballouhey J, Egenod T, Melloni B, et al. Neutrophil-to-  
19 lymphocyte ratio evolution is an independent predictor of early progression of second-line nivolumab-  
20 treated patients with advanced non-small-cell lung cancers. *PloS one*. 2019;14(7):e0219060.
- 21 22. Zer A, Sung MR, Walia P, Khoja L, Maganti M, Labbe C, et al. Correlation of Neutrophil to  
22 Lymphocyte Ratio and Absolute Neutrophil Count With Outcomes With PD-1 Axis Inhibitors in Patients  
23 With Advanced Non-Small-Cell Lung Cancer. *Clinical lung cancer*. 2018;19(5):426-+.
- 24 23. Takeda T, Takeuchi M, Saitoh M, Takeda S. Neutrophil-to-lymphocyte ratio after four weeks of  
25 nivolumab administration as a predictive marker in patients with pretreated non-small-cell lung cancer.  
26 *Thoracic cancer*. 2018;9(10):1291-9.
- 27 24. Svaton M, Zemanova M, Skrickova J, Jakubikova L, Kolek V, Kultan J, et al. Chronic Inflammation  
28 as a Potential Predictive Factor of Nivolumab Therapy in Non-small Cell Lung Cancer. *Anticancer  
29 research*. 2018;38(12):6771-82.
- 30 25. Suh KJ, Kim SH, Kim YJ, Kim M, Keam B, Kim TM, et al. Post-treatment neutrophil-to-lymphocyte  
31 ratio at week 6 is prognostic in patients with advanced non-small cell lung cancers treated with anti-  
32 PD-1 antibody. *Cancer Immunology Immunotherapy*. 2018;67(3):459-70.
- 33 26. Shiroyama T, Suzuki H, Tamiya M, Tamiya A, Tanaka A, Okamoto N, et al. Pretreatment advanced  
34 lung cancer inflammation index (ALI) for predicting early progression in nivolumab-treated patients  
35 with advanced non-small cell lung cancer. *Cancer medicine*. 2018;7(1):13-20.
- 36 27. Russo A, Franchina T, Ricciardi GRR, Battaglia A, Scimone A, Berenato R, et al. Baseline neutrophilia,

- 1  
2  
3  
4  
5  
6  
7  
8  
9  
10  
11  
12  
13  
14  
15  
16  
17  
18  
19  
20  
21  
22  
23  
24  
25  
26  
27  
28  
29  
30  
31  
32  
33  
34  
35  
36  
37  
38  
39  
40  
41  
42  
43  
44  
45  
46  
47  
48  
49  
50  
51  
52  
53  
54  
55  
56  
57  
58  
59  
60
- 1 derived neutrophil-to-lymphocyte ratio (dNLR), platelet-to-lymphocyte ratio (PLR), and outcome in non  
2 small cell lung cancer (NSCLC) treated with Nivolumab or Docetaxel. *Journal of cellular physiology*.  
3 2018;233(10):6337-43.
- 4 28. Park W, Kwon D, Saravia D, Desai A, Vargas F, El Dinali M, et al. Developing a Predictive Model for  
5 Clinical Outcomes of Advanced Non-Small Cell Lung Cancer Patients Treated With Nivolumab. *Clinical*  
6 *lung cancer*. 2018;19(3):280-8.e4.
- 7 29. Nakaya A, Kurata T, Yoshioka H, Takeyasu Y, Niki M, Kibata K, et al. Neutrophil-to-lymphocyte ratio  
8 as an early marker of outcomes in patients with advanced non-small-cell lung cancer treated with  
9 nivolumab. *International journal of clinical oncology*. 2018;23(4):634-40.
- 10 30. Mezquita L, Auclin E, Ferrara R, Charrier M, Remon J, Planchard D, et al. Association of the Lung  
11 Immune Prognostic Index With Immune Checkpoint Inhibitor Outcomes in Patients With Advanced  
12 Non-Small Cell Lung Cancer. *JAMA oncology*. 2018;4(3):351-7.
- 13 31. Maymani H, Hess K, Groisberg R, Hong DS, Naing A, Piha-Paul S, et al. Predicting outcomes in  
14 patients with advanced non-small cell lung cancer enrolled in early phase immunotherapy trials. *Lung*  
15 *cancer (Amsterdam, Netherlands)*. 2018;120:137-41.
- 16 32. Kiri T, Yamamoto M, Nagano T, Hazama D, Sekiya R, Katsurada M, et al. The time-series behavior  
17 of neutrophil-to-lymphocyte ratio is useful as a predictive marker in non-small cell lung cancer. *PLoS*  
18 *one*. 2018;13(2):e0193018.
- 19 33. Khunger M, Patil PD, Khunger A, Li M, Hu B, Rakshit S, et al. Post-treatment changes in  
20 hematological parameters predict response to nivolumab monotherapy in non-small cell lung cancer  
21 patients. *PLoS one*. 2018;13(10):e0197743.
- 22 34. Inomata M, Hirai T, Seto Z, Tokui K, Taka C, Okazawa S, et al. Clinical Parameters for Predicting the  
23 Survival in Patients with Squamous and Non-squamous-cell NSCLC Receiving PD-1 Inhibitor Therapy.  
24 *Pathology oncology research : POR*. 2018.
- 25 35. Facchinetti F, Veneziani M, Buti S, Gelsomino F, Squadrilli A, Bordi P, et al. Clinical and hematologic  
26 parameters address the outcomes of non-small-cell lung cancer patients treated with nivolumab.  
27 *Immunotherapy*. 2018;10(8):681-94.
- 28 36. Diem S, Schmid S, Krapf M, Flatz L, Born D, Jochum W, et al. Neutrophil-to-Lymphocyte ratio (NLR)  
29 and Platelet-to-Lymphocyte ratio (PLR) as prognostic markers in patients with non-small cell lung cancer  
30 (NSCLC) treated with nivolumab. *Lung cancer (Amsterdam, Netherlands)*. 2017;111:176-81.
- 31 37. Bagley SJ, Kothari S, Aggarwal C, Bauml JM, Alley EW, Evans TL, et al. Pretreatment neutrophil-to-  
32 lymphocyte ratio as a marker of outcomes in nivolumab-treated patients with advanced non-small-cell  
33 lung cancer. *Lung cancer (Amsterdam, Netherlands)*. 2017;106:1-7.
- 34 38. Ito A, Kondo S, Tada K, Kitano S. Clinical Development of Immune Checkpoint Inhibitors. *Biomed*  
35 *Res Int*. 2015;2015:605478.
- 36 39. Carbone DP, Reck M, Paz-Ares L, Creelan B, Horn L, Steins M, et al. First-Line Nivolumab in Stage

- 1  
2  
3  
4  
5  
6  
7  
8  
9  
10  
11  
12  
13  
14  
15  
16  
17  
18  
19  
20  
21  
22  
23  
24  
25  
26  
27  
28  
29  
30  
31  
32  
33  
34  
35  
36  
37  
38  
39  
40  
41  
42  
43  
44  
45  
46  
47  
48  
49  
50  
51  
52  
53  
54  
55  
56  
57  
58  
59  
60
- 1 IV or Recurrent Non-Small-Cell Lung Cancer. *The New England journal of medicine*. 2017;376(25):2415-26.
- 2  
3 40. Mezquita L, Auclin E, Ferrara R, Charrier M, Remon J, Planchard D, et al. Association of the Lung Immune Prognostic Index With Immune Checkpoint Inhibitor Outcomes in Patients With Advanced Non-Small Cell Lung Cancer. *JAMA Oncol*. 2018;4(3):351-7.
- 4  
5 41. Nakaya A, Kurata T, Yoshioka H, Takeyasu Y, Niki M, Kibata K, et al. Neutrophil-to-lymphocyte ratio as an early marker of outcomes in patients with advanced non-small-cell lung cancer treated with nivolumab. *Int J Clin Oncol*. 2018.
- 6  
7 42. Zer A, Sung MR, Walia P, Khoja L, Maganti M, Labbe C, et al. Correlation of Neutrophil to Lymphocyte Ratio and Absolute Neutrophil Count With Outcomes With PD-1 Axis Inhibitors in Patients With Advanced Non-Small-Cell Lung Cancer. *Clin Lung Cancer*. 2018.
- 8  
9 43. Park W, Kwon D, Saravia D, Desai A, Vargas F, El Dinali M, et al. Developing a Predictive Model for Clinical Outcomes of Advanced Non-Small Cell Lung Cancer Patients Treated With Nivolumab. *Clinical Lung Cancer*. 2018;19(3):280-8.e4.
- 10  
11 44. Fukui T, Okuma Y, Nakahara Y, Otani S, Igawa S, Katagiri M, et al. Activity of Nivolumab and Utility of Neutrophil-to-Lymphocyte Ratio as a Predictive Biomarker for Advanced Non-Small-Cell Lung Cancer: A Prospective Observational Study. *Clinical Lung Cancer*. 2018.
- 12  
13 45. Russo A, Franchina T, Ricciardi GRR, Battaglia A, Scimone A, Berenato R, et al. Baseline neutrophilia, derived neutrophil-to-lymphocyte ratio (dNLR), platelet-to-lymphocyte ratio (PLR), and outcome in non small cell lung cancer (NSCLC) treated with Nivolumab or Docetaxel. *J Cell Physiol*. 2018.
- 14  
15 46. Sacdalan DB, Lucero JA, Sacdalan DL. Prognostic utility of baseline neutrophil-to-lymphocyte ratio in patients receiving immune checkpoint inhibitors: a review and meta-analysis. *OncoTargets and therapy*. 2018;11:955-65.
- 16  
17 47. Jiang T, Bai Y, Zhou F, Li W, Gao G, Su C, et al. Clinical value of neutrophil-to-lymphocyte ratio in patients with non-small-cell lung cancer treated with PD-1/PD-L1 inhibitors. *Lung cancer (Amsterdam, Netherlands)*. 2019;130:76-83.
- 18  
19 48. Kargl J, Busch SE, Yang GH, Kim KH, Hanke ML, Metz HE, et al. Neutrophils dominate the immune cell composition in non-small cell lung cancer. *Nature communications*. 2017;8:14381.
- 20  
21 49. Mazieres J, Drilon A, Lusque A, Mhanna L, Cortot AB, Mezquita L, et al. Immune checkpoint inhibitors for patients with advanced lung cancer and oncogenic driver alterations: results from the IMMUNOTARGET registry. *Ann Oncol*. 2019;30(8):1321-8.

## 33 **Figure Legends**

34 Figure 1 Flow chart of study selection

1  
2  
3  
4 1 Figure 2 Forest plot of the association between the NLR and OS in patients with lung  
5  
6 2 cancer receiving immunotherapy  
7

8  
9 3 Figure 3 Subgroup analysis of the relationship between the NLR and OS in patients  
10  
11 4 with lung cancer receiving immunotherapy  
12

13  
14 5 Abbreviations: ICI: immune checkpoint inhibitor; M/F: male/female; SCC%:  
15  
16 6 proportion of patients with squamous cell carcinoma;※: the data here show the  
17  
18 7 proportion of patients whose baseline NLR exceeded the cutoff value; N: nivolumab;  
19  
20 8 P: pembrolizumab; D: durvalumab; E: embrolizumab; A: atezolizumab  
21  
22  
23

24  
25 9 Figure 4 Forest plot of the association between the NLR and PFS in patients with lung  
26  
27 10 cancer receiving immunotherapy  
28

29  
30 11 Figure 5 Subgroup analysis of the relationship between the NLR and PFS in patients  
31  
32 12 with lung cancer receiving immunotherapy  
33

34  
35 13 Abbreviations: ICI: immune checkpoint inhibitor; M/F: male/female; SCC%:  
36  
37 14 proportion of patients with squamous cell carcinoma;※: 20 studies provided the data  
38  
39 15 on the pretreatment NLR and PFS, and 5 of them also provided the posttreatment  
40  
41 16 NLR and PFS; N: nivolumab; P: pembrolizumab; D: durvalumab; E: embrolizumab;  
42  
43 17 A: atezolizumab  
44  
45  
46

47  
48 18 Figure 6 Sensitivity analysis of OS (A) and PFS (B)  
49  
50  
51  
52  
53  
54  
55  
56  
57  
58  
59  
60

1  
2  
3  
4 **1 Table**5  
6 **2 Table 1 The basic characteristics of the enrolled studies**

| 7 Study                | 8 Year    | 9 Country                        | 10 Ethnicity     | 11 Sample size   | 12 MFP   | 13 M/F     | 14 NLR at baseline     |
|------------------------|-----------|----------------------------------|------------------|------------------|----------|------------|------------------------|
| 15 Diem S              | 16 2017   | 17 Europe                        | 18 European      | 19 52            | 20 NM    | 21 29/23   | 22 5.0(2.7-8.3) *      |
| 23 Bagley SJ           | 24 2017   | 25 America                       | 26 American      | 27 175           | 28 NM    | 29 80/95   | 30 NLR $\geq$ 5:58.0%  |
| 31 Russo A             | 32 2018   | 33 Italy                         | 34 European      | 35 28            | 36 17    | 37 25/3    | 38 NM                  |
| 39 Zer A               | 40 2018   | 41 America                       | 42 American      | 43 88            | 44 5.3   | 45 43/45   | 46 NLR $>$ 4:56.8%     |
| 47 Nakaya A            | 48 2018   | 49 Japan                         | 50 Asian         | 51 101           | 52 8.9   | 53 77/24   | 54 NLR $\geq$ 3:46.5%  |
| 55 Maymani H           | 56 2018   | 57 America                       | 58 American      | 59 74            | 60 12.3  | 61 36/38   | 62 NLR $>$ 6:20.3%     |
| 63 Mezquita L          | 64 2018   | 65 Europe                        | 66 European      | 67 161           | 68 12    | 69 100/61  | 70 NLR $>$ 3:39.0%     |
| 71 Fukui T             | 72 2018   | 73 Japan                         | 74 Asian         | 75 52            | 76 10.9  | 77 37/15   | 78 NLR $\geq$ 5:34.6%  |
| 79 Park W              | 80 2018   | 81 America                       | 82 American      | 83 159           | 84 11.5  | 85 82/77   | 86 4.3(0.5-24.1) *     |
| 87 Takeda T            | 88 2018   | 89 Japan                         | 90 Asian         | 91 30            | 92 NM    | 93 19/11   | 94 NLR $>$ 5:30.0%     |
| 95 Svaton M            | 96 2018   | 97 Czech Republic                | 98 European      | 99 120           | 100 NM   | 101 71/49  | 102 NLR $>$ 3.8:50.0%  |
| 103 Suh Koung Jin      | 104 2018  | 105 Korea                        | 106 Asian        | 107 54           | 108 26.2 | 109 42/12  | 110 NLR $>$ 5:14.8%    |
| 111 Shiroyama Takayuki | 112 2018  | 113 Japan                        | 114 Asian        | 115 201          | 116 12.4 | 117 135/66 | 118 NLR $>$ 4:39.3%    |
| 119 Kiri T             | 120 2018  | 121 Japan                        | 122 Asian        | 123 19.00        | 124 NM   | 125 19     | 126 NLR $>$ 5:31.6%    |
| 127 Khunger M          | 128 2018  | 129 America                      | 130 American     | 131 109          | 132 30   | 133 56/53  | 134 NLR $\geq$ 5:50.5% |
| 135 Inomata M          | 136 2018  | 137 Japan                        | 138 Asian        | 139 36           | 140 NM   | 141 27/9   | 142 NLR $\geq$ 5:44.4% |
| 143 Facchinetti F      | 144 2018  | 145 Italy                        | 146 European     | 147 54           | 148 12.6 | 149 45/9   | 150 NM                 |
| 151 Ren F              | 152 2019  | 153 China                        | 154 Asian        | 155 147          | 156 2.6  | 157 94/53  | 158 NLR $>$ 2.5:59.9%  |
| 159 Pavan A            | 160 2019  | 161 Italy                        | 162 European     | 163 184          | 164 56.3 | 165 125/59 | 166 NLR $\geq$ 3:57.5% |
| 167 Passiglia F        | 168 2019  | 169 Italy                        | 170 European     | 171 45           | 172 9.1  | 173 32/13  | 174 NLR $>$ 3.3:51.1%  |
| 175 Minami S           | 176 2019  | 177 Japan                        | 178 Asian        | 179 76           | 180 NM   | 181 49/27  | 182 NLR $\geq$ 6:14.5% |
| 183 Ichiki Y           | 184 2019  | 185 Japan                        | 186 Asian        | 187 44           | 188 4.83 | 189 38/6   | 190 NM                 |
| 191 Dusselier M        | 192 2019  | 193 France                       | 194 European     | 195 59           | 196 NM   | 197 44/15  | 198 NLR $>$ 5:62.7%    |
| 199 Study              | 200 SCC%  | 201 Treatment lines              | 202 Outcome      | 203 Study design | 204 NOS  | 205 Cutoff | 206 IO                 |
| 207 Diem S             | 208 34.6% | 209 including first line therapy | 210 OS/PFS       | 211 RO           | 212 6    | 213 5      | 214 N                  |
| 215 Bagley SJ          | 216 24.0% | 217 at least second-line therapy | 218 OS/PFS       | 219 RO           | 220 6    | 221 5      | 222 N                  |
| 223 Russo A            | 224 60.7% | 225 at least second-line therapy | 226 OS/PFS       | 227 RO           | 228 7    | 229 3      | 230 N                  |
| 231 Zer A              | 232 17.1% | 233 at least second-line therapy | 234 OS/PFS/DCR   | 235 RO           | 236 7    | 237 4      | 238 NM                 |
| 239 Nakaya A           | 240 36.6% | 241 at least second-line therapy | 242 PFS/irAEs    | 243 RO           | 244 6    | 245 3      | 246 N                  |
| 247 Maymani H          | 248 16.2% | 249 including first line therapy | 250 OS/PFS       | 251 RO           | 252 7    | 253 6      | 254 N/P/D              |
| 255 Mezquita L         | 256 28.6% | 257 at least second line therapy | 258 OS/PFS       | 259 RO           | 260 9    | 261 3      | 262 N/E/A/D            |
| 263 Fukui T            | 264 30.8% | 265 at least second-line therapy | 266 OS/PFS/irAEs | 267 PO           | 268 7    | 269 5      | 270 N                  |

1  
2  
3  
4  
5  
6  
7  
8  
9  
10  
11  
12  
13  
14  
15  
16  
17  
18  
19  
20  
21  
22  
23  
24  
25  
26  
27  
28  
29  
30  
31  
32  
33  
34  
35  
36  
37  
38  
39  
40  
41  
42  
43  
44  
45  
46  
47  
48  
49  
50  
51  
52  
53  
54  
55  
56  
57  
58  
59  
60

|                           |       |                              |               |    |   |     |       |
|---------------------------|-------|------------------------------|---------------|----|---|-----|-------|
| <b>Park W</b>             | 24.5% | including first line therapy | OS/PFS        | RO | 7 | 5   | N     |
| <b>Takeda T</b>           | 30.0% | at least second-line therapy | PFS           | RO | 6 | 5   | N     |
| <b>Svaton M</b>           | 33.3% | at least second-line therapy | OS/PFS        | RO | 7 | 3.8 | N     |
| <b>Suh Koung Jin</b>      | 31.5% | including first line therapy | OS/PFS/irAEs  | RO | 8 | 5   | N/P   |
| <b>Shiroyama Takayuki</b> | 30.4% | at least second-line therapy | PFS/RR        | RO | 7 | 4   | N     |
| <b>Kiri T</b>             | 31.5% | at least second-line therapy | OS/PFS/TTF    | RO | 7 | 5   | N     |
| <b>Khunger M</b>          | 23.9% | at least second-line therapy | OS            | RO | 6 | 5   | N     |
| <b>Inomata M</b>          | 44.4% | at least second-line therapy | PFS           | RO | 6 | 5   | N/P   |
| <b>Facchinetti F</b>      | 48.2% | at least second-line therapy | OS/PFS/TTF/DP | PO | 8 | 4   | N     |
| <b>Ren F</b>              | 42.2% | at least second-line therapy | OS/PFS        | RO | 6 | 2.5 | N/P   |
| <b>Pavan A</b>            | 32.1% | including first line therapy | OS/PFS/irAEs  | RO | 8 | 3   | N/P/A |
| <b>Passiglia F</b>        | 44.4% | at least second-line therapy | OS/TTP        | RO | 8 | 3.3 | N     |
| <b>Minami S</b>           | 23.7% | at least second-line therapy | OS/PFS        | RO | 9 | 6   | N/P/A |
| <b>Ichiki Y</b>           | 65.9% | including first line therapy | OS/PFS/irAEs  | RO | 7 | NM  | N/P   |
| <b>Dusselier M</b>        | 20.3% | at least second-line therapy | OS            | RO | 8 | 5   | N     |

1

2 Abbreviations: NLR: neutrophil to lymphocyte ratio; NM: not mentioned; M/F:

3 male/female; MFP: median follow-up (months); SCC%: proportion of patients with

4 squamous cell carcinoma; IO: immunotherapy; N: nivolumab; P: pembrolizumab; D:

5 durvalumab; E: embrolizumab; A: atezolizumab; OS: overall survival; PFS:

6 progression-free survival; DCR: disease control rate; irAEs: immune-related adverse

7 events; RR: response rate; TTF: time to treatment failure; RO: retrospective study;

8 PO: prospective study; NOS: Newcastle-Ottawa quality assessment Scale; \*: the study

9 provided only the median NLR and range at baseline.

## 10 **Supplementary information**

11 S1: File. PRISMA 2009 checklist.

- 1
- 2
- 3
- 4 1 S2: Search strategy. This file provides the full electronic search strategy for PubMed
- 5
- 6 2 S3: Figure 1. Trim and fill analysis of OS and PFS
- 7
- 8
- 9 3 S4: Professional editing certificaion
- 10
- 11
- 12
- 13
- 14
- 15
- 16
- 17
- 18
- 19
- 20
- 21
- 22
- 23
- 24
- 25
- 26
- 27
- 28
- 29
- 30
- 31
- 32
- 33
- 34
- 35
- 36
- 37
- 38
- 39
- 40
- 41
- 42
- 43
- 44
- 45
- 46
- 47
- 48
- 49
- 50
- 51
- 52
- 53
- 54
- 55
- 56
- 57
- 58
- 59
- 60

For peer review only

1  
2  
3  
4  
5  
6  
7  
8  
9  
10  
11  
12  
13  
14  
15  
16  
17  
18  
19  
20  
21  
22  
23  
24  
25  
26  
27  
28  
29  
30  
31  
32  
33  
34  
35  
36  
37  
38  
39  
40  
41  
42  
43  
44  
45  
46  
47  
48  
49  
50  
51  
52  
53  
54  
55  
56  
57  
58  
59  
60

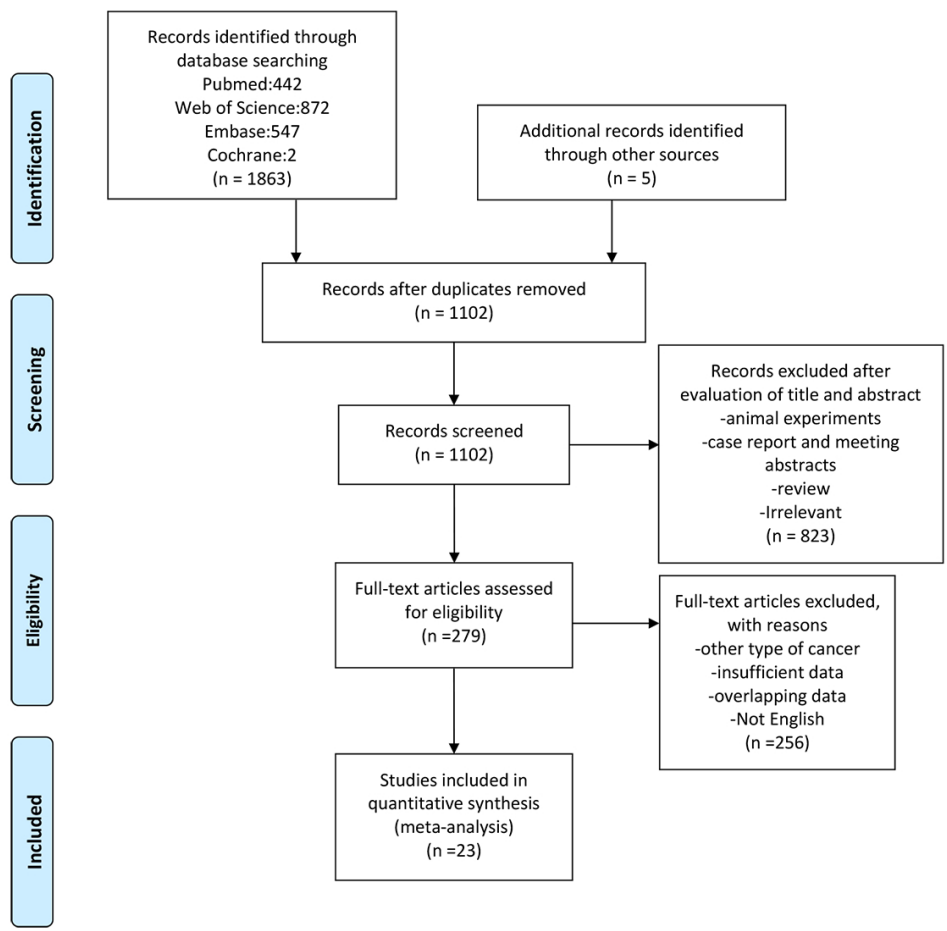

Figure 1 Flow chart of study selection



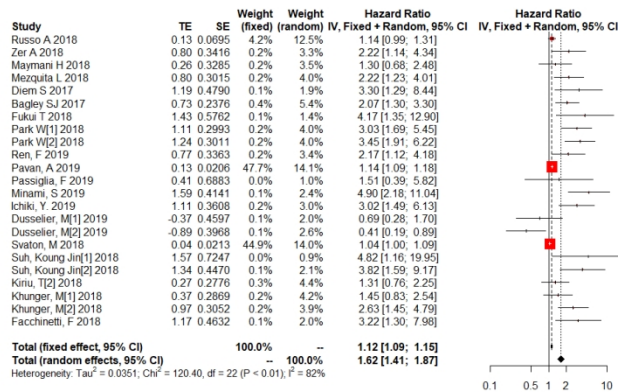

Figure 2 Forest plot of the association between NLR and OS in patients with lung cancer receiving immunotherapy

396x246mm (96 x 96 DPI)

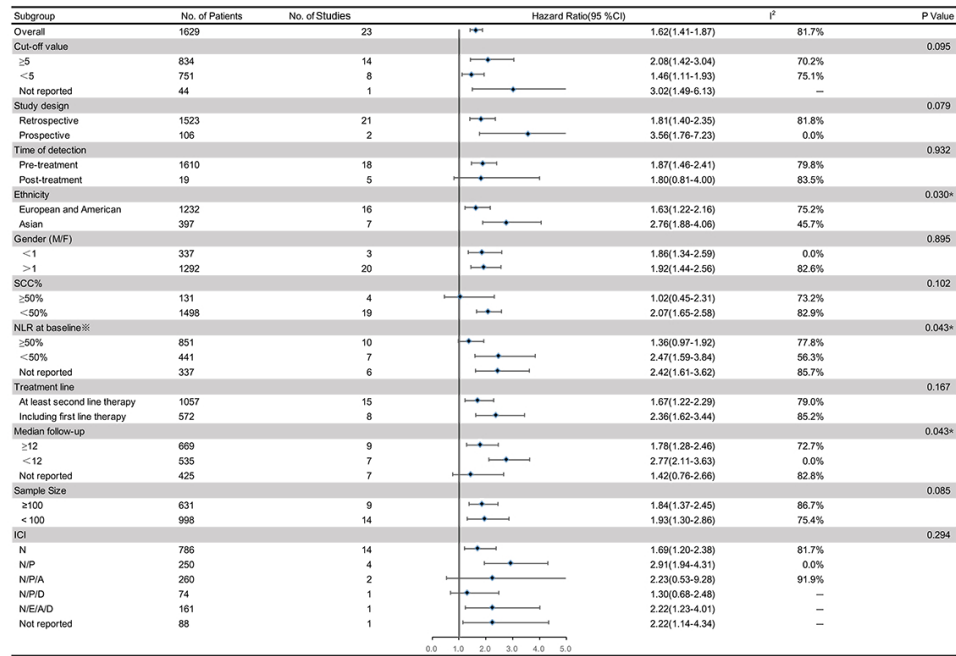

Figure 3 Subgroup analysis of the relationship between the NLR and OS in patients with lung cancer receiving immunotherapy

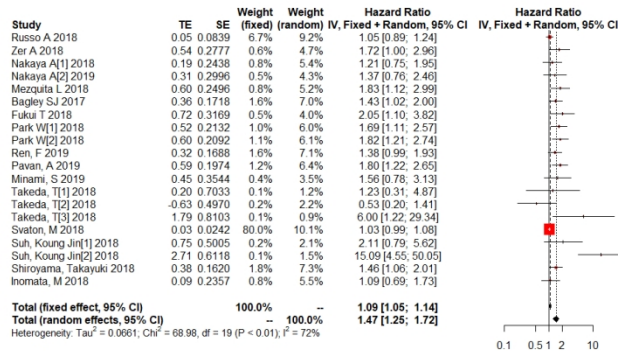

Figure 4 Forest plot of the association between NLR and PFS in patients with lung cancer receiving immunotherapy

396x246mm (96 x 96 DPI)

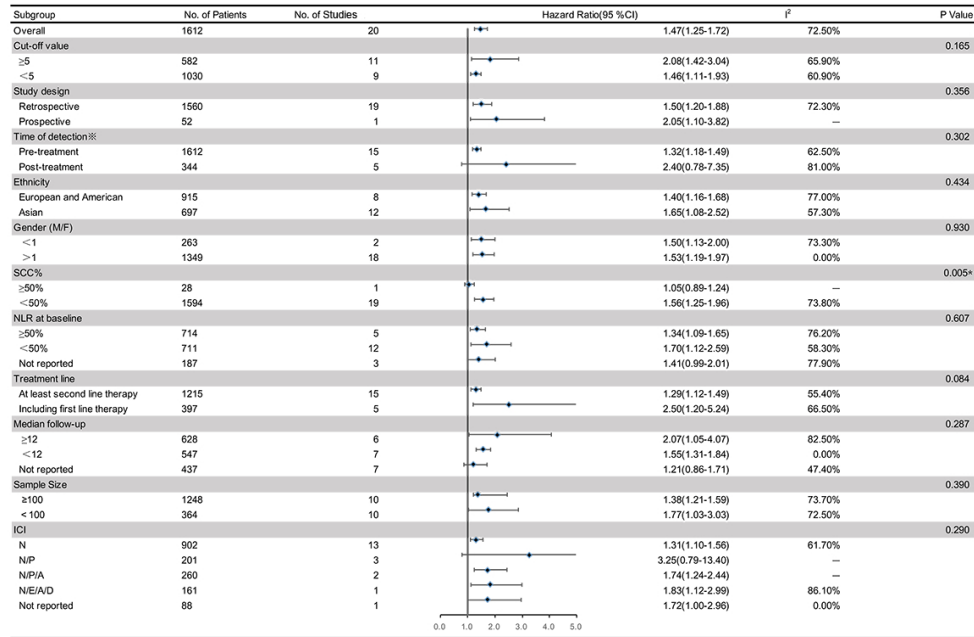

Figure 5 Subgroup analysis of the relationship between the NLR and PFS in patients with lung cancer receiving immunotherapy



Figure 6 Sensitivity analysis on OS (A) and PFS (B)

143x74mm (300 x 300 DPI)

**Supplement Table1 Search strategy for meta-analysis of Correlation of the neutrophil to lymphocyte ratio and clinical outcomes in lung cancer patients receiving immunotherapy: a meta-analysis (PubMed via NLM)**

|   |                                                                                                                                                                                                                                                                                                                                                                                                                                                 |
|---|-------------------------------------------------------------------------------------------------------------------------------------------------------------------------------------------------------------------------------------------------------------------------------------------------------------------------------------------------------------------------------------------------------------------------------------------------|
|   | <b>Search terms: <i>neutrophil to lymphocyte ratio and lung cancer patients with immunotherapy</i></b>                                                                                                                                                                                                                                                                                                                                          |
|   | <b><i>Population: persons with lung cancer receiving immunotherapy</i></b>                                                                                                                                                                                                                                                                                                                                                                      |
| 1 | (((((Cancer of Lung) OR Pulmonary Neoplasms) OR Neoplasms, Lung) OR Lung Neoplasm) OR Neoplasm, Lung) OR Neoplasms, Pulmonary) OR Neoplasm, Pulmonary) OR Pulmonary Neoplasm) OR Lung Cancer) OR Cancer, Lung) OR Cancers, Lung) OR Lung Cancers) OR Pulmonary Cancer) OR Cancer, Pulmonary) OR Cancers, Pulmonary) OR Pulmonary Cancers) OR Cancer of the Lung) OR "Lung Neoplasms"[Mesh]))) AND (("Immunotherapy"[Mesh]) AND Immunotherapies) |
|   | <b><i>Intervention (Expose): neutrophil to lymphocyte ratio</i></b>                                                                                                                                                                                                                                                                                                                                                                             |
| 2 | ((NLR) OR (neutrophil to lymphocyte ratio) OR neutrophil lymphocyte ratio))                                                                                                                                                                                                                                                                                                                                                                     |
|   | <b><i>Combined sets</i></b>                                                                                                                                                                                                                                                                                                                                                                                                                     |
| 3 | 1 and 2                                                                                                                                                                                                                                                                                                                                                                                                                                         |
|   | <b><i>Limits</i></b>                                                                                                                                                                                                                                                                                                                                                                                                                            |
| 4 | 3 AND English [Language]                                                                                                                                                                                                                                                                                                                                                                                                                        |

[Mesh] = Term from the Medline controlled vocabulary, including terms found below this term in the Mesh hierarchy

1  
2  
3  
4  
5  
6  
7  
8  
9  
10  
11  
12  
13  
14  
15  
16  
17  
18  
19  
20  
21  
22  
23  
24  
25  
26  
27  
28  
29  
30  
31  
32  
33  
34  
35  
36  
37  
38  
39  
40  
41  
42  
43  
44  
45  
46  
47  
48  
49  
50  
51  
52  
53  
54  
55  
56  
57  
58  
59  
60

A

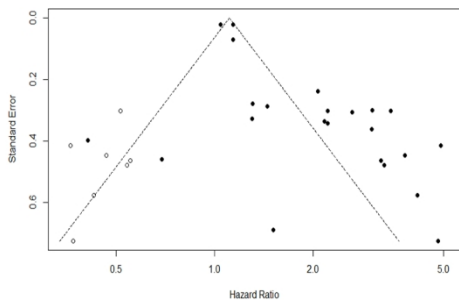

B

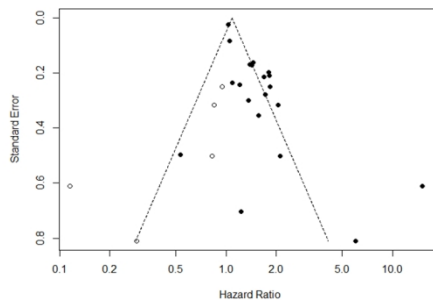

150x60mm (300 x 300 DPI)

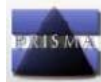

# PRISMA 2009 Checklist

| Section/topic                      | #  | Checklist item                                                                                                                                                                                                                                                                                              | Reported on page #  |
|------------------------------------|----|-------------------------------------------------------------------------------------------------------------------------------------------------------------------------------------------------------------------------------------------------------------------------------------------------------------|---------------------|
| <b>TITLE</b>                       |    |                                                                                                                                                                                                                                                                                                             |                     |
| Title                              | 1  | Identify the report as a systematic review, meta-analysis, or both.                                                                                                                                                                                                                                         | 1                   |
| <b>ABSTRACT</b>                    |    |                                                                                                                                                                                                                                                                                                             |                     |
| Structured summary                 | 2  | Provide a structured summary including, as applicable: background; objectives; data sources; study eligibility criteria, participants, and interventions; study appraisal and synthesis methods; results; limitations; conclusions and implications of key findings; systematic review registration number. | 2-3                 |
| <b>INTRODUCTION</b>                |    |                                                                                                                                                                                                                                                                                                             |                     |
| Rationale                          | 3  | Describe the rationale for the review in the context of what is already known.                                                                                                                                                                                                                              | 4                   |
| Objectives                         | 4  | Provide an explicit statement of questions being addressed with reference to participants, interventions, comparisons, outcomes, and study design (PICOS).                                                                                                                                                  | 5                   |
| <b>METHODS</b>                     |    |                                                                                                                                                                                                                                                                                                             |                     |
| Protocol and registration          | 5  | Indicate if a review protocol exists, if and where it can be accessed (e.g., Web address), and, if available, provide registration information including registration number.                                                                                                                               | 5                   |
| Eligibility criteria               | 6  | Specify study characteristics (e.g., PICOS, length of follow-up) and report characteristics (e.g., years considered, language, publication status) used as criteria for eligibility, giving rationale.                                                                                                      | 6                   |
| Information sources                | 7  | Describe all information sources (e.g., databases with dates of coverage, contact with study authors to identify additional studies) in the search and date last searched.                                                                                                                                  | 5                   |
| Search                             | 8  | Present full electronic search strategy for at least one database, including any limits used, such that it could be repeated.                                                                                                                                                                               | 5-6 and supplements |
| Study selection                    | 9  | State the process for selecting studies (i.e., screening, eligibility, included in systematic review, and, if applicable, included in the meta-analysis).                                                                                                                                                   | 5-8                 |
| Data collection process            | 10 | Describe method of data extraction from reports (e.g., piloted forms, independently, in duplicate) and any processes for obtaining and confirming data from investigators.                                                                                                                                  | 6-7                 |
| Data items                         | 11 | List and define all variables for which data were sought (e.g., PICOS, funding sources) and any assumptions and simplifications made.                                                                                                                                                                       | 6-7                 |
| Risk of bias in individual studies | 12 | Describe methods used for assessing risk of bias of individual studies (including specification of whether this was done at the study or outcome level), and how this information is to be used in any data synthesis.                                                                                      | 8                   |
| Summary measures                   | 13 | State the principal summary measures (e.g., risk ratio, difference in means).                                                                                                                                                                                                                               | 7-8                 |
| Synthesis of results               | 14 | Describe the methods of handling data and combining results of studies, if done, including measures of consistency (e.g., I <sup>2</sup> ) for each meta-analysis.                                                                                                                                          | 7-8                 |



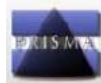

# PRISMA 2009 Checklist

Page 1 of 2

| Section/topic                 | #  | Checklist item                                                                                                                                                                                           | Reported on page # |
|-------------------------------|----|----------------------------------------------------------------------------------------------------------------------------------------------------------------------------------------------------------|--------------------|
| Risk of bias across studies   | 15 | Specify any assessment of risk of bias that may affect the cumulative evidence (e.g., publication bias, selective reporting within studies).                                                             | 8                  |
| Additional analyses           | 16 | Describe methods of additional analyses (e.g., sensitivity or subgroup analyses, meta-regression), if done, indicating which were pre-specified.                                                         | 8                  |
| <b>RESULTS</b>                |    |                                                                                                                                                                                                          |                    |
| Study selection               | 17 | Give numbers of studies screened, assessed for eligibility, and included in the review, with reasons for exclusions at each stage, ideally with a flow diagram.                                          | 8-9                |
| Study characteristics         | 18 | For each study, present characteristics for which data were extracted (e.g., study size, PICOS, follow-up period) and provide the citations.                                                             | 8-9                |
| Risk of bias within studies   | 19 | Present data on risk of bias of each study and, if available, any outcome level assessment (see item 12).                                                                                                | 11-12              |
| Results of individual studies | 20 | For all outcomes considered (benefits or harms), present, for each study: (a) simple summary data for each intervention group (b) effect estimates and confidence intervals, ideally with a forest plot. | 8-11               |
| Synthesis of results          | 21 | Present results of each meta-analysis done, including confidence intervals and measures of consistency.                                                                                                  | 8-11               |
| Risk of bias across studies   | 22 | Present results of any assessment of risk of bias across studies (see Item 15).                                                                                                                          | 11-12              |
| Additional analysis           | 23 | Give results of additional analyses, if done (e.g., sensitivity or subgroup analyses, meta-regression [see Item 16]).                                                                                    | 12                 |
| <b>DISCUSSION</b>             |    |                                                                                                                                                                                                          |                    |
| Summary of evidence           | 24 | Summarize the main findings including the strength of evidence for each main outcome; consider their relevance to key groups (e.g., healthcare providers, users, and policy makers).                     | 12-13              |
| Limitations                   | 25 | Discuss limitations at study and outcome level (e.g., risk of bias), and at review-level (e.g., incomplete retrieval of identified research, reporting bias).                                            | 15-16              |
| Conclusions                   | 26 | Provide a general interpretation of the results in the context of other evidence, and implications for future research.                                                                                  | 16                 |
| <b>FUNDING</b>                |    |                                                                                                                                                                                                          |                    |
| Funding                       | 27 | Describe sources of funding for the systematic review and other support (e.g., supply of data); role of funders for the systematic review.                                                               | 17                 |

From: Moher D, Liberati A, Tetzlaff J, Altman DG, The PRISMA Group (2009). Preferred Reporting Items for Systematic Reviews and Meta-Analyses: The PRISMA Statement. PLoS Med 6(7): e1000097. doi:10.1371/journal.pmed1000097

For more information, visit: [www.prisma-statement.org](http://www.prisma-statement.org).

Page 2 of 2

For peer review only - <http://bmjopen.bmj.com/site/about/guidelines.xhtml>

# BMJ Open

## Association of the neutrophil to lymphocyte ratio and clinical outcomes in lung cancer patients receiving immunotherapy: a meta-analysis

|                                 |                                                                                                                                                                                                                   |
|---------------------------------|-------------------------------------------------------------------------------------------------------------------------------------------------------------------------------------------------------------------|
| Journal:                        | <i>BMJ Open</i>                                                                                                                                                                                                   |
| Manuscript ID                   | bmjopen-2019-035031.R2                                                                                                                                                                                            |
| Article Type:                   | Original research                                                                                                                                                                                                 |
| Date Submitted by the Author:   | 14-Apr-2020                                                                                                                                                                                                       |
| Complete List of Authors:       | Jin, Jing; Sichuan University West China Hospital<br>Yang, Lan; Sichuan University West China Hospital<br>Liu, Dan; Sichuan University West China Hospital<br>Li, Weimin; Sichuan University West China Hospital, |
| <b>Primary Subject Heading</b>: | Oncology                                                                                                                                                                                                          |
| Secondary Subject Heading:      | Respiratory medicine                                                                                                                                                                                              |
| Keywords:                       | Immunology < BASIC SCIENCES, Epidemiology < ONCOLOGY, Respiratory tract tumours < ONCOLOGY                                                                                                                        |
|                                 |                                                                                                                                                                                                                   |

SCHOLARONE™  
Manuscripts



I, the Submitting Author has the right to grant and does grant on behalf of all authors of the Work (as defined in the below author licence), an exclusive licence and/or a non-exclusive licence for contributions from authors who are: i) UK Crown employees; ii) where BMJ has agreed a CC-BY licence shall apply, and/or iii) in accordance with the terms applicable for US Federal Government officers or employees acting as part of their official duties; on a worldwide, perpetual, irrevocable, royalty-free basis to BMJ Publishing Group Ltd ("BMJ") its licensees and where the relevant Journal is co-owned by BMJ to the co-owners of the Journal, to publish the Work in this journal and any other BMJ products and to exploit all rights, as set out in our [licence](#).

The Submitting Author accepts and understands that any supply made under these terms is made by BMJ to the Submitting Author unless you are acting as an employee on behalf of your employer or a postgraduate student of an affiliated institution which is paying any applicable article publishing charge ("APC") for Open Access articles. Where the Submitting Author wishes to make the Work available on an Open Access basis (and intends to pay the relevant APC), the terms of reuse of such Open Access shall be governed by a Creative Commons licence – details of these licences and which [Creative Commons](#) licence will apply to this Work are set out in our licence referred to above.

Other than as permitted in any relevant BMJ Author's Self Archiving Policies, I confirm this Work has not been accepted for publication elsewhere, is not being considered for publication elsewhere and does not duplicate material already published. I confirm all authors consent to publication of this Work and authorise the granting of this licence.

1  
2  
3  
4 1 **Association of the neutrophil to lymphocyte ratio and clinical**  
5  
6 2 **outcomes in lung cancer patients receiving immunotherapy: a**  
7  
8  
9 3 **meta-analysis**  
10  
11  
12 4

13  
14 5 **Jing Jin<sup>1</sup>, Lan Yang<sup>1</sup>, Dan Liu<sup>1</sup>, Wei-Min Li<sup>1\*</sup>**

15  
16  
17 6 1. Department of Pulmonary & Critical Care, West China Hospital, Sichuan  
18  
19 7 University, Chengdu 610041, China.

20  
21  
22 8 **Running title:** Neutrophil to lymphocyte ratio and lung cancer

23  
24  
25 9 **Address correspondence to:** Dr. Wei-Min Li, Department of Pulmonary & Critical  
26  
27 10 Care, West China Hospital, Sichuan University, Chengdu 610041, China. Tel: +86 (028)  
28  
29 11 85423998; E-mail: [weimin003@yahoo.com](mailto:weimin003@yahoo.com)

30  
31  
32 12 **Article summary**

33  
34  
35 13 **Strengths and limitations of this study**

36  
37  
38 14 **1. Verification of the prognostic value of the NLR in a large number of lung**  
39  
40 15 **cancer patients who received immunotherapy**

41  
42  
43 16 **2. Different clinical characteristics could affect the prognostic value of the NLR**

44  
45  
46 17 **3. High heterogeneity was present in this analysis**  
47  
48  
49 18

1  
2  
3  
4 **Abstract:**

5  
6 **Objectives:** To explore the relationship between the pretreatment or posttreatment  
7  
8  
9  
10  
11  
12  
13  
14  
15  
16  
17  
18  
19  
20  
21  
22  
23  
24  
25  
26  
27  
28  
29  
30  
31  
32  
33  
34  
35  
36  
37  
38  
39  
40  
41  
42  
43  
44  
45  
46  
47  
48  
49  
50  
51  
52  
53  
54  
55  
56  
57  
58  
59  
60  
neutrophil to lymphocyte ratio (NLR) and overall survival (OS)/ progression-free  
survival (PFS) in lung cancer patients receiving immunotherapy.

**Design:** We searched several databases to collect relevant studies conducted until July  
2019. We carefully reviewed the full text of the included publications and combined  
the hazard ratios (HRs) and 95% confidence intervals (CIs) to assess the association  
between the NLR and survival time in lung cancer patients receiving immunotherapy.

**Data Sources:** PubMed, the Cochrane Library, Embase and Web of Science

**Eligibility Criteria:** Studies reporting the prognostic value of the NLR in lung cancer  
patients receiving immunotherapy were enrolled.

**Data extraction and synthesis:** Basic information on the articles and patients (NLR  
cutoff value, NLR at baseline, and HRs with 95% CIs for OS and PFS) was extracted  
by two authors independently. The pooled HRs of OS and PFS were synthesized  
using the random effects or fixed effects model.

**Results:** Twenty-three studies with 2068 patients were enrolled. Among all patients,  
1305 (64.0%) were males, and 643 (31.4%) were diagnosed with squamous cell  
carcinoma. In a pooled analysis of OS and PFS from all studies, an elevated NLR

1 predicted poor OS (HR=1.62; 95% CI: 1.41-1.87; P< 0.001) and PFS (HR=1.47; 95%  
2 CI: 1.25-1.72; P< 0.0001). Subgroup analyses stratified showed that the posttreatment  
3 NLR was not significantly related to OS and that patients in Asia had significantly  
4 higher HRs than those in Europe and America. Furthermore, the proportion of  
5 squamous cell carcinoma and baseline NLR could affect the prognostic value of the  
6 NLR.

7 **Conclusions:** Our study found that an elevated NLR was associated with poor OS and  
8 PFS in lung cancer patients receiving immunotherapy and that several clinical factors  
9 might have an impact on the predictive value of the NLR in the survival of lung  
10 cancer patients.

11  
12 **Keywords:** NLR; systemic inflammation; prognostic markers; lung cancer

## 1 **Introduction:**

2 Lung cancer is the most prevalent cancer and life-threatening malignancy  
3 worldwide.(1) The pathogenesis of lung cancer is complicated, and the primary  
4 treatments for lung cancer patients are surgery and chemotherapy. Unfortunately,  
5 most patients with lung cancer are diagnosed at advanced stages, and the benefits  
6 achieved from chemotherapy in advanced lung cancer patients are relatively small.  
7 Recently, many studies have revealed that tumor cells can evade the antitumor  
8 responses of T cells by controlling the combined responses of programmed cell death  
9 protein 1 (PD-1) and programmed cell death ligand-1 (PD-L1).(2) Nivolumab,  
10 pembrolizumab, atezolizumab, durvalumab, ipilimumab and tremelimumab have  
11 successfully changed clinical experiences in lung cancer treatment.(3) Tumor  
12 mutational burden,(4) neoantigens(5) and classical monocytes in the peripheral  
13 blood(6) and PD-L1 expression on tumor cells in particular, (7) are effective  
14 predictive biomarkers for immune checkpoint therapy in lung cancer. Systemic  
15 inflammation in cancer patients is believed to influence the growth and migration of  
16 tumors via certain inflammatory factors.(8) An elevated level of systemic  
17 inflammation, including Glasgow prognostic score (GPS), neutrophil to lymphocyte  
18 ratio (NLR), platelet to lymphocyte ratio (PLR), and C-reactive protein to albumin

1 ratio (CAR), have been indicated to be associated with poor survival in patients with  
2 solid tumors.(9-11) However, data on the prognostic value of the pretreatment NLR in  
3 lung cancer patients receiving immunotherapy remain scarce and inconsistent.  
4 Therefore, we reviewed available publications and conducted a meta-analysis to  
5 explore the prognostic value of the pretreatment NLR for overall survival (OS) and  
6 progression-free survival (PFS) in clinical trials on lung cancer patients receiving  
7 immunotherapy.

## 8 **Materials and Methods**

### 9 **Patient and Public Involvement: No patient was involved**

#### 10 **Search strategy**

11 The PRISMA guidelines for a systematic review and meta-analysis were strictly  
12 followed in this article (registration number PROSPERO: CRD42018104856). An  
13 online search was conducted to identify relevant publications in the PubMed,  
14 Cochrane Library, Web of Science and Embase databases. The following words were  
15 used to search for studies on the associations between the pretreatment NLR and  
16 survival time in patients with lung cancer published before July 2019: “pulmonary  
17 neoplasms”, “neutrophil lymphocyte ratio”, “immunotherapy”, “programmed death  
18 receptor-1”, and “immune checkpoint inhibitor”. A full electronic search strategy is



1 provided in the supplementary information (Supplementary Table 1). Additional  
2 studies were selected for a full-text review were selected by exploring the references  
3 cited in the selected articles and relevant reviews. The articles were limited to the  
4 English language, but there were no restrictions on the minimum number of patients.  
5 Two authors (J Jin and L Yang) independently reviewed the titles and abstracts of the  
6 retrieved articles to select the potentially relevant articles for a careful assessment.

### 7 **Eligibility criteria**

8 The inclusion criteria were as follows: 1) retrospective or prospective studies  
9 published before July 2019; 2) all patients enrolled in the studies were diagnosed with  
10 lung cancer by biopsy and received immunotherapy; 3) the value of the NLR was  
11 calculated based on the level of neutrophils and lymphocytes; and 4) HRs and 95%  
12 CIs were provided and data necessary to calculate them were reported.

13 The exclusion criteria were as follows: 1) review, meeting abstract, letter, or full text  
14 unavailable in English; 2) nonhuman studies; and 3) research that did not provide the  
15 value of the NLR.

### 16 **Data extraction**

17 From each study, the name of the study, first author, year of publication, study design,  
18 number of patients, sex distribution, age, median follow-up time, histology, NLR

1 cutoff value, NLR at baseline, line of therapy, drugs and HRs with 95% CIs for OS  
2 and PFS were extracted by two authors (D Liu and L Yang). If univariate and  
3 multivariate analysis results were simultaneously reported, only the multivariate  
4 analysis results were extracted. Any disagreements between the authors were resolved  
5 by a discussion and consensus. The most recent study was chosen when duplicate  
6 studies occurred.

### 7 **Quality assessment**

8 The primary studies were assessed by the Newcastle-Ottawa quality assessment Scale  
9 (NOS). The quality assessment was conducted by two independent researchers (J Jin  
10 and D Liu). The studies in which the mark was between 6 and 9 points were regarded  
11 as high-quality studies.

12 ([http://www.ohri.ca/programs/clinical\\_epidemiology/oxford.asp](http://www.ohri.ca/programs/clinical_epidemiology/oxford.asp))

### 13 **Statistical analysis**

14 The primary endpoints were the OS and PFS of lung cancer patients receiving  
15 immunotherapy. PFS was defined as the time from the initial date of immunotherapy  
16 to the date of progression or death. OS was calculated from the date of inclusion to  
17 the time of death from any cause. HRs with 95% CIs were directly obtained from the  
18 articles or estimated from the Kaplan-Meier curves according to the methods reported

1  
2  
3  
4 1 by Tierney et al.(12) We calculated the pooled HRs of OS and PFS using random  
5  
6 2 effects or fixed effects model. We performed the Q-test to assess between-study  
7  
8  
9 3 heterogeneity and calculated the  $I^2$  statistic, which expresses the percentage of the  
10  
11 4 total observed variability due to study heterogeneity. The heterogeneity between  
12  
13  
14 5 studies was considered small if the  $I^2$  statistic was less than 50% and the P value for  
15  
16  
17 6 the Q-test was less than 0.05. We performed a subgroup analysis to detect the source  
18  
19  
20 7 of heterogeneity. In addition, we considered only subgroups that included more than  
21  
22  
23 8 two studies. Publication bias was assessed by Egger's and Begg's test, and  
24  
25 9 significant publication bias was defined as a  $P < 0.10$ .(13) The trim and fill method was  
26  
27  
28 10 applied when significant publication bias was found to confirm the pooled results.  
29  
30  
31 11 Sensitivity analyses were carried out by excluding each study individually from the  
32  
33 12 meta-analysis.(14) All statistical analyses were performed with R (Version: 3.5.2).

## 34 35 13 **Result**

### 36 37 38 14 **The characteristics of the included studies**

39  
40 15 A total of 1102 studies were retrieved in this meta-analysis, and 279 studies were  
41  
42  
43 16 selected for full-text review. In total, 23 studies with 2068 patients fulfilled the  
44  
45  
46 17 inclusion and exclusion criteria, with publication dates ranging from 2017 to  
47  
48  
49 18 2018.(15-37) The flow diagram of this study is shown in Figure 1. The sample size  
50  
51  
52  
53  
54  
55  
56  
57  
58  
59  
60

1 was between 19 and 201. Of these studies, 9 were conducted in Europe, (16, 17, 21,  
2 24, 27, 30, 35, 36) 5 were conducted in America, (22, 28, 31, 33, 37) and the  
3 remaining studies were conducted in Asia. Among all patients included, 1305 (64.0%)  
4 were males, and 643 (31.4%) were diagnosed with squamous cell carcinoma. Twenty  
5 studies explored the association between the NLR and OS; fifteen studies investigated  
6 the relationship between the NLR and PFS. Additionally, 7 of 23 studies provided  
7 data on the posttreatment NLR. (21, 23, 25, 28, 29, 32, 33) If the study provided data  
8 about posttreatment NLR and OS, we treated it as an independent study in the  
9 subsequent analysis. Six trials performed first-line therapy, (16, 19, 25, 28, 31, 36)  
10 and the other trails performed second or additional-lines of therapy. Most patients  
11 received nivolumab, a PD-1 inhibitor, as immunotherapy. The cutoff value of the  
12 NLR was not the same in all studies; a value of 5 was used frequently, and the median  
13 cutoff value for all enrolled publications was also 5. The NOS scores of the enrolled  
14 studies ranged from 6-9. Detailed information on these studies is presented in Table 1.

#### 15 **Relationship between the NLR and OS in lung cancer patients receiving** 16 **immunotherapy**

17 Twenty studies on a total of 1629 patients treated with immunotherapy provided the  
18 NLR value or data that could be used to calculate the NLR and OS. Five of these

1 studies provided data on the posttreatment NLR and OS. Data from a total of 23  
2 studies were used to combine HRs and 95% CIs. In the pooled analysis of the NLR  
3 and OS, we found that a higher NLR was associated with poorer OS, with high  
4 heterogeneity (HR=1.62; 95% CI: 1.41-1.87; P< 0.001) ( $I^2=81.7\%$ , P< 0.001) (Figure  
5 2). To detect the source of heterogeneity, we conducted a subgroup analysis on certain  
6 clinical factors that may influence the final results, such as study design, the time at  
7 which the NLR was determined, ethnicity, sex ratio, the proportion of patients with  
8 squamous cell carcinoma (SCC%), the NLR at baseline, the treatment line, the  
9 median follow-up time, sample size and the drug given for immunotherapy (Figure 3).  
10 Interestingly, the association between the pretreatment NLR and OS showed a similar  
11 trend to the pooled result (HR=1.87; 95% CI: 1.46-2.39; P < 0.001). However, the  
12 posttreatment NLR was not significantly related to the OS in lung cancer patients  
13 (HR=1.80; 95% CI: 0.81-4.00; P= 0.111). However, these results were still highly  
14 heterogeneous (pretreatment:  $I^2=79.80\%$ , P< 0.001; posttreatment:  $I^2=83.5\%$ , P<  
15 0.001). Furthermore, the NLR was significantly unrelated to the OS in studies in  
16 which the proportion of patients with squamous cell carcinoma or whose baseline  
17 NLR exceeded the cutoff value was greater than 50% (Figure 3). The subgroup  
18 analysis stratified by ethnicity found that patients in Asia had significantly higher HR

1 (HR=2.76; 95% CI: 1.88- 4.06) and less heterogeneity ( $I^2=45.7\%$ ,  $P=0.091$ ) than  
2 those in Europe and America ( $P_{\text{interaction}}=0.030$ ) (Figure 3).

### 3 **Relationship between the NLR and PFS in lung cancer patients receiving** 4 **immunotherapy**

5 Data on the NLR and PFS of 1612 patients treated with immunotherapy in 20 studies  
6 were extracted to obtain the pooled HR and 95% CI. Four of these studies provided  
7 the posttreatment NLR and its relationship with PFS. The random effects model  
8 revealed a significant association between an elevated NLR and PFS in lung cancer  
9 patients receiving immunotherapy (HR=1.47; 95% CI: 1.25-1.72;  $P<0.001$ ) with high  
10 heterogeneity ( $I^2=72.5\%$ ,  $P<0.001$ ) (Figure 4). To detect the potential source of  
11 heterogeneity in studies reporting PFS data, a subgroup analysis stratified by the  
12 factors that affect the NLR was performed as previously described (Figure 5). Similar  
13 to the relationship between the NLR and OS, the NLR was significantly unrelated to  
14 the PFS in studies in which the proportion of patients with squamous cell carcinoma  
15 was greater than 50% ( $P_{\text{interaction}}=0.005$ ). However, the pooled results for subgroups  
16 based on other factors were not markedly changed with a low level of heterogeneity.

### 17 **Sensitivity analysis and Publication bias**

18 We found high heterogeneity among studies in which the relationship between the

1 pretreatment NLR, OS and PFS was analyzed. Therefore, we performed a sensitivity  
2 analysis on all enrolled studies. The effect of each study set on the combined HRs was  
3 evaluated by excluding each study individually from the meta-analysis. The results of  
4 the sensitivity analysis showed that the pooled HRs for OS and PFS were robust in  
5 our meta-analysis (Figure 6A and 6B). We also conducted a subgroup analysis  
6 stratified by various factors to detect the source of heterogeneity. Begg's test  
7 presented no evidence of obvious publication bias in studies reporting the association  
8 between the NLR and OS ( $P=0.673$ ) or in those reporting the association between the  
9 NLR and PFS ( $P=0.074$ ), but Egger's test showed significant publication bias in  
10 which both were reported ( $P<0.001$  for both). Therefore, we performed a trim and fill  
11 analysis on studies reporting the relationship between the NLR and OS/PFS.  
12 However, the result was unchanged after eliminating the influence of publication bias  
13 (OS: HR=1.40; 95% CI:1.22-1.60;  $P<0.001$ , PFS: HR=1.33; 95% CI:1.14-1.56;  $P<$   
14  $0.001$ , Supplementary Figure 1).

#### 15 **Discussion:**

16 The results of our meta-analysis revealed the prognostic effect of both the  
17 pretreatment and posttreatment NLR on OS and PFS in lung cancer patients receiving  
18 immunotherapy. Twenty-three studies showed that an increased NLR was

1 significantly associated with poor OS and PFS. Interestingly, the posttreatment NLR  
2 was not significantly associated with OS, and patients in Asia had significantly higher  
3 HRs than those in Europe and America.

4 The immune checkpoint is a kind of mechanism that plays a protective role in the  
5 human immune system and acts as a brake to prevent inflammatory damage caused by  
6 the excessive activation of T cells.(38) Human anti-PD-1 IgG4 mAb is now widely  
7 used and shows higher efficacy than standard therapies in lung cancer therapies. (39)  
8 Despite a wide consensus on testing tumor tissues for PD-L1 expression, the human  
9 anti-PD-1 IgG4 mAb is limited by its “unperfected dichotomy” across studies and  
10 molecules; patients with low levels of PD-L1 expression have response rates of up to  
11 17%, and roughly half of patients are “not-responders” despite having high tumor  
12 levels of PD-L1. Several factors could affect the response and survival of patients  
13 receiving immunotherapy.(39) In addition to tumor mutation loads and the expression  
14 of tumor antigens, the status of systemic inflammation also plays an important role in  
15 lung cancer patients receiving immunotherapy. Tumor-associated cytokines and the  
16 relevant signaling pathways could be reflected by the level of systemic inflammation,  
17 which has been proven to be associated with poor survival in patients with solid  
18 tumors.(8) Biomarkers such as NLR, PLR, GPS and modified GPS(mGPS) have been



1 used as prognostic factors in lung cancer.(9-11) In addition, the role of systemic  
2 inflammation in patients receiving immunotherapy is particularly important for their  
3 survival. Several studies have explored the effect of the pretreatment NLR on lung  
4 cancer patients receiving immunotherapy.(31, 40-45) There are also two meta-  
5 analyses concerning the pretreatment NLR and survival in patients with advanced  
6 cancer. (46) (47) In summary, the NLR is a reliable prognostic factor for patients with  
7 various cancer types.

8 Sacdalan D. B reported that a high NLR resulted in poor PFS in patients with several  
9 kinds of cancers, such as melanoma, non-small-cell lung cancer (NSCLC) and  
10 genitourinary cancer,(46) which was consistent with our results. However, only three  
11 publications on lung cancer were enrolled in the previous meta-analysis, and a  
12 nonsignificant association was discovered between the pretreatment NLR and OS was  
13 discovered. In addition, two of the three studies included in the meta-analysis  
14 previously mentioned only provided only abstracts, and we could not obtain more  
15 details about those cohorts or study designs. Another meta-analysis conducted by Jiang  
16 T also revealed a trend similar to ours, but the results of the subgroup analysis showed  
17 that posttreatment NLR was significantly associated with poor OS and PFS, which is  
18 inconsistent with our result. Different with the study mentioned before, we enrolled

1 more research articles and performed subgroup analyses stratified by additional clinical  
2 factors. Furthermore, our results showed that the ethnicity, the NLR at baseline and the  
3 proportion of patients with squamous cell carcinoma may affect the prognostic value of  
4 the NLR. However, due to the high heterogeneity, the results must be interpreted with  
5 caution. We also found that patients in Asia had a significant higher HR than those in  
6 Europe and America in the subgroup analysis of the relationship between the NLR and  
7 OS. Some studies showed that neutrophils were the most abundant immune cell type  
8 identified in NSCLC patients and accounted for nearly 20% of all CD45+ cells in  
9 patients from America.(48) However, this result was not found in patients from Asia or  
10 Europe. The systemic inflammatory response in different ethnicities might differ.  
11 Furthermore, we collected baseline patient information, including the proportion of  
12 patients with squamous cell carcinoma, from all studies, and our results showed that  
13 the histology of lung cancer might have an impact on the prognostic value of the NLR.  
14 Many factors including tumor mutation load and the expression of tumor antigens,  
15 affect patient response and survival. (39) Patients with lung adenocarcinoma have a  
16 high EGFR mutation rate and some studies revealed that patients with targetable  
17 oncogenes were associated with a poor response to immunotherapy. (49) This may  
18 account for the results of our article.

1  
2  
3  
4 1 The current study had several limitations. First, high heterogeneity was present in this  
5  
6 2 analysis although we conducted sensitivity analyses on all studies. The results were  
7  
8  
9 3 robust after eliminating each study from the analysis. In addition, we performed  
10  
11 4 subgroup analyses on certain possible impact factors to detect the source of  
12  
13  
14 5 heterogeneity. Second, Egger's test showed that obvious publication bias in the  
15  
16  
17 6 current study. The pooled results should be treated with caution, although trim and fill  
18  
19  
20 7 analysis testing indicated credibility for this study. Additionally, considering the high  
21  
22 8 heterogeneity after subgroup analysis, other factors might be responsible for the high  
23  
24  
25 9 heterogeneity in this meta-analysis.

26  
27 **Conclusion:**  
28

29  
30 11 Generally, our meta-analysis focused on the clinical prognostic agreement of the NLR  
31  
32 12 and OS and PFS in lung cancer patients. Importantly, given the limitations mentioned  
33  
34  
35 13 above, these findings should be treated with caution in clinical practice. More  
36  
37  
38 14 prospective cohort studies are needed to confirm our results.

39  
40 **Contributorship statement:**  
41

42  
43 16 (I) Conception and design: W Li, J Jin and Lan Y; (II) Administrative support: J Jin, W  
44  
45 17 Li; (III) Provision of study materials or patients: D Liu; (IV) Collection and assembly  
46  
47  
48 18 of data: J Jin, D Liu; (V) Data analysis and interpretation: D Liu, Lan Y; (VI)  
49  
50  
51  
52  
53  
54  
55  
56  
57  
58  
59  
60

1 Manuscript writing: All authors; (VII) Final approval of manuscript: All authors.

2 **Competing interests**

3 The authors have no conflicts of interest to declare

4 **Funding**

5 None

6 **Data sharing statement:**

7 All data in the current study are available in the published articles

8 **Acknowledgments:**

9 This work was supported by the Transformation Projects of Sci-Tech Achievements  
10 of Sichuan Province (2016CZYD0001), the Sci-Tech Support Program of Science and  
11 Technology Department of Sichuan Province (2016SZ0073), the National Major Sci-  
12 Tech Project (2017ZX10103004-012) and the National Key Development Plan for  
13 Precision Medicine Research (2017YFC0910004).

14 **Compliance with Ethical Standards**

15 **Ethical approval:** All procedures performed in the studies involving human  
16 participants were in accordance with the ethical standards of the institutional and/or  
17 national research committee and with the 1964 Helsinki Declaration and its later  
18 amendment.

**Reference:**

1. Siegel RL, Miller KD, Jemal A. Cancer statistics, 2015. *CA Cancer J Clin.* 2015;65(1):5-29.
2. Callahan MK, Postow MA, Wolchok JD. Targeting T Cell Co-receptors for Cancer Therapy. *Immunity.* 2016;44(5):1069-78.
3. Chen YM. Immune checkpoint inhibitors for nonsmall cell lung cancer treatment. *Journal of the Chinese Medical Association Jcma.* 2016;80(1):7.
4. Yarchoan M, Hopkins A, Jaffee EM. Tumor Mutational Burden and Response Rate to PD-1 Inhibition. *The New England journal of medicine.* 2017;377(25):2500-1.
5. Anagnostou V, Smith KN, Forde PM, Niknafs N, Bhattacharya R, White J, et al. Evolution of Neoantigen Landscape during Immune Checkpoint Blockade in Non-Small Cell Lung Cancer. *Cancer discovery.* 2017;7(3):264-76.
6. Goswami S, Basu S, Sharma P. A potential biomarker for anti-PD-1 immunotherapy. *Nature medicine.* 2018;24(2):123-4.
7. Marchetti A, Barberis M, Franco R, De Luca G, Pace MV, Staibano S, et al. Multicenter Comparison of 22C3 PharmDx (Agilent) and SP263 (Ventana) Assays to Test PD-L1 Expression for NSCLC Patients to Be Treated with Immune Checkpoint Inhibitors. *Journal of thoracic oncology : official publication of the International Association for the Study of Lung Cancer.* 2017;12(11):1654-63.
8. Hooper CE, Lyburn ID, Searle J, Darby M, Hall T, Hall D, et al. The South West Area Mesothelioma and Pemetrexed trial: a multicentre prospective observational study evaluating novel markers of chemotherapy response and prognostication. *British journal of cancer.* 2015;112(7):1175-82.
9. Wang X, Teng F, Kong L, Yu J. Pretreatment neutrophil-to-lymphocyte ratio as a survival predictor for small-cell lung cancer. *OncoTargets and therapy.* 2016;9:5761-70.
10. Sanchez-Salcedo P, de-Torres JP, Martinez-Urbistondo D, Gonzalez-Gutierrez J, Berto J, Campo A, et al. The neutrophil to lymphocyte and platelet to lymphocyte ratios as biomarkers for lung cancer development. *Lung cancer (Amsterdam, Netherlands).* 2016;97:28-34.
11. Kos M, Hoczade C, Kos FT, Uncu D, Karakas E, Dogan M, et al. Prognostic role of pretreatment platelet/lymphocyte ratio in patients with non-small cell lung cancer. *Wien Klin Wochenschr.* 2016;128(17-18):635-40.
12. Tierney JF, Stewart LA, Ghersi D, Burdett S, Sydes MR. Practical methods for incorporating summary time-to-event data into meta-analysis. *Trials.* 2007;8(1):16.
13. Begg CB, Mazumdar M. Operating characteristics of a rank correlation test for publication bias. *Biometrics.* 1994;50(4):1088.
14. O'Rourke K, Shea B, Wells GA. *Meta-Analysis of Clinical Trials: Springer New York; 2001.* 397-424 p.
15. Ren F, Zhao T, Liu B, Pan L. Neutrophil-lymphocyte ratio (NLR) predicted prognosis for advanced

- 1 non-small-cell lung cancer (NSCLC) patients who received immune checkpoint blockade (ICB).  
2 OncoTargets and therapy. 2019;12:4235-44.
- 3 16. Pavan A, Calvetti L, Dal Maso A, Attili I, Del Bianco P, Pasello G, et al. Peripheral Blood Markers  
4 Identify Risk of Immune-Related Toxicity in Advanced Non-Small Cell Lung Cancer Treated with  
5 Immune-Checkpoint Inhibitors. *The oncologist*. 2019.
- 6 17. Passiglia F, Galvano A, Castiglia M, Incorvaia L, Calo V, Listi A, et al. Monitoring blood biomarkers  
7 to predict nivolumab effectiveness in NSCLC patients. *Therapeutic advances in medical oncology*.  
8 2019;11:1758835919839928.
- 9 18. Minami S, Ihara S, Ikuta S, Komuta K. Gustave Roussy Immune Score and Royal Marsden Hospital  
10 Prognostic Score Are Biomarkers of Immune-Checkpoint Inhibitor for Non-Small Cell Lung Cancer.  
11 *World journal of oncology*. 2019;10(2):90-100.
- 12 19. Ichiki Y, Taira A, Chikaishi Y, Matsumiya H, Mori M, Kanayama M, et al. Prognostic factors of  
13 advanced or postoperative recurrent non-small cell lung cancer targeted with immune check point  
14 inhibitors. *Journal of thoracic disease*. 2019;11(4):1117-23.
- 15 20. Fukui T, Okuma Y, Nakahara Y, Otani S, Igawa S, Katagiri M, et al. Activity of Nivolumab and Utility  
16 of Neutrophil-to-Lymphocyte Ratio as a Predictive Biomarker for Advanced Non-Small-Cell Lung Cancer:  
17 A Prospective Observational Study. *Clinical lung cancer*. 2019;20(3):208-14.e2.
- 18 21. Dusselier M, Deluche E, Delacourt N, Ballouhey J, Egenod T, Melloni B, et al. Neutrophil-to-  
19 lymphocyte ratio evolution is an independent predictor of early progression of second-line nivolumab-  
20 treated patients with advanced non-small-cell lung cancers. *PloS one*. 2019;14(7):e0219060.
- 21 22. Zer A, Sung MR, Walia P, Khoja L, Maganti M, Labbe C, et al. Correlation of Neutrophil to  
22 Lymphocyte Ratio and Absolute Neutrophil Count With Outcomes With PD-1 Axis Inhibitors in Patients  
23 With Advanced Non-Small-Cell Lung Cancer. *Clinical lung cancer*. 2018;19(5):426-+.
- 24 23. Takeda T, Takeuchi M, Saitoh M, Takeda S. Neutrophil-to-lymphocyte ratio after four weeks of  
25 nivolumab administration as a predictive marker in patients with pretreated non-small-cell lung cancer.  
26 *Thoracic cancer*. 2018;9(10):1291-9.
- 27 24. Svaton M, Zemanova M, Skrickova J, Jakubikova L, Kolek V, Kultan J, et al. Chronic Inflammation  
28 as a Potential Predictive Factor of Nivolumab Therapy in Non-small Cell Lung Cancer. *Anticancer  
29 research*. 2018;38(12):6771-82.
- 30 25. Suh KJ, Kim SH, Kim YJ, Kim M, Keam B, Kim TM, et al. Post-treatment neutrophil-to-lymphocyte  
31 ratio at week 6 is prognostic in patients with advanced non-small cell lung cancers treated with anti-  
32 PD-1 antibody. *Cancer Immunology Immunotherapy*. 2018;67(3):459-70.
- 33 26. Shiroyama T, Suzuki H, Tamiya M, Tamiya A, Tanaka A, Okamoto N, et al. Pretreatment advanced  
34 lung cancer inflammation index (ALI) for predicting early progression in nivolumab-treated patients  
35 with advanced non-small cell lung cancer. *Cancer medicine*. 2018;7(1):13-20.
- 36 27. Russo A, Franchina T, Ricciardi GRR, Battaglia A, Scimone A, Berenato R, et al. Baseline neutrophilia,

- 1  
2  
3  
4  
5  
6  
7  
8  
9  
10  
11  
12  
13  
14  
15  
16  
17  
18  
19  
20  
21  
22  
23  
24  
25  
26  
27  
28  
29  
30  
31  
32  
33  
34  
35  
36  
37  
38  
39  
40  
41  
42  
43  
44  
45  
46  
47  
48  
49  
50  
51  
52  
53  
54  
55  
56  
57  
58  
59  
60
- 1 derived neutrophil-to-lymphocyte ratio (dNLR), platelet-to-lymphocyte ratio (PLR), and outcome in non  
2 small cell lung cancer (NSCLC) treated with Nivolumab or Docetaxel. *Journal of cellular physiology*.  
3 2018;233(10):6337-43.
- 4 28. Park W, Kwon D, Saravia D, Desai A, Vargas F, El Dinali M, et al. Developing a Predictive Model for  
5 Clinical Outcomes of Advanced Non-Small Cell Lung Cancer Patients Treated With Nivolumab. *Clinical*  
6 *lung cancer*. 2018;19(3):280-8.e4.
- 7 29. Nakaya A, Kurata T, Yoshioka H, Takeyasu Y, Niki M, Kibata K, et al. Neutrophil-to-lymphocyte ratio  
8 as an early marker of outcomes in patients with advanced non-small-cell lung cancer treated with  
9 nivolumab. *International journal of clinical oncology*. 2018;23(4):634-40.
- 10 30. Mezquita L, Auclin E, Ferrara R, Charrier M, Remon J, Planchard D, et al. Association of the Lung  
11 Immune Prognostic Index With Immune Checkpoint Inhibitor Outcomes in Patients With Advanced  
12 Non-Small Cell Lung Cancer. *JAMA oncology*. 2018;4(3):351-7.
- 13 31. Maymani H, Hess K, Groisberg R, Hong DS, Naing A, Piha-Paul S, et al. Predicting outcomes in  
14 patients with advanced non-small cell lung cancer enrolled in early phase immunotherapy trials. *Lung*  
15 *cancer (Amsterdam, Netherlands)*. 2018;120:137-41.
- 16 32. Kiri T, Yamamoto M, Nagano T, Hazama D, Sekiya R, Katsurada M, et al. The time-series behavior  
17 of neutrophil-to-lymphocyte ratio is useful as a predictive marker in non-small cell lung cancer. *PLoS*  
18 *one*. 2018;13(2):e0193018.
- 19 33. Khunger M, Patil PD, Khunger A, Li M, Hu B, Rakshit S, et al. Post-treatment changes in  
20 hematological parameters predict response to nivolumab monotherapy in non-small cell lung cancer  
21 patients. *PLoS one*. 2018;13(10):e0197743.
- 22 34. Inomata M, Hirai T, Seto Z, Tokui K, Taka C, Okazawa S, et al. Clinical Parameters for Predicting the  
23 Survival in Patients with Squamous and Non-squamous-cell NSCLC Receiving PD-1 Inhibitor Therapy.  
24 *Pathology oncology research : POR*. 2018.
- 25 35. Facchinetti F, Veneziani M, Buti S, Gelsomino F, Squadrilli A, Bordi P, et al. Clinical and hematologic  
26 parameters address the outcomes of non-small-cell lung cancer patients treated with nivolumab.  
27 *Immunotherapy*. 2018;10(8):681-94.
- 28 36. Diem S, Schmid S, Krapf M, Flatz L, Born D, Jochum W, et al. Neutrophil-to-Lymphocyte ratio (NLR)  
29 and Platelet-to-Lymphocyte ratio (PLR) as prognostic markers in patients with non-small cell lung cancer  
30 (NSCLC) treated with nivolumab. *Lung cancer (Amsterdam, Netherlands)*. 2017;111:176-81.
- 31 37. Bagley SJ, Kothari S, Aggarwal C, Bauml JM, Alley EW, Evans TL, et al. Pretreatment neutrophil-to-  
32 lymphocyte ratio as a marker of outcomes in nivolumab-treated patients with advanced non-small-cell  
33 lung cancer. *Lung cancer (Amsterdam, Netherlands)*. 2017;106:1-7.
- 34 38. Ito A, Kondo S, Tada K, Kitano S. Clinical Development of Immune Checkpoint Inhibitors. *Biomed*  
35 *Res Int*. 2015;2015:605478.
- 36 39. Carbone DP, Reck M, Paz-Ares L, Creelan B, Horn L, Steins M, et al. First-Line Nivolumab in Stage

- 1  
2  
3 1 IV or Recurrent Non-Small-Cell Lung Cancer. *The New England journal of medicine*. 2017;376(25):2415-  
4 2 26.  
5 3  
6 40. Mezquita L, Auclin E, Ferrara R, Charrier M, Remon J, Planchard D, et al. Association of the Lung  
7 4 Immune Prognostic Index With Immune Checkpoint Inhibitor Outcomes in Patients With Advanced  
8 5 Non-Small Cell Lung Cancer. *JAMA Oncol*. 2018;4(3):351-7.  
9 6  
10 41. Nakaya A, Kurata T, Yoshioka H, Takeyasu Y, Niki M, Kibata K, et al. Neutrophil-to-lymphocyte ratio  
11 7 as an early marker of outcomes in patients with advanced non-small-cell lung cancer treated with  
12 8 nivolumab. *Int J Clin Oncol*. 2018.  
13 9  
14 42. Zer A, Sung MR, Walia P, Khoja L, Maganti M, Labbe C, et al. Correlation of Neutrophil to  
15 10 Lymphocyte Ratio and Absolute Neutrophil Count With Outcomes With PD-1 Axis Inhibitors in Patients  
16 11 With Advanced Non-Small-Cell Lung Cancer. *Clin Lung Cancer*. 2018.  
17 12  
18 43. Park W, Kwon D, Saravia D, Desai A, Vargas F, El Dinali M, et al. Developing a Predictive Model for  
19 13 Clinical Outcomes of Advanced Non-Small Cell Lung Cancer Patients Treated With Nivolumab. *Clinical  
20 14 Lung Cancer*. 2018;19(3):280-8.e4.  
21 15  
22 44. Fukui T, Okuma Y, Nakahara Y, Otani S, Igawa S, Katagiri M, et al. Activity of Nivolumab and Utility  
23 16 of Neutrophil-to-Lymphocyte Ratio as a Predictive Biomarker for Advanced Non-Small-Cell Lung Cancer:  
24 17 A Prospective Observational Study. *Clinical Lung Cancer*. 2018.  
25 18  
26 45. Russo A, Franchina T, Ricciardi GRR, Battaglia A, Scimone A, Berenato R, et al. Baseline neutrophilia,  
27 19 derived neutrophil-to-lymphocyte ratio (dNLR), platelet-to-lymphocyte ratio (PLR), and outcome in non  
28 20 small cell lung cancer (NSCLC) treated with Nivolumab or Docetaxel. *J Cell Physiol*. 2018.  
29 21  
30 46. Sacdalan DB, Lucero JA, Sacdalan DL. Prognostic utility of baseline neutrophil-to-lymphocyte ratio  
31 22 in patients receiving immune checkpoint inhibitors: a review and meta-analysis. *OncoTargets and  
32 23 therapy*. 2018;11:955-65.  
33 24  
34 47. Jiang T, Bai Y, Zhou F, Li W, Gao G, Su C, et al. Clinical value of neutrophil-to-lymphocyte ratio in  
35 25 patients with non-small-cell lung cancer treated with PD-1/PD-L1 inhibitors. *Lung cancer (Amsterdam,  
36 26 Netherlands)*. 2019;130:76-83.  
37 27  
38 48. Kargl J, Busch SE, Yang GH, Kim KH, Hanke ML, Metz HE, et al. Neutrophils dominate the immune  
39 28 cell composition in non-small cell lung cancer. *Nature communications*. 2017;8:14381.  
40 29  
41 49. Mazieres J, Drilon A, Lusque A, Mhanna L, Cortot AB, Mezquita L, et al. Immune checkpoint  
42 30 inhibitors for patients with advanced lung cancer and oncogenic driver alterations: results from the  
43 31 IMMUNOTARGET registry. *Ann Oncol*. 2019;30(8):1321-8.

44 32

### 47 33 **Figure Legends**

49 34 Figure 1 Flow chart of study selection

51

52

53

54

55

56

57

58

59

60



1  
2  
3  
4 1 Figure 2 Forest plot of the association between the NLR and OS in patients with lung  
5  
6 2 cancer receiving immunotherapy  
7

8  
9 3 Figure 3 Subgroup analysis of the relationship between the NLR and OS in patients  
10  
11 4 with lung cancer receiving immunotherapy  
12

13  
14 5 Abbreviations: ICI: immune checkpoint inhibitor; M/F: male/female; SCC%:  
15  
16 6 proportion of patients with squamous cell carcinoma; ※: the data here show the  
17  
18 7 proportion of patients whose baseline NLR exceeded the cutoff value; N: nivolumab;  
19  
20 8 P: pembrolizumab; D: durvalumab; E: embrolizumab; A: atezolizumab  
21  
22  
23

24  
25 9 Figure 4 Forest plot of the association between the NLR and PFS in patients with lung  
26  
27 10 cancer receiving immunotherapy  
28

29  
30 11 Figure 5 Subgroup analysis of the relationship between the NLR and PFS in patients  
31  
32 12 with lung cancer receiving immunotherapy  
33

34  
35 13 Abbreviations: ICI: immune checkpoint inhibitor; M/F: male/female; SCC%:  
36  
37 14 proportion of patients with squamous cell carcinoma; ※: 20 studies provided the data  
38  
39 15 on the pretreatment NLR and PFS, and 5 of them also provided the posttreatment  
40  
41 16 NLR and PFS; N: nivolumab; P: pembrolizumab; D: durvalumab; E: embrolizumab;  
42  
43 17 A: atezolizumab  
44  
45  
46

47  
48 18 Figure 6 Sensitivity analysis of OS (A) and PFS (B)  
49  
50  
51  
52  
53  
54  
55  
56  
57  
58  
59  
60

1  
2  
3  
4 **1 Table**5  
6 **2 Table 1 The basic characteristics of the enrolled studies**

| 7 Study                | 8 Year    | 9 Country                        | 10 Ethnicity     | 11 Sample size   | 12 MFP   | 13 M/F     | 14 NLR at baseline     |
|------------------------|-----------|----------------------------------|------------------|------------------|----------|------------|------------------------|
| 15 Diem S              | 16 2017   | 17 Europe                        | 18 European      | 19 52            | 20 NM    | 21 29/23   | 22 5.0(2.7-8.3) *      |
| 23 Bagley SJ           | 24 2017   | 25 America                       | 26 American      | 27 175           | 28 NM    | 29 80/95   | 30 NLR $\geq$ 5:58.0%  |
| 31 Russo A             | 32 2018   | 33 Italy                         | 34 European      | 35 28            | 36 17    | 37 25/3    | 38 NM                  |
| 39 Zer A               | 40 2018   | 41 America                       | 42 American      | 43 88            | 44 5.3   | 45 43/45   | 46 NLR $>$ 4:56.8%     |
| 47 Nakaya A            | 48 2018   | 49 Japan                         | 50 Asian         | 51 101           | 52 8.9   | 53 77/24   | 54 NLR $\geq$ 3:46.5%  |
| 55 Maymani H           | 56 2018   | 57 America                       | 58 American      | 59 74            | 60 12.3  | 61 36/38   | 62 NLR $>$ 6:20.3%     |
| 63 Mezquita L          | 64 2018   | 65 Europe                        | 66 European      | 67 161           | 68 12    | 69 100/61  | 70 NLR $>$ 3:39.0%     |
| 71 Fukui T             | 72 2018   | 73 Japan                         | 74 Asian         | 75 52            | 76 10.9  | 77 37/15   | 78 NLR $\geq$ 5:34.6%  |
| 79 Park W              | 80 2018   | 81 America                       | 82 American      | 83 159           | 84 11.5  | 85 82/77   | 86 4.3(0.5-24.1) *     |
| 87 Takeda T            | 88 2018   | 89 Japan                         | 90 Asian         | 91 30            | 92 NM    | 93 19/11   | 94 NLR $>$ 5:30.0%     |
| 95 Svaton M            | 96 2018   | 97 Czech Republic                | 98 European      | 99 120           | 100 NM   | 101 71/49  | 102 NLR $>$ 3.8:50.0%  |
| 103 Suh Koung Jin      | 104 2018  | 105 Korea                        | 106 Asian        | 107 54           | 108 26.2 | 109 42/12  | 110 NLR $>$ 5:14.8%    |
| 111 Shiroyama Takayuki | 112 2018  | 113 Japan                        | 114 Asian        | 115 201          | 116 12.4 | 117 135/66 | 118 NLR $>$ 4:39.3%    |
| 119 Kiri T             | 120 2018  | 121 Japan                        | 122 Asian        | 123 19.00        | 124 NM   | 125 19     | 126 NLR $>$ 5:31.6%    |
| 127 Khunger M          | 128 2018  | 129 America                      | 130 American     | 131 109          | 132 30   | 133 56/53  | 134 NLR $\geq$ 5:50.5% |
| 135 Inomata M          | 136 2018  | 137 Japan                        | 138 Asian        | 139 36           | 140 NM   | 141 27/9   | 142 NLR $\geq$ 5:44.4% |
| 143 Facchinetti F      | 144 2018  | 145 Italy                        | 146 European     | 147 54           | 148 12.6 | 149 45/9   | 150 NM                 |
| 151 Ren F              | 152 2019  | 153 China                        | 154 Asian        | 155 147          | 156 2.6  | 157 94/53  | 158 NLR $>$ 2.5:59.9%  |
| 159 Pavan A            | 160 2019  | 161 Italy                        | 162 European     | 163 184          | 164 56.3 | 165 125/59 | 166 NLR $\geq$ 3:57.5% |
| 167 Passiglia F        | 168 2019  | 169 Italy                        | 170 European     | 171 45           | 172 9.1  | 173 32/13  | 174 NLR $>$ 3.3:51.1%  |
| 175 Minami S           | 176 2019  | 177 Japan                        | 178 Asian        | 179 76           | 180 NM   | 181 49/27  | 182 NLR $\geq$ 6:14.5% |
| 183 Ichiki Y           | 184 2019  | 185 Japan                        | 186 Asian        | 187 44           | 188 4.83 | 189 38/6   | 190 NM                 |
| 191 Dusselier M        | 192 2019  | 193 France                       | 194 European     | 195 59           | 196 NM   | 197 44/15  | 198 NLR $>$ 5:62.7%    |
| 199 Study              | 200 SCC%  | 201 Treatment lines              | 202 Outcome      | 203 Study design | 204 NOS  | 205 Cutoff | 206 IO                 |
| 207 Diem S             | 208 34.6% | 209 including first line therapy | 210 OS/PFS       | 211 RO           | 212 6    | 213 5      | 214 N                  |
| 215 Bagley SJ          | 216 24.0% | 217 at least second-line therapy | 218 OS/PFS       | 219 RO           | 220 6    | 221 5      | 222 N                  |
| 223 Russo A            | 224 60.7% | 225 at least second-line therapy | 226 OS/PFS       | 227 RO           | 228 7    | 229 3      | 230 N                  |
| 231 Zer A              | 232 17.1% | 233 at least second-line therapy | 234 OS/PFS/DCR   | 235 RO           | 236 7    | 237 4      | 238 NM                 |
| 239 Nakaya A           | 240 36.6% | 241 at least second-line therapy | 242 PFS/irAEs    | 243 RO           | 244 6    | 245 3      | 246 N                  |
| 247 Maymani H          | 248 16.2% | 249 including first line therapy | 250 OS/PFS       | 251 RO           | 252 7    | 253 6      | 254 N/P/D              |
| 255 Mezquita L         | 256 28.6% | 257 at least second line therapy | 258 OS/PFS       | 259 RO           | 260 9    | 261 3      | 262 N/E/A/D            |
| 263 Fukui T            | 264 30.8% | 265 at least second-line therapy | 266 OS/PFS/irAEs | 267 PO           | 268 7    | 269 5      | 270 N                  |

1

2

|    |                           |       |                              |               |    |   |     |       |
|----|---------------------------|-------|------------------------------|---------------|----|---|-----|-------|
| 3  | <b>Park W</b>             | 24.5% | including first line therapy | OS/PFS        | RO | 7 | 5   | N     |
| 4  | <b>Takeda T</b>           | 30.0% | at least second-line therapy | PFS           | RO | 6 | 5   | N     |
| 5  | <b>Svaton M</b>           | 33.3% | at least second-line therapy | OS/PFS        | RO | 7 | 3.8 | N     |
| 6  | <b>Suh Koung Jin</b>      | 31.5% | including first line therapy | OS/PFS/irAEs  | RO | 8 | 5   | N/P   |
| 7  | <b>Shiroyama Takayuki</b> | 30.4% | at least second-line therapy | PFS/RR        | RO | 7 | 4   | N     |
| 8  | <b>Kiri T</b>             | 31.5% | at least second-line therapy | OS/PFS/TTF    | RO | 7 | 5   | N     |
| 9  | <b>Khunger M</b>          | 23.9% | at least second-line therapy | OS            | RO | 6 | 5   | N     |
| 10 | <b>Inomata M</b>          | 44.4% | at least second-line therapy | PFS           | RO | 6 | 5   | N/P   |
| 11 | <b>Facchinetti F</b>      | 48.2% | at least second-line therapy | OS/PFS/TTF/DP | PO | 8 | 4   | N     |
| 12 | <b>Ren F</b>              | 42.2% | at least second-line therapy | OS/PFS        | RO | 6 | 2.5 | N/P   |
| 13 | <b>Pavan A</b>            | 32.1% | including first line therapy | OS/PFS/irAEs  | RO | 8 | 3   | N/P/A |
| 14 | <b>Passiglia F</b>        | 44.4% | at least second-line therapy | OS/TTP        | RO | 8 | 3.3 | N     |
| 15 | <b>Minami S</b>           | 23.7% | at least second-line therapy | OS/PFS        | RO | 9 | 6   | N/P/A |
| 16 | <b>Ichiki Y</b>           | 65.9% | including first line therapy | OS/PFS/irAEs  | RO | 7 | NM  | N/P   |
| 17 | <b>Dusselier M</b>        | 20.3% | at least second-line therapy | OS            | RO | 8 | 5   | N     |

23

24

25

26

27

28

29

30

31

32

33

34

35

36

37

38

39

40

41

42

43

44

45

46

47

48

49

50

51

52

53

54

55

56

57

58

59

60

1

2 Abbreviations: NLR: neutrophil to lymphocyte ratio; NM: not mentioned; M/F:

3 male/female; MFP: median follow-up (months); SCC%: proportion of patients with

4 squamous cell carcinoma; IO: immunotherapy; N: nivolumab; P: pembrolizumab; D:

5 durvalumab; E: embrolizumab; A: atezolizumab; OS: overall survival; PFS:

6 progression-free survival; DCR: disease control rate; irAEs: immune-related adverse

7 events; RR: response rate; TTF: time to treatment failure; RO: retrospective study;

8 PO: prospective study; NOS: Newcastle-Ottawa quality assessment Scale; \*: the study

9 provided only the median NLR and range at baseline.

10 **Supplementary information**

11 S1: Search strategy. This file provides the full electronic search strategy for PubMed

1  
2  
3  
4  
5  
6  
7  
8  
9  
10  
11  
12  
13  
14  
15  
16  
17  
18  
19  
20  
21  
22  
23  
24  
25  
26  
27  
28  
29  
30  
31  
32  
33  
34  
35  
36  
37  
38  
39  
40  
41  
42  
43  
44  
45  
46  
47  
48  
49  
50  
51  
52  
53  
54  
55  
56  
57  
58  
59  
60

1 S2: Figure 1. Trim and fill analysis of OS and PFS

2

For peer review only

1  
2  
3  
4  
5  
6  
7  
8  
9  
10  
11  
12  
13  
14  
15  
16  
17  
18  
19  
20  
21  
22  
23  
24  
25  
26  
27  
28  
29  
30  
31  
32  
33  
34  
35  
36  
37  
38  
39  
40  
41  
42  
43  
44  
45  
46  
47  
48  
49  
50  
51  
52  
53  
54  
55  
56  
57  
58  
59  
60

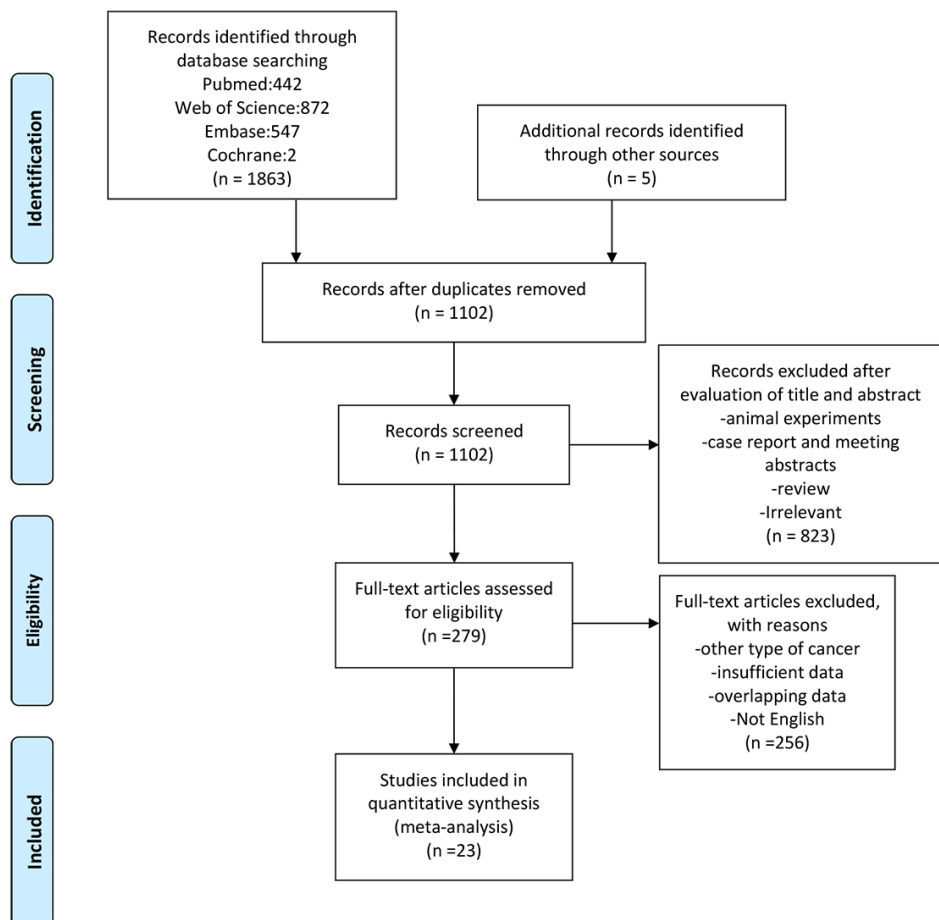

Figure 1 Flow chart of study selection

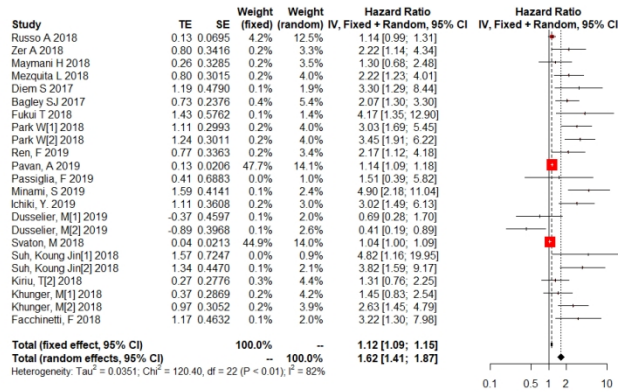

Figure 2 Forest plot of the association between NLR and OS in patients with lung cancer receiving immunotherapy

396x246mm (96 x 96 DPI)



Figure 3 Subgroup analysis of the relationship between the NLR and OS in patients with lung cancer receiving immunotherapy



Figure 4 Forest plot of the association between NLR and PFS in patients with lung cancer receiving immunotherapy

396x246mm (96 x 96 DPI)



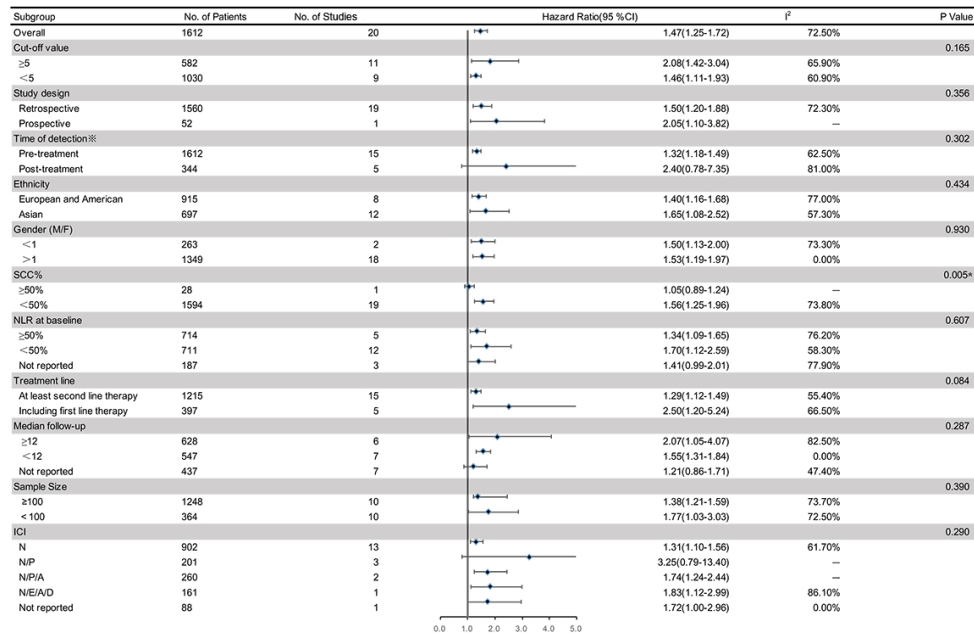

Figure 5 Subgroup analysis of the relationship between the NLR and PFS in patients with lung cancer receiving immunotherapy



Figure 6 Sensitivity analysis on OS (A) and PFS (B)

143x74mm (300 x 300 DPI)

**Supplement Table1 Search strategy for meta-analysis of Correlation of the neutrophil to lymphocyte ratio and clinical outcomes in lung cancer patients receiving immunotherapy: a meta-analysis (PubMed via NLM)**

|   |                                                                                                                                                                                                                                                                                                                                                                                                                                                 |
|---|-------------------------------------------------------------------------------------------------------------------------------------------------------------------------------------------------------------------------------------------------------------------------------------------------------------------------------------------------------------------------------------------------------------------------------------------------|
|   | <b>Search terms: <i>neutrophil to lymphocyte ratio and lung cancer patients with immunotherapy</i></b>                                                                                                                                                                                                                                                                                                                                          |
|   | <b><i>Population: persons with lung cancer receiving immunotherapy</i></b>                                                                                                                                                                                                                                                                                                                                                                      |
| 1 | (((((Cancer of Lung) OR Pulmonary Neoplasms) OR Neoplasms, Lung) OR Lung Neoplasm) OR Neoplasm, Lung) OR Neoplasms, Pulmonary) OR Neoplasm, Pulmonary) OR Pulmonary Neoplasm) OR Lung Cancer) OR Cancer, Lung) OR Cancers, Lung) OR Lung Cancers) OR Pulmonary Cancer) OR Cancer, Pulmonary) OR Cancers, Pulmonary) OR Pulmonary Cancers) OR Cancer of the Lung) OR "Lung Neoplasms"[Mesh]))) AND (("Immunotherapy"[Mesh]) AND Immunotherapies) |
|   | <b><i>Intervention (Expose): neutrophil to lymphocyte ratio</i></b>                                                                                                                                                                                                                                                                                                                                                                             |
| 2 | ((NLR) OR (neutrophil to lymphocyte ratio) OR neutrophil lymphocyte ratio))                                                                                                                                                                                                                                                                                                                                                                     |
|   | <b><i>Combined sets</i></b>                                                                                                                                                                                                                                                                                                                                                                                                                     |
| 3 | 1 and 2                                                                                                                                                                                                                                                                                                                                                                                                                                         |
|   | <b><i>Limits</i></b>                                                                                                                                                                                                                                                                                                                                                                                                                            |
| 4 | 3 AND English [Language]                                                                                                                                                                                                                                                                                                                                                                                                                        |

[Mesh] = Term from the Medline controlled vocabulary, including terms found below this term in the Mesh hierarchy

1  
2  
3  
4  
5  
6  
7  
8  
9  
10  
11  
12  
13  
14  
15  
16  
17  
18  
19  
20  
21  
22  
23  
24  
25  
26  
27  
28  
29  
30  
31  
32  
33  
34  
35  
36  
37  
38  
39  
40  
41  
42  
43  
44  
45  
46  
47  
48  
49  
50  
51  
52  
53  
54  
55  
56  
57  
58  
59  
60

A



B



150x60mm (300 x 300 DPI)



# PRISMA 2009 Checklist

| Section/topic                      | #  | Checklist item                                                                                                                                                                                                                                                                                              | Reported on page #  |
|------------------------------------|----|-------------------------------------------------------------------------------------------------------------------------------------------------------------------------------------------------------------------------------------------------------------------------------------------------------------|---------------------|
| <b>TITLE</b>                       |    |                                                                                                                                                                                                                                                                                                             |                     |
| Title                              | 1  | Identify the report as a systematic review, meta-analysis, or both.                                                                                                                                                                                                                                         | 1                   |
| <b>ABSTRACT</b>                    |    |                                                                                                                                                                                                                                                                                                             |                     |
| Structured summary                 | 2  | Provide a structured summary including, as applicable: background; objectives; data sources; study eligibility criteria, participants, and interventions; study appraisal and synthesis methods; results; limitations; conclusions and implications of key findings; systematic review registration number. | 2-3                 |
| <b>INTRODUCTION</b>                |    |                                                                                                                                                                                                                                                                                                             |                     |
| Rationale                          | 3  | Describe the rationale for the review in the context of what is already known.                                                                                                                                                                                                                              | 4                   |
| Objectives                         | 4  | Provide an explicit statement of questions being addressed with reference to participants, interventions, comparisons, outcomes, and study design (PICOS).                                                                                                                                                  | 5                   |
| <b>METHODS</b>                     |    |                                                                                                                                                                                                                                                                                                             |                     |
| Protocol and registration          | 5  | Indicate if a review protocol exists, if and where it can be accessed (e.g., Web address), and, if available, provide registration information including registration number.                                                                                                                               | 5                   |
| Eligibility criteria               | 6  | Specify study characteristics (e.g., PICOS, length of follow-up) and report characteristics (e.g., years considered, language, publication status) used as criteria for eligibility, giving rationale.                                                                                                      | 6                   |
| Information sources                | 7  | Describe all information sources (e.g., databases with dates of coverage, contact with study authors to identify additional studies) in the search and date last searched.                                                                                                                                  | 5                   |
| Search                             | 8  | Present full electronic search strategy for at least one database, including any limits used, such that it could be repeated.                                                                                                                                                                               | 5-6 and supplements |
| Study selection                    | 9  | State the process for selecting studies (i.e., screening, eligibility, included in systematic review, and, if applicable, included in the meta-analysis).                                                                                                                                                   | 5-8                 |
| Data collection process            | 10 | Describe method of data extraction from reports (e.g., piloted forms, independently, in duplicate) and any processes for obtaining and confirming data from investigators.                                                                                                                                  | 6-7                 |
| Data items                         | 11 | List and define all variables for which data were sought (e.g., PICOS, funding sources) and any assumptions and simplifications made.                                                                                                                                                                       | 6-7                 |
| Risk of bias in individual studies | 12 | Describe methods used for assessing risk of bias of individual studies (including specification of whether this was done at the study or outcome level), and how this information is to be used in any data synthesis.                                                                                      | 8                   |
| Summary measures                   | 13 | State the principal summary measures (e.g., risk ratio, difference in means).                                                                                                                                                                                                                               | 7-8                 |
| Synthesis of results               | 14 | Describe the methods of handling data and combining results of studies, if done, including measures of consistency (e.g., $I^2$ ) for each meta-analysis.                                                                                                                                                   | 7-8                 |

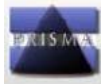

# PRISMA 2009 Checklist

Page 1 of 2

| Section/topic                 | #  | Checklist item                                                                                                                                                                                           | Reported on page # |
|-------------------------------|----|----------------------------------------------------------------------------------------------------------------------------------------------------------------------------------------------------------|--------------------|
| Risk of bias across studies   | 15 | Specify any assessment of risk of bias that may affect the cumulative evidence (e.g., publication bias, selective reporting within studies).                                                             | 8                  |
| Additional analyses           | 16 | Describe methods of additional analyses (e.g., sensitivity or subgroup analyses, meta-regression), if done, indicating which were pre-specified.                                                         | 8                  |
| <b>RESULTS</b>                |    |                                                                                                                                                                                                          |                    |
| Study selection               | 17 | Give numbers of studies screened, assessed for eligibility, and included in the review, with reasons for exclusions at each stage, ideally with a flow diagram.                                          | 8-9                |
| Study characteristics         | 18 | For each study, present characteristics for which data were extracted (e.g., study size, PICOS, follow-up period) and provide the citations.                                                             | 8-9                |
| Risk of bias within studies   | 19 | Present data on risk of bias of each study and, if available, any outcome level assessment (see item 12).                                                                                                | 11-12              |
| Results of individual studies | 20 | For all outcomes considered (benefits or harms), present, for each study: (a) simple summary data for each intervention group (b) effect estimates and confidence intervals, ideally with a forest plot. | 8-11               |
| Synthesis of results          | 21 | Present results of each meta-analysis done, including confidence intervals and measures of consistency.                                                                                                  | 8-11               |
| Risk of bias across studies   | 22 | Present results of any assessment of risk of bias across studies (see Item 15).                                                                                                                          | 11-12              |
| Additional analysis           | 23 | Give results of additional analyses, if done (e.g., sensitivity or subgroup analyses, meta-regression [see Item 16]).                                                                                    | 12                 |
| <b>DISCUSSION</b>             |    |                                                                                                                                                                                                          |                    |
| Summary of evidence           | 24 | Summarize the main findings including the strength of evidence for each main outcome; consider their relevance to key groups (e.g., healthcare providers, users, and policy makers).                     | 12-13              |
| Limitations                   | 25 | Discuss limitations at study and outcome level (e.g., risk of bias), and at review-level (e.g., incomplete retrieval of identified research, reporting bias).                                            | 15-16              |
| Conclusions                   | 26 | Provide a general interpretation of the results in the context of other evidence, and implications for future research.                                                                                  | 16                 |
| <b>FUNDING</b>                |    |                                                                                                                                                                                                          |                    |
| Funding                       | 27 | Describe sources of funding for the systematic review and other support (e.g., supply of data); role of funders for the systematic review.                                                               | 17                 |

From: Moher D, Liberati A, Tetzlaff J, Altman DG, The PRISMA Group (2009). Preferred Reporting Items for Systematic Reviews and Meta-Analyses: The PRISMA Statement. PLoS Med 6(7): e1000097. doi:10.1371/journal.pmed1000097

For more information, visit: [www.prisma-statement.org](http://www.prisma-statement.org).

Page 2 of 2

For peer review only - <http://bmjopen.bmj.com/site/about/guidelines.xhtml>
