# Supplementary material for: Association of the neutrophil to lymphocyte ratio and clinical outcomes in patients with lung cancer receiving immunotherapy: a meta-analysis
Source: PubMed Central journal article supplement — BMJ Open. 2020 Jun 3;10(6):e035031. doi: 10.1136/bmjopen-2019-035031 (PMC7282333; doi:10.1136/bmjopen-2019-035031), 2020-06-03
Supplement: bmjopen-2019-035031supp002.pdf [file bmjopen-2019-035031supp002.pdf]

**Supplement Table1 Search strategy for meta-analysis of Correlation of the neutrophil to lymphocyte ratio and clinical outcomes in lung cancer patients receiving immunotherapy: a meta-analysis (PubMed via NLM)**

|   |                                                                                                                                                                                                                                                                                                                                                                                                                                                 |
|---|-------------------------------------------------------------------------------------------------------------------------------------------------------------------------------------------------------------------------------------------------------------------------------------------------------------------------------------------------------------------------------------------------------------------------------------------------|
|   | <b>Search terms: <i>neutrophil to lymphocyte ratio and lung cancer patients with immunotherapy</i></b>                                                                                                                                                                                                                                                                                                                                          |
|   | <b><i>Population: persons with lung cancer receiving immunotherapy</i></b>                                                                                                                                                                                                                                                                                                                                                                      |
| 1 | (((((Cancer of Lung) OR Pulmonary Neoplasms) OR Neoplasms, Lung) OR Lung Neoplasm) OR Neoplasm, Lung) OR Neoplasms, Pulmonary) OR Neoplasm, Pulmonary) OR Pulmonary Neoplasm) OR Lung Cancer) OR Cancer, Lung) OR Cancers, Lung) OR Lung Cancers) OR Pulmonary Cancer) OR Cancer, Pulmonary) OR Cancers, Pulmonary) OR Pulmonary Cancers) OR Cancer of the Lung) OR "Lung Neoplasms"[Mesh]))) AND (("Immunotherapy"[Mesh]) AND Immunotherapies) |
|   | <b><i>Intervention (Expose): neutrophil to lymphocyte ratio</i></b>                                                                                                                                                                                                                                                                                                                                                                             |
| 2 | ((NLR) OR (neutrophil to lymphocyte ratio) OR neutrophil lymphocyte ratio))                                                                                                                                                                                                                                                                                                                                                                     |
|   | <b><i>Combined sets</i></b>                                                                                                                                                                                                                                                                                                                                                                                                                     |
| 3 | 1 and 2                                                                                                                                                                                                                                                                                                                                                                                                                                         |
|   | <b><i>Limits</i></b>                                                                                                                                                                                                                                                                                                                                                                                                                            |
| 4 | 3 AND English [Language]                                                                                                                                                                                                                                                                                                                                                                                                                        |

[Mesh] = Term from the Medline controlled vocabulary, including terms found below this term in the Mesh hierarchy
