# Supplementary figures and images for: Association of the neutrophil to lymphocyte ratio and clinical outcomes in patients with lung cancer receiving immunotherapy: a meta-analysis
Source: PubMed Central journal article supplement — BMJ Open. 2020 Jun 3;10(6):e035031. doi: 10.1136/bmjopen-2019-035031 (PMC7282333; doi:10.1136/bmjopen-2019-035031), 2020-06-03

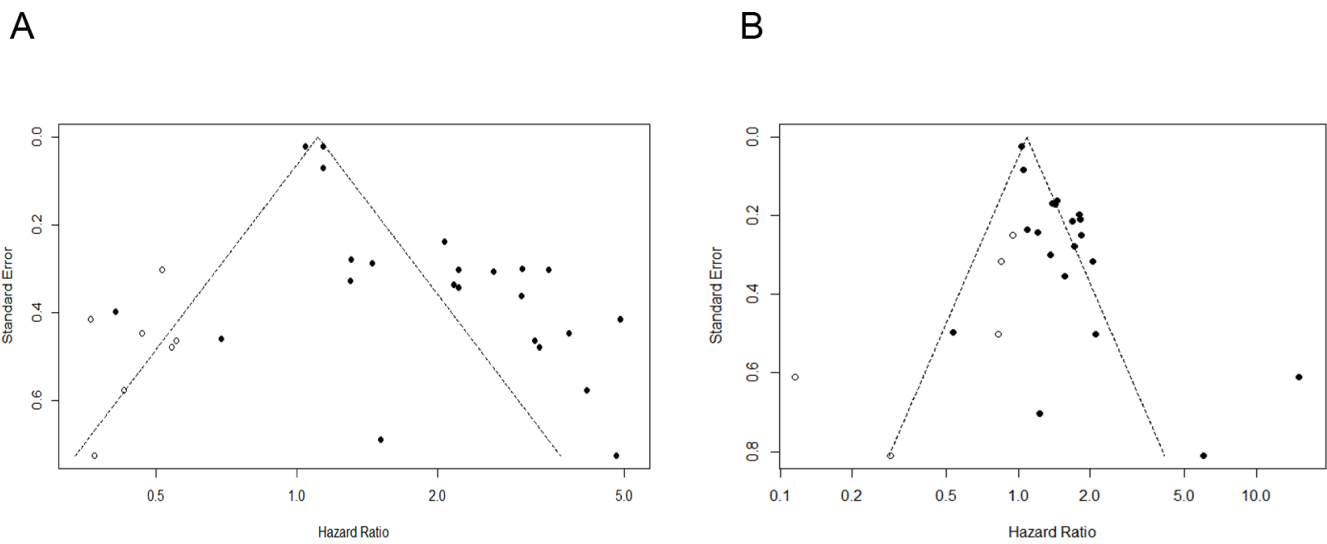

Supplement: bmjopen-2019-035031supp001.pdf [file bmjopen-2019-035031supp001.pdf]
